# Supplementary material for: Interleukin 12 Stimulates IFN-γ–Mediated Inhibition of Tumor-Induced Regulatory T-Cell Proliferation and Enhances Tumor Clearance
Source: Oxford University Press journal article supplement (doi:10.1158/0008-5472.can-09-1145), 2009-10-20
Supplement: 00085472can091145-sup-stable.xlsx [file 00085472can091145-sup-stable.xlsx]

## Sheet: Sheet2
Figure S5 Probeset ID	Gene Title	Gene Symbol	Ascites Average (linear)	Naive Average (linear)	Linear Fold Change (Ascites:Naive)	q-value	q LE 0.005, fold GT 2	q LT 0.005, fold LE 0.5	Gene Ontology Biological Process	Gene Ontology Cellular Component	Gene Ontology Molecular Function	Naïve Treg_biological_rep1 (log2)	Naïve Treg_biological_rep2 (log2)	Naïve Treg_biological_rep3 (log2)	Ascites Treg_biological_rep1 (log2)	Ascites Treg_biological_rep2 (log2)	Ascites Treg_biological_rep3 (log2)	Spleen-T Treg_biological_rep1 (log2)	Spleen-T Treg_biological_rep2 (log2)	Spleen-T Treg_biological_rep3 (log2)	ascites (Average) (log2)	naive (Average) (log2)	spleen (Average) (log2)
1436996_x_at	lysozyme 1	Lyz1	4913.83	26.4673	185.657	0.00320227	Yes	No	0008152 // metabolic process // inferred from electronic annotation /// 0016998 // cell wall catabolic process // inferred from electronic annotation /// 0019835 // cytolysis // inferred from electronic annotation /// 0042742 // defense response to bacterium // inferred from electronic annotation /// 0050829 // defense response to Gram-negative bacterium // inferred from direct assay /// 0050830 …	0005576 // extracellular region // inferred from electronic annotation	0003796 // lysozyme activity // inferred from electronic annotation /// 0003824 // catalytic activity // inferred from electronic annotation /// 0016787 // hydrolase activity // inferred from electronic annotation /// 0016798 // hydrolase activity, acting on glycosyl bonds // inferred from electronic annotation	4.97572	4.66373	4.53896	12.0113	12.7558	12.0208	11.9588	10.8514	11.4293	12.2626	4.72614	11.4132
1425923_at	v-myc myelocytomatosis viral related oncogene, neuroblastoma derived (avian)	Mycn	6107.22	89.4684	68.2612	0.00459075	Yes	No	0006355 // regulation of transcription, DNA-dependent // inferred from electronic annotation /// 0008284 // positive regulation of cell proliferation // inferred from mutant phenotype /// 0030324 // lung development // inferred from mutant phenotype /// 0045449 // regulation of transcription // inferred from electronic annotation /// 0048754 // branching morphogenesis of a tube // inferred from m…	0005634 // nucleus // inferred from direct assay /// 0005634 // nucleus // inferred from electronic annotation	0003677 // DNA binding // inferred from electronic annotation /// 0003700 // transcription factor activity // inferred from electronic annotation /// 0005515 // protein binding // inferred from physical interaction /// 0030528 // transcription regulator activity // inferred from electronic annotation	6.87053	6.65794	5.92145	13.0987	12.0013	12.6289	10.0633	7.43067	9.76492	12.5763	6.48331	9.0863
1419060_at	granzyme B	Gzmb	7644.47	194.859	39.2308	0.00459075	Yes	No	0006508 // proteolysis // inferred from electronic annotation /// 0006915 // apoptosis // inferred from electronic annotation /// 0008626 // induction of apoptosis by granzyme // inferred from direct assay /// 0019835 // cytolysis // inferred from electronic annotation	---	0003824 // catalytic activity // inferred from electronic annotation /// 0004252 // serine-type endopeptidase activity // inferred from electronic annotation /// 0005515 // protein binding // inferred from physical interaction /// 0008233 // peptidase activity // inferred from mutant phenotype /// 0008233 // peptidase activity // inferred from electronic annotation /// 0008236 // serine-type pept…	7.60088	7.40192	7.81605	13.1677	12.1817	13.3512	10.9929	10.0515	10.2093	12.9002	7.60628	10.4179
1448226_at	ribonucleotide reductase M2	Rrm2	1941.02	51.6778	37.56	0.00414948	Yes	No	0006260 // DNA replication // inferred from electronic annotation /// 0009186 // deoxyribonucleoside diphosphate metabolic process // inferred from electronic annotation /// 0009262 // deoxyribonucleotide metabolic process // inferred from direct assay /// 0009263 // deoxyribonucleotide biosynthetic process // inferred from direct assay /// 0009263 // deoxyribonucleotide biosynthetic process // i…	0005737 // cytoplasm // inferred from electronic annotation	0004748 // ribonucleoside-diphosphate reductase activity // inferred from direct assay /// 0004748 // ribonucleoside-diphosphate reductase activity // inferred from mutant phenotype /// 0004748 // ribonucleoside-diphosphate reductase activity // inferred from physical interaction /// 0004748 // ribonucleoside-diphosphate reductase activity // inferred from electronic annotation /// 0005506 // iro…	5.88039	5.75434	5.43969	10.9907	11.2601	10.517	10.2778	9.76178	9.4728	10.9226	5.69147	9.83746
1421811_at	similar to thrombospondin 1 /// thrombospondin 1	LOC640441 /// Thbs1	405.154	11.4072	35.5175	0.00467884	Yes	No	0006954 // inflammatory response // inferred from mutant phenotype /// 0007155 // cell adhesion // inferred from electronic annotation /// 0010759 // positive regulation of macrophage chemotaxis // inferred from mutant phenotype /// 0010811 // positive regulation of cell-substrate adhesion // inferred from direct assay /// 0016525 // negative regulation of angiogenesis // inferred from direct ass…	0005576 // extracellular region // inferred from electronic annotation /// 0005615 // extracellular space // inferred from direct assay	0005198 // structural molecule activity // inferred from electronic annotation /// 0005509 // calcium ion binding // inferred from electronic annotation /// 0005515 // protein binding // inferred from electronic annotation /// 0008201 // heparin binding // inferred from electronic annotation /// 0050840 // extracellular matrix binding // inferred from direct assay	3.13927	3.247	4.14933	8.69938	8.98254	8.30506	4.89742	3.09423	3.83385	8.66233	3.51187	3.94183
1426642_at	fibronectin 1	Fn1	1328.42	44.7807	29.6651	0.00397645	Yes	No	0006953 // acute-phase response // inferred from electronic annotation /// 0007044 // cell-substrate junction assembly // inferred from direct assay /// 0007155 // cell adhesion // inferred from direct assay /// 0007155 // cell adhesion // inferred from electronic annotation /// 0007160 // cell-matrix adhesion // inferred from direct assay /// 0007169 // transmembrane receptor protein tyrosine ki…	0005576 // extracellular region // inferred from electronic annotation /// 0005578 // proteinaceous extracellular matrix // inferred from direct assay /// 0005578 // proteinaceous extracellular matrix // traceable author statement /// 0005578 // proteinaceous extracellular matrix // inferred from electronic annotation /// 0005604 // basement membrane // inferred from direct assay /// 0016324 // a…	0005515 // protein binding // inferred from physical interaction /// 0005515 // protein binding // inferred from electronic annotation /// 0008201 // heparin binding // inferred from electronic annotation /// 0016491 // oxidoreductase activity // inferred from electronic annotation /// 0016504 // protease activator activity // inferred from direct assay	5.66446	5.10694	5.68302	10.2282	10.5439	10.3544	7.41868	5.93118	6.40582	10.3755	5.48481	6.58523
1424046_at	budding uninhibited by benzimidazoles 1 homolog (S. cerevisiae)	Bub1	419.805	14.7778	28.4078	0.00414948	Yes	No	0006468 // protein amino acid phosphorylation // inferred from electronic annotation /// 0007049 // cell cycle // inferred from electronic annotation /// 0007067 // mitosis // inferred from electronic annotation /// 0051301 // cell division // inferred from electronic annotation	0000775 // chromosome, centromeric region // inferred from direct assay /// 0000776 // kinetochore // inferred from direct assay /// 0000776 // kinetochore // not recorded /// 0000777 // condensed chromosome kinetochore // inferred from electronic annotation /// 0000780 // condensed nuclear chromosome, centromeric region // inferred from direct assay /// 0005634 // nucleus // inferred from electr…	0000166 // nucleotide binding // inferred from electronic annotation /// 0004672 // protein kinase activity // inferred from electronic annotation /// 0004674 // protein serine/threonine kinase activity // inferred from electronic annotation /// 0005524 // ATP binding // inferred from electronic annotation /// 0016301 // kinase activity // inferred from electronic annotation /// 0016740 // transf…	3.66042	4.20217	3.7935	8.9465	8.81756	8.37667	7.3081	6.69329	6.97967	8.71358	3.88536	6.99369
1429295_s_at	thyroid hormone receptor interactor 13	Trip13	1103.21	40.7777	27.0543	0.00445807	Yes	No	0000239 // pachytene // inferred from mutant phenotype /// 0001556 // oocyte maturation // inferred from mutant phenotype /// 0006302 // double-strand break repair // inferred from mutant phenotype /// 0007131 // reciprocal meiotic recombination // inferred from mutant phenotype /// 0007141 // male meiosis I // inferred from mutant phenotype /// 0007144 // female meiosis I // inferred from mutant…	0001673 // male germ cell nucleus // inferred from direct assay	0000166 // nucleotide binding // inferred from electronic annotation /// 0004872 // receptor activity // inferred from electronic annotation /// 0005515 // protein binding // inferred from physical interaction /// 0005524 // ATP binding // inferred from electronic annotation /// 0017111 // nucleoside-triphosphatase activity // inferred from electronic annotation /// 0042802 // identical protein b…	5.59147	4.91462	5.54304	10.3316	10.3528	9.63809	9.36857	9.02434	8.48933	10.1075	5.34971	8.96075
1417019_a_at	cell division cycle 6 homolog (S. cerevisiae)	Cdc6	763.967	29.0858	26.266	0.00248757	Yes	No	0006260 // DNA replication // inferred from electronic annotation /// 0007049 // cell cycle // inferred from electronic annotation /// 0007067 // mitosis // inferred from electronic annotation /// 0051301 // cell division // inferred from electronic annotation	0005634 // nucleus // inferred from electronic annotation /// 0005737 // cytoplasm // inferred from direct assay /// 0005737 // cytoplasm // inferred from electronic annotation /// 0005819 // spindle // inferred from direct assay	0000166 // nucleotide binding // inferred from electronic annotation /// 0003682 // chromatin binding // inferred from direct assay /// 0005515 // protein binding // inferred from electronic annotation /// 0005524 // ATP binding // inferred from electronic annotation /// 0017111 // nucleoside-triphosphatase activity // inferred from electronic annotation	4.7006	4.94929	4.93684	9.479	9.7078	9.5453	8.46414	7.61525	7.85276	9.57737	4.86224	7.97738
1415810_at	ubiquitin-like, containing PHD and RING finger domains, 1	Uhrf1	1810.95	69.4463	26.077	0.00320227	Yes	No	0006281 // DNA repair // inferred from electronic annotation /// 0006350 // transcription // inferred from electronic annotation /// 0006355 // regulation of transcription, DNA-dependent // inferred from electronic annotation /// 0006464 // protein modification process // inferred from electronic annotation /// 0006511 // ubiquitin-dependent protein catabolic process // inferred from electronic a…	0005634 // nucleus // traceable author statement /// 0005634 // nucleus // inferred from electronic annotation	0003677 // DNA binding // inferred from electronic annotation /// 0005515 // protein binding // inferred from electronic annotation /// 0008270 // zinc ion binding // inferred from electronic annotation /// 0016874 // ligase activity // inferred from electronic annotation /// 0046872 // metal ion binding // inferred from electronic annotation	5.86873	6.17618	6.30857	11.054	10.7027	10.7109	9.62088	8.96977	8.37023	10.8225	6.11783	8.98696
1428304_at	establishment of cohesion 1 homolog 2 (S. cerevisiae)	Esco2	206.59	8.0068	25.8019	0.00440516	Yes	No	0006281 // DNA repair // inferred from electronic annotation /// 0007049 // cell cycle // inferred from electronic annotation	0005634 // nucleus // inferred from electronic annotation	0003684 // damaged DNA binding // inferred from electronic annotation /// 0003887 // DNA-directed DNA polymerase activity // inferred from electronic annotation /// 0008270 // zinc ion binding // inferred from electronic annotation /// 0008415 // acyltransferase activity // inferred from electronic annotation /// 0016740 // transferase activity // inferred from electronic annotation /// 0046872 /…	3.03092	2.89152	3.08124	7.73958	8.19873	7.13358	5.66798	4.79422	4.55207	7.69063	3.00123	5.00476
1426774_at	poly (ADP-ribose) polymerase family, member 12	Parp12	1007.35	40.9984	24.5705	0.00470066	Yes	No	---	0005634 // nucleus // inferred from electronic annotation	0003676 // nucleic acid binding // inferred from electronic annotation /// 0003950 // NAD+ ADP-ribosyltransferase activity // inferred from electronic annotation /// 0008270 // zinc ion binding // inferred from electronic annotation /// 0016740 // transferase activity // inferred from electronic annotation /// 0046872 // metal ion binding // inferred from electronic annotation	6.00514	4.86112	5.20623	9.83837	9.94688	10.1438	7.93246	7.14639	7.79168	9.97635	5.3575	7.62351
1424727_at	chemokine (C-C motif) receptor 5	Ccr5	937.423	39.9458	23.4674	0.00316589	Yes	No	0002437 // inflammatory response to antigenic stimulus // inferred from electronic annotation /// 0006952 // defense response // inferred from mutant phenotype /// 0007165 // signal transduction // inferred from electronic annotation /// 0007186 // G-protein coupled receptor protein signaling pathway // inferred from electronic annotation /// 0042742 // defense response to bacterium // inferred f…	0005768 // endosome // inferred from electronic annotation /// 0005886 // plasma membrane // inferred from electronic annotation /// 0009897 // external side of plasma membrane // inferred from direct assay /// 0009897 // external side of plasma membrane // not recorded /// 0016020 // membrane // inferred from electronic annotation /// 0016021 // integral to membrane // inferred from electronic a…	0004871 // signal transducer activity // inferred from electronic annotation /// 0004872 // receptor activity // inferred from electronic annotation /// 0004930 // G-protein coupled receptor activity // inferred from electronic annotation /// 0016493 // C-C chemokine receptor activity // inferred from direct assay /// 0016493 // C-C chemokine receptor activity // not recorded /// 0016493 // C-C c…	5.24517	5.55	5.16475	9.77647	9.7622	10.079	7.60787	7.30667	7.07738	9.87256	5.31997	7.33064
1434437_x_at	ribonucleotide reductase M2	Rrm2	2815.55	124.307	22.65	0.00430444	Yes	No	0006260 // DNA replication // inferred from electronic annotation /// 0009186 // deoxyribonucleoside diphosphate metabolic process // inferred from electronic annotation /// 0009262 // deoxyribonucleotide metabolic process // inferred from direct assay /// 0009263 // deoxyribonucleotide biosynthetic process // inferred from direct assay /// 0009263 // deoxyribonucleotide biosynthetic process // i…	0005737 // cytoplasm // inferred from electronic annotation	0004748 // ribonucleoside-diphosphate reductase activity // inferred from direct assay /// 0004748 // ribonucleoside-diphosphate reductase activity // inferred from mutant phenotype /// 0004748 // ribonucleoside-diphosphate reductase activity // inferred from physical interaction /// 0004748 // ribonucleoside-diphosphate reductase activity // inferred from electronic annotation /// 0005506 // iro…	7.25056	6.4602	7.16252	11.5044	11.6599	11.2133	11.3101	10.7641	10.8229	11.4592	6.95776	10.9657
1416343_a_at	lysosomal-associated membrane protein 2	Lamp2	297.672	13.1674	22.6067	0.00248757	Yes	No	---	0005624 // membrane fraction // not recorded /// 0005764 // lysosome // inferred from direct assay /// 0005764 // lysosome // not recorded /// 0005764 // lysosome // inferred from electronic annotation /// 0005765 // lysosomal membrane // not recorded /// 0005765 // lysosomal membrane // inferred from electronic annotation /// 0005768 // endosome // inferred from electronic annotation /// 0005770…	---	3.69355	3.81579	3.64737	8.17063	8.08443	8.39768	6.40001	5.55497	6.04208	8.21758	3.7189	5.99902
1422430_at	fidgetin-like 1	Fignl1	646.835	29.7709	21.727	0.00446103	Yes	No	0046034 // ATP metabolic process // inferred from sequence or structural similarity	---	0000166 // nucleotide binding // inferred from electronic annotation /// 0000287 // magnesium ion binding // inferred from electronic annotation /// 0000287 // magnesium ion binding // inferred from sequence or structural similarity /// 0005524 // ATP binding // inferred from electronic annotation /// 0016787 // hydrolase activity // inferred from electronic annotation /// 0016787 // hydrolase ac…	4.80437	5.38823	4.4949	9.17966	9.64338	9.18872	8.50931	8.17174	8.16241	9.33725	4.89583	8.28115
1421186_at	chemokine (C-C motif) receptor 2	Ccr2	2943.87	136.804	21.5189	0.00414948	Yes	No	0006954 // inflammatory response // inferred from mutant phenotype /// 0006955 // immune response // inferred from mutant phenotype /// 0006959 // humoral immune response // inferred from mutant phenotype /// 0006968 // cellular defense response // inferred from mutant phenotype /// 0007165 // signal transduction // inferred from electronic annotation /// 0007186 // G-protein coupled receptor pro…	0005886 // plasma membrane // not recorded /// 0005886 // plasma membrane // inferred from electronic annotation /// 0016020 // membrane // inferred from electronic annotation /// 0016021 // integral to membrane // inferred from electronic annotation	0004871 // signal transducer activity // inferred from electronic annotation /// 0004872 // receptor activity // inferred from electronic annotation /// 0004930 // G-protein coupled receptor activity // inferred from electronic annotation /// 0005515 // protein binding // inferred from physical interaction /// 0005515 // protein binding // not recorded /// 0016493 // C-C chemokine receptor activi…	7.04595	6.85657	7.38539	11.3825	11.3739	11.8141	9.20331	9.10042	9.11213	11.5235	7.09597	9.13862
1454694_a_at	topoisomerase (DNA) II alpha	Top2a	3435.81	159.967	21.4782	0.00430444	Yes	No	0006259 // DNA metabolic process // inferred from electronic annotation /// 0006265 // DNA topological change // inferred from direct assay /// 0006265 // DNA topological change // inferred from electronic annotation /// 0007059 // chromosome segregation // inferred from direct assay /// 0007059 // chromosome segregation // inferred from mutant phenotype /// 0030261 // chromosome condensation // …	0000793 // condensed chromosome // inferred from direct assay /// 0005634 // nucleus // inferred from direct assay /// 0005634 // nucleus // inferred from electronic annotation /// 0005694 // chromosome // inferred from electronic annotation /// 0005730 // nucleolus // inferred from direct assay	0000166 // nucleotide binding // inferred from electronic annotation /// 0003677 // DNA binding // inferred from electronic annotation /// 0003916 // DNA topoisomerase activity // inferred from electronic annotation /// 0003918 // DNA topoisomerase (ATP-hydrolyzing) activity // inferred from direct assay /// 0003918 // DNA topoisomerase (ATP-hydrolyzing) activity // inferred from genetic interact…	7.24584	7.17742	7.54164	11.9264	12.0668	11.2461	11.156	10.6879	10.7573	11.7464	7.32163	10.8671
1450194_a_at	myeloblastosis oncogene	Myb	898.48	42.5571	21.1124	0.00459075	Yes	No	0000082 // G1/S transition of mitotic cell cycle // inferred from mutant phenotype /// 0001701 // in utero embryonic development // inferred from mutant phenotype /// 0006350 // transcription // inferred from electronic annotation /// 0006355 // regulation of transcription, DNA-dependent // inferred from direct assay /// 0006355 // regulation of transcription, DNA-dependent // inferred from mutan…	0005634 // nucleus // inferred from direct assay /// 0005634 // nucleus // inferred from electronic annotation	0003677 // DNA binding // inferred from direct assay /// 0003677 // DNA binding // inferred from electronic annotation /// 0003700 // transcription factor activity // inferred from direct assay /// 0003700 // transcription factor activity // inferred from mutant phenotype /// 0005515 // protein binding // inferred from physical interaction /// 0030528 // transcription regulator activity // inferr…	5.55289	5.4409	5.24019	10.3218	9.31	9.80223	8.60838	8.36061	8.22988	9.81134	5.41133	8.39962
1417266_at	chemokine (C-C motif) ligand 6	Ccl6	641.369	32.1054	19.977	0.00430444	Yes	No	0006935 // chemotaxis // inferred from electronic annotation /// 0006955 // immune response // inferred from electronic annotation	0005576 // extracellular region // inferred from electronic annotation /// 0005615 // extracellular space // inferred from electronic annotation	0005125 // cytokine activity // inferred from electronic annotation /// 0008009 // chemokine activity // inferred from electronic annotation	5.19415	5.00489	4.81519	9.50339	8.8277	9.64394	6.18586	5.0586	5.79923	9.32501	5.00474	5.68123
1416802_a_at	cell division cycle associated 5	Cdca5	938.585	47.0983	19.9282	0.00430444	Yes	No	0000082 // G1/S transition of mitotic cell cycle // inferred from sequence or structural similarity /// 0007049 // cell cycle // inferred from electronic annotation /// 0007067 // mitosis // inferred from direct assay /// 0007067 // mitosis // inferred from electronic annotation /// 0007076 // mitotic chromosome condensation // inferred from sequence or structural similarity /// 0007080 // mitoti…	0005634 // nucleus // inferred from direct assay /// 0005634 // nucleus // inferred from electronic annotation /// 0005737 // cytoplasm // inferred from direct assay	0005515 // protein binding // inferred from physical interaction	5.64798	5.45191	5.57292	9.99263	10.2226	9.4078	9.65894	9.09776	8.95474	9.87434	5.5576	9.23715
1417719_at	sin3 associated polypeptide	Sap30	706.448	36.9067	19.1415	0.00430444	Yes	No	0000122 // negative regulation of transcription from RNA polymerase II promoter // inferred from direct assay /// 0006350 // transcription // inferred from electronic annotation /// 0006355 // regulation of transcription, DNA-dependent // inferred from electronic annotation	0000118 // histone deacetylase complex // inferred from electronic annotation /// 0005634 // nucleus // inferred from electronic annotation /// 0016580 // Sin3 complex // not recorded	0003714 // transcription corepressor activity // inferred from electronic annotation /// 0005515 // protein binding // inferred from physical interaction /// 0005515 // protein binding // inferred from electronic annotation	5.42558	5.08927	5.10258	9.93935	9.13072	9.32325	7.21725	7.22207	6.77152	9.46444	5.20581	7.07028
1424278_a_at	baculoviral IAP repeat-containing 5	Birc5	478.094	25.1954	18.9755	0.00430444	Yes	No	0000086 // G2/M transition of mitotic cell cycle // inferred from sequence or structural similarity /// 0000226 // microtubule cytoskeleton organization // inferred from mutant phenotype /// 0000910 // cytokinesis // inferred from sequence or structural similarity /// 0006915 // apoptosis // inferred from electronic annotation /// 0006916 // anti-apoptosis // inferred from mutant phenotype /// 00…	0000775 // chromosome, centromeric region // not recorded /// 0000775 // chromosome, centromeric region // inferred from electronic annotation /// 0000775 // chromosome, centromeric region // inferred from sequence or structural similarity /// 0005622 // intracellular // inferred from electronic annotation /// 0005634 // nucleus // inferred from electronic annotation /// 0005694 // chromosome // …	0004866 // endopeptidase inhibitor activity // inferred from electronic annotation /// 0004869 // cysteine protease inhibitor activity // inferred from electronic annotation /// 0005515 // protein binding // inferred from sequence or structural similarity /// 0008017 // microtubule binding // inferred from sequence or structural similarity /// 0008270 // zinc ion binding // inferred from electron…	4.80437	4.53285	4.62804	9.09225	9.1771	8.4341	7.19395	6.77945	6.91724	8.90115	4.65509	6.96355
1417910_at	cyclin A2	Ccna2	572.485	30.8898	18.5331	0.00492234	Yes	No	0007049 // cell cycle // inferred from electronic annotation /// 0007067 // mitosis // inferred from electronic annotation /// 0045941 // positive regulation of transcription // inferred from genetic interaction /// 0045941 // positive regulation of transcription // inferred from mutant phenotype /// 0051301 // cell division // inferred from electronic annotation	0001939 // female pronucleus // inferred from direct assay /// 0001940 // male pronucleus // inferred from direct assay /// 0005634 // nucleus // inferred from direct assay /// 0005634 // nucleus // not recorded /// 0005634 // nucleus // inferred from electronic annotation /// 0005737 // cytoplasm // inferred from direct assay /// 0005737 // cytoplasm // inferred from electronic annotation	0005515 // protein binding // inferred from physical interaction	5.11257	5.06917	4.66544	9.06362	9.73711	8.68255	8.30695	7.63834	7.76077	9.16109	4.94906	7.90202
1436847_s_at	cell division cycle associated 8	Cdca8	1898.4	105.257	18.0359	0.00496293	Yes	No	0007049 // cell cycle // inferred from electronic annotation /// 0007067 // mitosis // inferred from electronic annotation /// 0051301 // cell division // inferred from electronic annotation	0000775 // chromosome, centromeric region // inferred from electronic annotation /// 0005634 // nucleus // inferred from electronic annotation /// 0005694 // chromosome // inferred from electronic annotation /// 0005737 // cytoplasm // inferred from electronic annotation /// 0043234 // protein complex // inferred from sequence or structural similarity	0005515 // protein binding // inferred from sequence or structural similarity	6.84942	6.42122	6.88267	10.9119	11.4091	10.3507	10.9358	10.5641	10.1892	10.8906	6.71777	10.563
1451313_a_at	RIKEN cDNA 1110067D22 gene	1110067D22Rik	526.439	29.5192	17.8338	0.00397645	Yes	No	---	---	0005529 // sugar binding // inferred from electronic annotation	4.98916	4.58268	5.07891	9.01477	9.24872	8.85688	6.70276	6.59107	7.02188	9.04012	4.88358	6.7719
1436203_a_at	RIKEN cDNA 1110059G02 gene	1110059G02Rik	787.639	45.5234	17.3018	0.00397645	Yes	No	---	---	---	5.63427	5.18705	5.70429	9.64291	9.75401	9.46725	8.04147	8.09494	6.93999	9.62139	5.50854	7.69213
1452912_at	defective in sister chromatid cohesion 1 homolog (S. cerevisiae)	Dscc1	348.389	20.2142	17.2349	0.00486386	Yes	No	0006260 // DNA replication // inferred from electronic annotation /// 0007049 // cell cycle // inferred from electronic annotation	0005634 // nucleus // inferred from electronic annotation	0003677 // DNA binding // inferred from electronic annotation	4.03883	4.1149	4.85816	8.54355	8.72073	8.06939	6.32756	5.98929	6.33332	8.44456	4.3373	6.21672
1417898_a_at	granzyme A	Gzma	718.875	43.2694	16.6139	0.00459075	Yes	No	0006508 // proteolysis // inferred from electronic annotation /// 0006915 // apoptosis // inferred from electronic annotation /// 0006922 // cleavage of lamin // inferred from sequence or structural similarity /// 0019835 // cytolysis // inferred from electronic annotation	0005576 // extracellular region // inferred from electronic annotation	0003824 // catalytic activity // inferred from electronic annotation /// 0004252 // serine-type endopeptidase activity // inferred from electronic annotation /// 0004252 // serine-type endopeptidase activity // inferred from sequence or structural similarity /// 0005515 // protein binding // inferred from sequence or structural similarity /// 0008233 // peptidase activity // inferred from electro…	5.07712	5.78741	5.4413	9.73773	9.07781	9.65325	7.45228	6.47792	6.80386	9.4896	5.43528	6.91135
1448466_at	cell division cycle associated 5	Cdca5	332.382	20.3338	16.3462	0.00440516	Yes	No	0000082 // G1/S transition of mitotic cell cycle // inferred from sequence or structural similarity /// 0007049 // cell cycle // inferred from electronic annotation /// 0007067 // mitosis // inferred from direct assay /// 0007067 // mitosis // inferred from electronic annotation /// 0007076 // mitotic chromosome condensation // inferred from sequence or structural similarity /// 0007080 // mitoti…	0005634 // nucleus // inferred from direct assay /// 0005634 // nucleus // inferred from electronic annotation /// 0005737 // cytoplasm // inferred from direct assay	0005515 // protein binding // inferred from physical interaction	4.7006	4.0348	4.30203	8.38431	8.69864	8.04714	8.09507	7.38141	7.49049	8.3767	4.34581	7.65566
1448627_s_at	PDZ binding kinase	Pbk	835.722	53.7077	15.5606	0.00430444	Yes	No	0006468 // protein amino acid phosphorylation // inferred from electronic annotation /// 0018105 // peptidyl-serine phosphorylation // not recorded /// 0018107 // peptidyl-threonine phosphorylation // not recorded	---	0000166 // nucleotide binding // inferred from electronic annotation /// 0004672 // protein kinase activity // inferred from electronic annotation /// 0004674 // protein serine/threonine kinase activity // not recorded /// 0004674 // protein serine/threonine kinase activity // inferred from electronic annotation /// 0005515 // protein binding // not recorded /// 0005515 // protein binding // infe…	5.82409	5.54389	5.87319	10.0629	9.73829	9.31945	8.48064	7.93546	7.90909	9.70688	5.74706	8.1084
1418322_at	cAMP responsive element modulator	Crem	1162.82	75.6319	15.3747	0.0046807	Yes	No	0006350 // transcription // inferred from electronic annotation /// 0006355 // regulation of transcription, DNA-dependent // inferred from electronic annotation /// 0007283 // spermatogenesis // inferred from mutant phenotype /// 0007283 // spermatogenesis // traceable author statement	0005634 // nucleus // inferred from direct assay /// 0005634 // nucleus // inferred from electronic annotation /// 0005667 // transcription factor complex // inferred from direct assay	0003677 // DNA binding // inferred from direct assay /// 0003677 // DNA binding // inferred from electronic annotation /// 0003700 // transcription factor activity // inferred from electronic annotation /// 0005515 // protein binding // inferred from electronic annotation /// 0043565 // sequence-specific DNA binding // inferred from electronic annotation /// 0046983 // protein dimerization activi…	6.18295	6.50826	6.03156	10.2065	9.71944	10.6243	7.85766	8.01204	7.82998	10.1834	6.24092	7.89989
1424128_x_at	aurora kinase B	Aurkb	365.694	24.148	15.1439	0.0046807	Yes	No	0000910 // cytokinesis // inferred from electronic annotation /// 0006468 // protein amino acid phosphorylation // inferred from electronic annotation /// 0007049 // cell cycle // inferred from direct assay /// 0007049 // cell cycle // inferred from electronic annotation /// 0007067 // mitosis // inferred from electronic annotation /// 0051301 // cell division // inferred from electronic annotati…	0000775 // chromosome, centromeric region // inferred from electronic annotation /// 0005634 // nucleus // inferred from electronic annotation /// 0005694 // chromosome // inferred from electronic annotation /// 0005819 // spindle // inferred from electronic annotation /// 0030496 // midbody // inferred from electronic annotation	0000166 // nucleotide binding // inferred from electronic annotation /// 0000287 // magnesium ion binding // inferred from electronic annotation /// 0004672 // protein kinase activity // inferred from electronic annotation /// 0004674 // protein serine/threonine kinase activity // inferred from electronic annotation /// 0005515 // protein binding // inferred from electronic annotation /// 0005524…	4.5024	4.7969	4.48219	8.49419	8.98949	8.0598	8.34551	7.5529	7.7681	8.51449	4.59383	7.88884
1419082_at	serine (or cysteine) peptidase inhibitor, clade B, member 2	Serpinb2	199.504	13.2297	15.08	0.00440516	Yes	No	---	0005576 // extracellular region // inferred from electronic annotation /// 0005737 // cytoplasm // inferred from electronic annotation	0004252 // serine-type endopeptidase activity // inferred from electronic annotation /// 0004866 // endopeptidase inhibitor activity // inferred from electronic annotation /// 0004867 // serine-type endopeptidase inhibitor activity // inferred from electronic annotation	4.02096	3.38233	3.77384	7.32317	7.63326	7.9644	3.80455	3.10518	3.52002	7.64028	3.72571	3.47658
1448213_at	annexin A1	Anxa1	812.34	54.13	15.0072	0.0046807	Yes	No	0007049 // cell cycle // inferred from mutant phenotype /// 0007165 // signal transduction // inferred from mutant phenotype /// 0042127 // regulation of cell proliferation // inferred from mutant phenotype /// 0050482 // arachidonic acid secretion // inferred from mutant phenotype	0005634 // nucleus // inferred from electronic annotation /// 0005737 // cytoplasm // inferred from electronic annotation /// 0005886 // plasma membrane // inferred from electronic annotation /// 0005929 // cilium // inferred from electronic annotation /// 0016020 // membrane // inferred from electronic annotation /// 0016323 // basolateral plasma membrane // inferred from electronic annotation /…	0004859 // phospholipase inhibitor activity // inferred from electronic annotation /// 0005509 // calcium ion binding // inferred from electronic annotation /// 0005515 // protein binding // inferred from physical interaction /// 0005544 // calcium-dependent phospholipid binding // inferred from electronic annotation /// 0019834 // phospholipase A2 inhibitor activity // inferred from electronic a…	5.37982	5.6801	6.21515	9.80726	9.84644	9.34412	8.78255	7.98115	8.74175	9.66594	5.75836	8.50182
1451246_s_at	aurora kinase B	Aurkb	339.156	22.6429	14.9784	0.00458143	Yes	No	0000910 // cytokinesis // inferred from electronic annotation /// 0006468 // protein amino acid phosphorylation // inferred from electronic annotation /// 0007049 // cell cycle // inferred from direct assay /// 0007049 // cell cycle // inferred from electronic annotation /// 0007067 // mitosis // inferred from electronic annotation /// 0051301 // cell division // inferred from electronic annotati…	0000775 // chromosome, centromeric region // inferred from electronic annotation /// 0005634 // nucleus // inferred from electronic annotation /// 0005694 // chromosome // inferred from electronic annotation /// 0005819 // spindle // inferred from electronic annotation /// 0030496 // midbody // inferred from electronic annotation	0000166 // nucleotide binding // inferred from electronic annotation /// 0000287 // magnesium ion binding // inferred from electronic annotation /// 0004672 // protein kinase activity // inferred from electronic annotation /// 0004674 // protein serine/threonine kinase activity // inferred from electronic annotation /// 0005515 // protein binding // inferred from electronic annotation /// 0005524…	4.26305	4.58926	4.65066	8.41551	8.81986	7.98204	8.17981	7.61525	7.62511	8.4058	4.50099	7.80672
1428104_at	TPX2, microtubule-associated protein homolog (Xenopus laevis)	Tpx2	425.63	28.4445	14.9635	0.00466271	Yes	No	0051225 // spindle assembly // not recorded	0000922 // spindle pole // inferred from electronic annotation /// 0005634 // nucleus // not recorded /// 0005818 // aster // not recorded /// 0005876 // spindle microtubule // not recorded	0005515 // protein binding // inferred from electronic annotation /// 0019901 // protein kinase binding // not recorded	4.57356	5.1263	4.79038	9.02122	8.90979	8.26936	7.45593	7.02523	6.93107	8.73346	4.83008	7.13741
1420338_at	arachidonate 15-lipoxygenase	Alox15	376.54	25.2987	14.8838	0.00430444	Yes	No	0001503 // ossification // inferred from mutant phenotype /// 0006691 // leukotriene metabolic process // inferred from electronic annotation /// 0019370 // leukotriene biosynthetic process // inferred from electronic annotation /// 0030282 // bone mineralization // inferred from mutant phenotype /// 0055114 // oxidation reduction // inferred from electronic annotation	0005737 // cytoplasm // inferred from electronic annotation /// 0005829 // cytosol // inferred from electronic annotation	0004052 // arachidonate 12-lipoxygenase activity // inferred from electronic annotation /// 0005506 // iron ion binding // inferred from electronic annotation /// 0016165 // lipoxygenase activity // inferred from electronic annotation /// 0016491 // oxidoreductase activity // inferred from electronic annotation /// 0016702 // oxidoreductase activity, acting on single donors with incorporation of …	4.57477	4.99251	4.41569	8.50511	8.86971	8.29516	5.04783	4.15883	4.88456	8.55666	4.66099	4.69707
1435327_at	lysophosphatidylglycerol acyltransferase 1	Lpgat1	394.243	26.5303	14.8601	0.00269686	Yes	No	0008152 // metabolic process // inferred from electronic annotation /// 0008654 // phospholipid biosynthetic process // inferred from electronic annotation	0005737 // cytoplasm // inferred from electronic annotation /// 0005783 // endoplasmic reticulum // inferred from electronic annotation /// 0005789 // endoplasmic reticulum membrane // inferred from electronic annotation /// 0016020 // membrane // inferred from electronic annotation /// 0016021 // integral to membrane // inferred from electronic annotation	0008415 // acyltransferase activity // inferred from electronic annotation /// 0016740 // transferase activity // inferred from electronic annotation	4.92154	4.64632	4.62085	8.59169	8.75217	8.52496	7.94431	7.49276	7.27727	8.62294	4.72957	7.57145
1417541_at	helicase, lymphoid specific	Hells	612.049	41.697	14.6785	0.00414948	Yes	No	0001655 // urogenital system development // inferred from mutant phenotype /// 0006306 // DNA methylation // inferred from mutant phenotype /// 0006342 // chromatin silencing // inferred from mutant phenotype /// 0006346 // methylation-dependent chromatin silencing // inferred from mutant phenotype /// 0006350 // transcription // inferred from electronic annotation /// 0006355 // regulation of tr…	0000775 // chromosome, centromeric region // inferred from direct assay /// 0005634 // nucleus // inferred from direct assay /// 0005634 // nucleus // inferred from electronic annotation /// 0005721 // centromeric heterochromatin // inferred from direct assay	0000166 // nucleotide binding // inferred from electronic annotation /// 0003676 // nucleic acid binding // inferred from electronic annotation /// 0003677 // DNA binding // inferred from electronic annotation /// 0003682 // chromatin binding // inferred from direct assay /// 0004386 // helicase activity // inferred from electronic annotation /// 0005524 // ATP binding // inferred from electronic…	5.27657	5.36537	5.50367	8.98611	9.59969	9.18671	8.2988	8.04638	8.27315	9.2575	5.38187	8.20611
1417926_at	non-SMC condensin II complex, subunit G2	Ncapg2	490.57	33.8879	14.4763	0.00417426	Yes	No	0001833 // inner cell mass cell proliferation // inferred from mutant phenotype /// 0007049 // cell cycle // inferred from electronic annotation /// 0007067 // mitosis // inferred from electronic annotation /// 0007076 // mitotic chromosome condensation // inferred from electronic annotation /// 0051301 // cell division // inferred from electronic annotation	0005634 // nucleus // inferred from electronic annotation	0005488 // binding // inferred from electronic annotation /// 0005515 // protein binding // inferred from physical interaction	5.31711	4.76535	5.16563	9.00802	9.08439	8.72254	7.86441	7.36048	7.62413	8.93832	5.0827	7.61634
1427707_a_at	Scl/Tal1 interrupting locus	Stil	226.518	15.7462	14.3856	0.00470066	Yes	No	0007275 // multicellular organismal development // inferred from electronic annotation	0005737 // cytoplasm // inferred from electronic annotation	---	3.84772	3.87745	4.20562	7.87674	8.26171	7.332	7.17605	6.46975	6.81481	7.82348	3.97693	6.8202
1449037_at	cAMP responsive element modulator	Crem	2089.44	146.859	14.2276	0.00459075	Yes	No	0006350 // transcription // inferred from electronic annotation /// 0006355 // regulation of transcription, DNA-dependent // inferred from electronic annotation /// 0007283 // spermatogenesis // inferred from mutant phenotype /// 0007283 // spermatogenesis // traceable author statement	0005634 // nucleus // inferred from direct assay /// 0005634 // nucleus // inferred from electronic annotation /// 0005667 // transcription factor complex // inferred from direct assay	0003677 // DNA binding // inferred from direct assay /// 0003677 // DNA binding // inferred from electronic annotation /// 0003700 // transcription factor activity // inferred from electronic annotation /// 0005515 // protein binding // inferred from electronic annotation /// 0043565 // sequence-specific DNA binding // inferred from electronic annotation /// 0046983 // protein dimerization activi…	7.12895	6.91699	7.54891	11.0721	10.6664	11.3482	7.98368	7.98368	7.73104	11.0289	7.19828	7.89947
1421855_at	fibrinogen-like protein 2	Fgl2	782.359	55.1602	14.1834	0.0046807	Yes	No	0007165 // signal transduction // inferred from electronic annotation /// 0019835 // cytolysis // inferred from electronic annotation	0005576 // extracellular region // inferred from electronic annotation	0005102 // receptor binding // inferred from electronic annotation	5.60769	5.56485	6.18413	9.42469	10.0159	9.39447	8.38695	8.11153	8.30529	9.61169	5.78556	8.26792
1416579_a_at	epithelial cell adhesion molecule	Epcam	1288.77	90.9539	14.1695	0.00459075	Yes	No	---	0005886 // plasma membrane // inferred from electronic annotation /// 0016021 // integral to membrane // inferred from electronic annotation /// 0016323 // basolateral plasma membrane // inferred from sequence or structural similarity /// 0016324 // apical plasma membrane // inferred from sequence or structural similarity	---	6.52522	6.71445	6.28152	10.7256	9.91603	10.3537	8.27566	8.27315	7.89185	10.3318	6.50706	8.14689
1434695_at	denticleless homolog (Drosophila)	Dtl	603.302	43.1352	13.9863	0.00430444	Yes	No	0006260 // DNA replication // inferred from electronic annotation /// 0006511 // ubiquitin-dependent protein catabolic process // inferred from electronic annotation /// 0006974 // response to DNA damage stimulus // inferred from electronic annotation	0005634 // nucleus // inferred from electronic annotation /// 0005737 // cytoplasm // inferred from electronic annotation /// 0016020 // membrane // inferred from electronic annotation /// 0031965 // nuclear membrane // inferred from electronic annotation	---	5.12683	5.83083	5.33472	9.18269	9.21356	9.31396	8.61662	8.15722	7.90692	9.23674	5.43079	8.22692
1416120_at	ribonucleotide reductase M2	Rrm2	909.069	66.8162	13.6055	0.00397645	Yes	No	0006260 // DNA replication // inferred from electronic annotation /// 0009186 // deoxyribonucleoside diphosphate metabolic process // inferred from electronic annotation /// 0009262 // deoxyribonucleotide metabolic process // inferred from direct assay /// 0009263 // deoxyribonucleotide biosynthetic process // inferred from direct assay /// 0009263 // deoxyribonucleotide biosynthetic process // i…	0005737 // cytoplasm // inferred from electronic annotation	0004748 // ribonucleoside-diphosphate reductase activity // inferred from direct assay /// 0004748 // ribonucleoside-diphosphate reductase activity // inferred from mutant phenotype /// 0004748 // ribonucleoside-diphosphate reductase activity // inferred from physical interaction /// 0004748 // ribonucleoside-diphosphate reductase activity // inferred from electronic annotation /// 0005506 // iro…	5.7937	6.14184	6.25084	9.83118	9.99688	9.65668	8.86234	8.22264	7.9942	9.82825	6.06213	8.35973
1436325_at	RAR-related orphan receptor alpha	Rora	1032.23	77.4944	13.3201	0.00430444	Yes	No	0006350 // transcription // inferred from electronic annotation /// 0006355 // regulation of transcription, DNA-dependent // inferred from direct assay /// 0006355 // regulation of transcription, DNA-dependent // inferred from electronic annotation /// 0006809 // nitric oxide biosynthetic process // inferred from mutant phenotype /// 0021702 // cerebellar Purkinje cell differentiation // inferred…	0005634 // nucleus // inferred from electronic annotation	0003677 // DNA binding // inferred from direct assay /// 0003677 // DNA binding // inferred from electronic annotation /// 0003700 // transcription factor activity // inferred from direct assay /// 0003700 // transcription factor activity // not recorded /// 0003700 // transcription factor activity // inferred from electronic annotation /// 0003707 // steroid hormone receptor activity // inferred…	6.2327	6.56148	6.03388	9.80745	9.9459	10.2813	9.29826	9.30053	8.93523	10.0115	6.27602	9.17801
1447363_s_at	budding uninhibited by benzimidazoles 1 homolog, beta (S. cerevisiae)	Bub1b	518.435	40.1953	12.8979	0.00492234	Yes	No	0006468 // protein amino acid phosphorylation // inferred from electronic annotation /// 0006915 // apoptosis // inferred from electronic annotation /// 0007049 // cell cycle // inferred from electronic annotation /// 0007067 // mitosis // inferred from electronic annotation /// 0007091 // mitotic metaphase/anaphase transition // inferred from genetic interaction /// 0045786 // negative regulatio…	0000776 // kinetochore // inferred from direct assay /// 0000776 // kinetochore // inferred from mutant phenotype /// 0000776 // kinetochore // not recorded /// 0000777 // condensed chromosome kinetochore // inferred from electronic annotation /// 0000940 // outer kinetochore of condensed chromosome // inferred from direct assay /// 0005634 // nucleus // inferred from electronic annotation /// 00…	0000166 // nucleotide binding // inferred from electronic annotation /// 0004672 // protein kinase activity // inferred from electronic annotation /// 0004674 // protein serine/threonine kinase activity // inferred from electronic annotation /// 0005515 // protein binding // inferred from electronic annotation /// 0005524 // ATP binding // inferred from electronic annotation /// 0016301 // kinase…	5.08954	5.45345	5.44387	9.24775	9.326	8.48031	8.23272	7.95987	8.19216	9.01802	5.32895	8.12825
1434427_a_at	ring finger protein 157	Rnf157	979.777	76.6992	12.7743	0.00397645	Yes	No	---	---	0005515 // protein binding // inferred from electronic annotation /// 0008270 // zinc ion binding // inferred from electronic annotation /// 0046872 // metal ion binding // inferred from electronic annotation	6.39212	6.28448	6.10682	10.0514	9.65393	10.1036	9.57852	9.10295	8.47845	9.93631	6.26114	9.05331
1416076_at	cyclin B1 /// predicted gene, EG434175 /// predicted gene, EG667005	Ccnb1 /// EG434175 /// EG667005	434.586	34.0538	12.7617	0.00496477	Yes	No	0001701 // in utero embryonic development // inferred from mutant phenotype /// 0006468 // protein amino acid phosphorylation // inferred from direct assay /// 0007049 // cell cycle // inferred from electronic annotation /// 0007067 // mitosis // inferred from electronic annotation /// 0051301 // cell division // inferred from electronic annotation	0005624 // membrane fraction // inferred from direct assay /// 0005625 // soluble fraction // inferred from direct assay /// 0005634 // nucleus // inferred from direct assay /// 0005634 // nucleus // not recorded /// 0005634 // nucleus // inferred from electronic annotation /// 0005737 // cytoplasm // inferred from electronic annotation /// 0005813 // centrosome // inferred from electronic annota…	0005515 // protein binding // inferred from physical interaction /// 0016301 // kinase activity // inferred from direct assay	5.59518	5.11482	4.55923	8.75508	8.72315	8.81226	7.64652	6.72003	7.16726	8.7635	5.08974	7.17794
1440408_at	RIKEN cDNA B830008J18 gene	B830008J18Rik	391.188	31.3393	12.4823	0.00430444	Yes	No	---	---	---	4.75433	4.89895	5.25642	8.55373	8.36313	8.91829	7.96702	8.14565	7.42376	8.61172	4.9699	7.84548
1448314_at	cell division cycle 2 homolog A (S. pombe)	Cdc2a	485.209	39.2775	12.3534	0.00440516	Yes	No	0006468 // protein amino acid phosphorylation // inferred from direct assay /// 0006468 // protein amino acid phosphorylation // inferred from electronic annotation /// 0007049 // cell cycle // inferred from electronic annotation /// 0007067 // mitosis // inferred from electronic annotation /// 0007095 // mitotic cell cycle G2/M transition DNA damage checkpoint // inferred from direct assay /// 0…	0005634 // nucleus // not recorded /// 0005634 // nucleus // inferred from electronic annotation	0000166 // nucleotide binding // inferred from electronic annotation /// 0004672 // protein kinase activity // inferred from electronic annotation /// 0004674 // protein serine/threonine kinase activity // inferred from electronic annotation /// 0004693 // cyclin-dependent protein kinase activity // inferred from electronic annotation /// 0005515 // protein binding // inferred from physical inter…	5.35717	4.99802	5.5317	9.15955	9.04125	8.56659	8.18034	7.47045	7.93487	8.92246	5.29563	7.86189
1428369_s_at	Rho GTPase activating protein 21	Arhgap21	425.544	34.4808	12.3415	0.00305697	Yes	No	0007165 // signal transduction // inferred from electronic annotation	0000139 // Golgi membrane // inferred from electronic annotation /// 0005622 // intracellular // inferred from electronic annotation /// 0005737 // cytoplasm // inferred from electronic annotation /// 0005794 // Golgi apparatus // inferred from electronic annotation /// 0005856 // cytoskeleton // inferred from electronic annotation /// 0016020 // membrane // inferred from electronic annotation //…	0005096 // GTPase activator activity // inferred from electronic annotation /// 0005515 // protein binding // inferred from electronic annotation	5.22426	5.20065	4.89825	8.7015	8.85432	8.64367	6.76755	6.33925	7.1264	8.73316	5.10772	6.7444
1426817_at	antigen identified by monoclonal antibody Ki 67	Mki67	4152.41	338.465	12.2684	0.00430444	Yes	No	0007126 // meiosis // inferred from direct assay /// 0008283 // cell proliferation // inferred from direct assay	0000775 // chromosome, centromeric region // inferred from direct assay /// 0000793 // condensed chromosome // inferred from direct assay /// 0005622 // intracellular // inferred from direct assay /// 0005634 // nucleus // inferred from direct assay /// 0005730 // nucleolus // inferred from direct assay /// 0005737 // cytoplasm // inferred from direct assay	---	8.62267	8.20435	8.38157	12.0912	12.3158	11.6522	12.0245	11.6679	11.7155	12.0197	8.40286	11.8026
1424176_a_at	annexin A4	Anxa4	396.402	32.8014	12.0849	0.00470066	Yes	No	0001822 // kidney development // not recorded	0016324 // apical plasma membrane // not recorded	0005509 // calcium ion binding // inferred from electronic annotation /// 0005544 // calcium-dependent phospholipid binding // inferred from electronic annotation	4.98833	4.79278	5.32595	8.9272	8.18754	8.77772	6.61384	6.25948	6.07293	8.63082	5.03569	6.31542
1416318_at	serine (or cysteine) peptidase inhibitor, clade B, member 1a	Serpinb1a	394.208	32.7567	12.0344	0.00459075	Yes	No	0042176 // regulation of protein catabolic process // inferred from physical interaction	0005737 // cytoplasm // inferred from electronic annotation	0004866 // endopeptidase inhibitor activity // inferred from electronic annotation /// 0004867 // serine-type endopeptidase inhibitor activity // inferred from electronic annotation	4.73341	4.87204	5.49571	8.42452	8.6415	8.80242	7.67302	6.39824	6.77786	8.62281	5.03372	6.94971
1427615_at	integrin alpha 4	Itga4	159.506	13.2992	11.9936	0.00404779	Yes	No	0001974 // blood vessel remodeling // inferred from mutant phenotype /// 0007155 // cell adhesion // inferred from mutant phenotype /// 0007155 // cell adhesion // inferred from electronic annotation /// 0007157 // heterophilic cell adhesion // inferred from mutant phenotype /// 0007159 // leukocyte adhesion // inferred from mutant phenotype /// 0007159 // leukocyte adhesion // inferred from elec…	0008305 // integrin complex // inferred from electronic annotation /// 0009897 // external side of plasma membrane // inferred from direct assay /// 0009986 // cell surface // inferred from electronic annotation /// 0016020 // membrane // inferred from electronic annotation /// 0016021 // integral to membrane // inferred from electronic annotation	0001968 // fibronectin binding // inferred from mutant phenotype /// 0004872 // receptor activity // inferred from electronic annotation /// 0005509 // calcium ion binding // inferred from electronic annotation /// 0005515 // protein binding // inferred from electronic annotation /// 0042802 // identical protein binding // inferred from electronic annotation	3.68155	3.96652	3.55173	7.1465	7.27545	7.53044	6.43344	6.50527	6.30868	7.31746	3.73327	6.4158
1450744_at	elongation factor RNA polymerase II 2	Ell2	642.612	54.1042	11.8773	0.00459075	Yes	No	0006350 // transcription // inferred from electronic annotation /// 0006355 // regulation of transcription, DNA-dependent // inferred from electronic annotation /// 0006368 // RNA elongation from RNA polymerase II promoter // not recorded	0005634 // nucleus // inferred from electronic annotation	0008159 // positive transcription elongation factor activity // not recorded	5.99602	5.26138	6.01561	9.43671	9.24911	9.29759	8.73738	8.41061	7.78309	9.3278	5.75767	8.31036
1435306_a_at	kinesin family member 11	Kif11	170.743	14.4049	11.8531	0.00397645	Yes	No	0007018 // microtubule-based movement // inferred from electronic annotation /// 0007049 // cell cycle // inferred from electronic annotation /// 0007067 // mitosis // inferred from electronic annotation /// 0007100 // mitotic centrosome separation // inferred from mutant phenotype /// 0051300 // spindle pole body organization // inferred from electronic annotation /// 0051301 // cell division //…	0000922 // spindle pole // inferred from electronic annotation /// 0005874 // microtubule // inferred from electronic annotation /// 0005875 // microtubule associated complex // inferred from electronic annotation /// 0005876 // spindle microtubule // inferred from electronic annotation	0000166 // nucleotide binding // inferred from electronic annotation /// 0003774 // motor activity // inferred from electronic annotation /// 0003777 // microtubule motor activity // inferred from electronic annotation /// 0005524 // ATP binding // inferred from electronic annotation	3.64508	4.02313	3.87726	7.56598	7.49662	7.18446	8.02113	7.39049	8.0016	7.41569	3.84849	7.80441
1450920_at	cyclin B2	Ccnb2	995.647	84.8981	11.7276	0.00491091	Yes	No	0001701 // in utero embryonic development // inferred from mutant phenotype /// 0007049 // cell cycle // inferred from electronic annotation /// 0007067 // mitosis // inferred from electronic annotation /// 0040007 // growth // inferred from mutant phenotype /// 0043029 // T cell homeostasis // inferred from mutant phenotype /// 0048538 // thymus development // inferred from mutant phenotype /// …	0005624 // membrane fraction // inferred from direct assay /// 0005634 // nucleus // inferred from electronic annotation /// 0015630 // microtubule cytoskeleton // inferred from electronic annotation	0005515 // protein binding // inferred from electronic annotation	6.4372	6.50803	6.27775	10.1802	10.2859	9.41237	8.54529	7.77351	8.40974	9.95949	6.40766	8.24285
1438288_x_at	RIKEN cDNA 1110059G02 gene	1110059G02Rik	375.282	32.2299	11.6439	0.00417426	Yes	No	---	---	---	5.13697	4.99996	4.89405	8.53778	8.85496	8.26275	7.02016	6.86622	6.0372	8.55183	5.01033	6.64119
1428094_at	lysosomal-associated membrane protein 2	Lamp2	2095.05	180.884	11.5823	0.00446103	Yes	No	---	0005624 // membrane fraction // not recorded /// 0005764 // lysosome // inferred from direct assay /// 0005764 // lysosome // not recorded /// 0005764 // lysosome // inferred from electronic annotation /// 0005765 // lysosomal membrane // not recorded /// 0005765 // lysosomal membrane // inferred from electronic annotation /// 0005768 // endosome // inferred from electronic annotation /// 0005770…	---	7.76261	7.03563	7.69852	10.9062	11.108	11.0841	9.28491	8.94016	8.99614	11.0328	7.49892	9.07374
1435264_at	elastin microfibril interfacer 2	Emilin2	481.903	41.8827	11.506	0.00423022	Yes	No	0007155 // cell adhesion // inferred from electronic annotation	0005576 // extracellular region // inferred from electronic annotation /// 0005578 // proteinaceous extracellular matrix // inferred from electronic annotation	0005515 // protein binding // inferred from electronic annotation	5.24673	5.44085	5.47727	9.25385	8.70467	8.77928	6.59443	6.05834	6.36335	8.9126	5.38828	6.33871
1424629_at	breast cancer 1	Brca1	433.746	37.8223	11.468	0.00430444	Yes	No	0000724 // double-strand break repair via homologous recombination // inferred from electronic annotation /// 0006260 // DNA replication // inferred from mutant phenotype /// 0006281 // DNA repair // inferred from electronic annotation /// 0006301 // postreplication repair // inferred from electronic annotation /// 0006633 // fatty acid biosynthetic process // inferred from electronic annotation …	0000793 // condensed chromosome // inferred from direct assay /// 0005622 // intracellular // inferred from electronic annotation /// 0005634 // nucleus // inferred from electronic annotation /// 0005737 // cytoplasm // inferred from direct assay /// 0005813 // centrosome // traceable author statement /// 0031436 // BRCA1-BARD1 complex // inferred from electronic annotation	0003677 // DNA binding // inferred from electronic annotation /// 0003684 // damaged DNA binding // inferred from direct assay /// 0003723 // RNA binding // not recorded /// 0005515 // protein binding // inferred from electronic annotation /// 0005515 // protein binding // inferred from sequence or structural similarity /// 0008270 // zinc ion binding // inferred from electronic annotation /// 00…	5.58974	5.16491	4.96884	8.9206	8.85411	8.50741	8.56553	8.09766	7.74862	8.76071	5.24116	8.13727
1448167_at	interferon gamma receptor 1	Ifngr1	9109.15	806.181	11.2991	0.00446103	Yes	No	---	0005783 // endoplasmic reticulum // inferred from electronic annotation /// 0014069 // postsynaptic density // inferred from electronic annotation /// 0016020 // membrane // inferred from electronic annotation /// 0016021 // integral to membrane // inferred from electronic annotation /// 0030425 // dendrite // inferred from electronic annotation /// 0031982 // vesicle // inferred from electronic …	0004872 // receptor activity // inferred from electronic annotation /// 0019955 // cytokine binding // inferred from electronic annotation	10.0854	9.34892	9.53056	13.2473	12.9868	13.2252	11.6979	12.015	11.4331	13.1531	9.65496	11.7153
1424895_at	G-protein signalling modulator 2 (AGS3-like, C. elegans)	Gpsm2	400.687	36.0753	11.107	0.00430444	Yes	No	0007165 // signal transduction // inferred from electronic annotation	0005737 // cytoplasm // inferred from electronic annotation	0005096 // GTPase activator activity // inferred from electronic annotation /// 0005488 // binding // inferred from electronic annotation /// 0042802 // identical protein binding // inferred from electronic annotation	5.19187	4.89224	5.43471	8.80041	8.73885	8.39974	7.11965	6.67845	6.6217	8.64633	5.17294	6.8066
1416698_a_at	CDC28 protein kinase 1b	Cks1b	3784.45	341.981	11.0662	0.00430444	Yes	No	0007049 // cell cycle // inferred from electronic annotation /// 0051301 // cell division // inferred from electronic annotation	---	0016538 // cyclin-dependent protein kinase regulator activity // inferred from electronic annotation	8.38119	8.1546	8.71753	12.0324	11.9917	11.6335	11.0217	10.5427	10.3432	11.8859	8.41777	10.6359
1452011_a_at	UDP-glucuronate decarboxylase 1	Uxs1	528.142	47.8101	11.0467	0.0046807	Yes	No	0008152 // metabolic process // inferred from electronic annotation /// 0044237 // cellular metabolic process // inferred from electronic annotation	0005794 // Golgi apparatus // inferred from electronic annotation /// 0016020 // membrane // inferred from electronic annotation /// 0016021 // integral to membrane // inferred from electronic annotation	0003824 // catalytic activity // inferred from electronic annotation /// 0005488 // binding // inferred from electronic annotation /// 0016829 // lyase activity // inferred from electronic annotation /// 0016831 // carboxy-lyase activity // inferred from electronic annotation /// 0048040 // UDP-glucuronate decarboxylase activity // inferred from electronic annotation /// 0050662 // coenzyme bindi…	5.40835	5.51865	5.81073	9.2865	9.25367	8.59418	8.01456	8.13317	7.11487	9.04478	5.57924	7.7542
1417063_at	complement component 1, q subcomponent, beta polypeptide	C1qb	197.733	17.9771	10.9992	0.00397645	Yes	No	0006955 // immune response // inferred from electronic annotation /// 0006958 // complement activation, classical pathway // inferred from electronic annotation /// 0045087 // innate immune response // inferred from electronic annotation	0005576 // extracellular region // inferred from electronic annotation	0042803 // protein homodimerization activity // inferred from direct assay	3.96213	4.14459	4.39755	7.61904	7.80045	7.46275	5.01135	4.4557	4.73105	7.62741	4.16809	4.7327
1455030_at	protein tyrosine phosphatase, receptor type, J	Ptprj	142.518	13.0308	10.937	0.0046807	Yes	No	0001570 // vasculogenesis // inferred from mutant phenotype /// 0006470 // protein amino acid dephosphorylation // inferred from electronic annotation /// 0007507 // heart development // inferred from mutant phenotype /// 0016311 // dephosphorylation // inferred from electronic annotation	0016020 // membrane // inferred from electronic annotation /// 0016021 // integral to membrane // inferred from electronic annotation	0004721 // phosphoprotein phosphatase activity // inferred from electronic annotation /// 0004725 // protein tyrosine phosphatase activity // inferred from electronic annotation /// 0004872 // receptor activity // inferred from electronic annotation /// 0016787 // hydrolase activity // inferred from electronic annotation /// 0016791 // phosphatase activity // inferred from electronic annotation	4.14802	3.46519	3.49835	7.22128	7.3412	6.90253	6.58191	6.24193	6.13137	7.155	3.70385	6.3184
1419943_s_at	cyclin B1	Ccnb1	465.134	43.497	10.6935	0.00417426	Yes	No	0001701 // in utero embryonic development // inferred from mutant phenotype /// 0006468 // protein amino acid phosphorylation // inferred from direct assay /// 0007049 // cell cycle // inferred from electronic annotation /// 0007067 // mitosis // inferred from electronic annotation /// 0051301 // cell division // inferred from electronic annotation	0005624 // membrane fraction // inferred from direct assay /// 0005625 // soluble fraction // inferred from direct assay /// 0005634 // nucleus // inferred from direct assay /// 0005634 // nucleus // not recorded /// 0005634 // nucleus // inferred from electronic annotation /// 0005737 // cytoplasm // inferred from electronic annotation /// 0005813 // centrosome // inferred from electronic annota…	0005515 // protein binding // inferred from physical interaction /// 0016301 // kinase activity // inferred from direct assay	5.13058	5.69912	5.49883	8.84511	8.96488	8.77452	7.6177	6.81893	7.34687	8.8615	5.44284	7.26117
1450484_a_at	cytidine monophosphate (UMP-CMP) kinase 2, mitochondrial	Cmpk2	448.166	42.124	10.6392	0.00430444	Yes	No	0006221 // pyrimidine nucleotide biosynthetic process // inferred from electronic annotation	0005739 // mitochondrion // inferred from electronic annotation	0000166 // nucleotide binding // inferred from electronic annotation /// 0004127 // cytidylate kinase activity // inferred from electronic annotation /// 0005524 // ATP binding // inferred from electronic annotation /// 0016301 // kinase activity // inferred from electronic annotation /// 0016740 // transferase activity // inferred from electronic annotation	5.42949	5.27975	5.48047	8.49575	9.1501	8.77782	6.91523	6.27216	7.34563	8.80789	5.39657	6.84434
1419042_at	interferon inducible GTPase 1	Iigp1	2259.36	216.675	10.4274	0.00459075	Yes	No	0019221 // cytokine-mediated signaling pathway // traceable author statement	0005634 // nucleus // inferred from electronic annotation /// 0005737 // cytoplasm // inferred from electronic annotation /// 0005783 // endoplasmic reticulum // inferred from electronic annotation /// 0005789 // endoplasmic reticulum membrane // inferred from electronic annotation /// 0005794 // Golgi apparatus // inferred from electronic annotation /// 0016020 // membrane // inferred from elect…	0000166 // nucleotide binding // inferred from electronic annotation /// 0003924 // GTPase activity // inferred from direct assay /// 0003924 // GTPase activity // inferred from sequence or structural similarity /// 0005525 // GTP binding // inferred from direct assay /// 0005525 // GTP binding // inferred from electronic annotation /// 0016787 // hydrolase activity // inferred from electronic an…	7.83619	7.37281	8.06917	11.1684	11.3425	10.9142	9.90305	9.5102	10.0227	11.1417	7.75939	9.81198
1434316_at	chondroitin sulfate synthase 1 /// similar to mKIAA0990 protein	Chsy1 /// LOC100047167	902.842	86.9715	10.3809	0.00430444	Yes	No	0030206 // chondroitin sulfate biosynthetic process // not recorded	0005794 // Golgi apparatus // inferred from electronic annotation /// 0016020 // membrane // inferred from electronic annotation /// 0016021 // integral to membrane // inferred from electronic annotation	0016740 // transferase activity // inferred from electronic annotation /// 0046872 // metal ion binding // inferred from electronic annotation /// 0047238 // glucuronosyl-N-acetylgalactosaminyl-proteoglycan 4-beta-N-acetylgalactosaminyltransferase activity // not recorded /// 0047238 // glucuronosyl-N-acetylgalactosaminyl-proteoglycan 4-beta-N-acetylgalactosaminyltransferase activity // inferred …	6.53145	6.12632	6.66964	9.6099	10.049	9.79609	9.73801	9.26915	9.30055	9.81833	6.44247	9.4359
1424704_at	runt related transcription factor 2	Runx2	1358.31	131.343	10.3417	0.00260836	Yes	No	0001501 // skeletal system development // inferred from mutant phenotype /// 0001649 // osteoblast differentiation // inferred from genetic interaction /// 0001649 // osteoblast differentiation // inferred from mutant phenotype /// 0001958 // endochondral ossification // inferred from mutant phenotype /// 0002051 // osteoblast fate commitment // inferred from genetic interaction /// 0002062 // ch…	0005634 // nucleus // inferred from direct assay /// 0005634 // nucleus // inferred from electronic annotation /// 0005667 // transcription factor complex // inferred from direct assay /// 0005737 // cytoplasm // inferred from direct assay	0003677 // DNA binding // inferred from direct assay /// 0003677 // DNA binding // inferred from genetic interaction /// 0003677 // DNA binding // inferred from electronic annotation /// 0003682 // chromatin binding // inferred from direct assay /// 0003700 // transcription factor activity // traceable author statement /// 0003700 // transcription factor activity // inferred from electronic annot…	7.10763	6.86136	7.14261	10.4589	10.3216	10.4423	8.77972	8.24556	8.56077	10.4076	7.0372	8.52868
1423804_a_at	isopentenyl-diphosphate delta isomerase	Idi1	896.624	87.2335	10.2784	0.00430444	Yes	No	0006694 // steroid biosynthetic process // inferred from electronic annotation /// 0006695 // cholesterol biosynthetic process // inferred from electronic annotation /// 0008299 // isoprenoid biosynthetic process // inferred from electronic annotation /// 0008610 // lipid biosynthetic process // inferred from electronic annotation /// 0016117 // carotenoid biosynthetic process // inferred from el…	0005777 // peroxisome // inferred from electronic annotation	0000287 // magnesium ion binding // inferred from electronic annotation /// 0004452 // isopentenyl-diphosphate delta-isomerase activity // inferred from electronic annotation /// 0016787 // hydrolase activity // inferred from electronic annotation /// 0016853 // isomerase activity // inferred from electronic annotation /// 0046872 // metal ion binding // inferred from electronic annotation	6.53381	6.10866	6.69796	9.73406	10.0351	9.65592	8.06086	7.93618	7.59028	9.80836	6.44681	7.86244
1449708_s_at	checkpoint kinase 1 homolog (S. pombe)	Chek1	382.61	37.4549	10.2152	0.00320227	Yes	No	0000077 // DNA damage checkpoint // inferred from direct assay /// 0000077 // DNA damage checkpoint // inferred from mutant phenotype /// 0000086 // G2/M transition of mitotic cell cycle // inferred from mutant phenotype /// 0006281 // DNA repair // inferred from direct assay /// 0006281 // DNA repair // inferred from electronic annotation /// 0006468 // protein amino acid phosphorylation // infe…	0005634 // nucleus // inferred from direct assay /// 0005634 // nucleus // inferred from electronic annotation /// 0005654 // nucleoplasm // not recorded /// 0005657 // replication fork // inferred from direct assay /// 0005737 // cytoplasm // inferred from electronic annotation	0000166 // nucleotide binding // inferred from electronic annotation /// 0004672 // protein kinase activity // inferred from mutant phenotype /// 0004672 // protein kinase activity // inferred from electronic annotation /// 0004674 // protein serine/threonine kinase activity // inferred from electronic annotation /// 0005515 // protein binding // inferred from physical interaction /// 0005515 // …	5.41933	5.10289	5.15903	8.71244	8.46822	8.55853	8.18302	7.77581	7.95935	8.57973	5.22708	7.97273
1418264_at	centromere protein K	Cenpk	223.811	22.0331	10.1579	0.00492234	Yes	No	0045944 // positive regulation of transcription from RNA polymerase II promoter // inferred from direct assay	0000775 // chromosome, centromeric region // inferred from electronic annotation /// 0005634 // nucleus // inferred from direct assay /// 0005634 // nucleus // inferred from electronic annotation /// 0005694 // chromosome // inferred from electronic annotation	0005515 // protein binding // inferred from physical interaction	4.71889	4.53894	4.12698	8.02059	8.0008	7.39703	6.41102	6.11111	6.0552	7.80614	4.4616	6.19244
1443481_at	epsilon-tubulin 1	Tube1	155.914	15.4755	10.0749	0.00434304	Yes	No	0007017 // microtubule-based process // inferred from electronic annotation /// 0007018 // microtubule-based movement // inferred from electronic annotation /// 0051258 // protein polymerization // inferred from electronic annotation	0005813 // centrosome // inferred from electronic annotation /// 0005874 // microtubule // inferred from electronic annotation /// 0043234 // protein complex // inferred from electronic annotation	0000166 // nucleotide binding // inferred from electronic annotation /// 0003924 // GTPase activity // inferred from electronic annotation /// 0005198 // structural molecule activity // inferred from electronic annotation /// 0005525 // GTP binding // inferred from electronic annotation	3.81363	4.17076	3.87136	7.64366	7.15638	7.05378	6.59373	6.64302	5.8123	7.28461	3.95192	6.34968
1436004_at	ubiquitin specific peptidase 27, X chromosome	Usp27x	322.135	32.0545	10.0496	0.00260836	Yes	No	0006511 // ubiquitin-dependent protein catabolic process // inferred from electronic annotation	---	0004221 // ubiquitin thiolesterase activity // inferred from electronic annotation /// 0008233 // peptidase activity // inferred from electronic annotation /// 0008270 // zinc ion binding // inferred from electronic annotation	4.84034	5.1459	5.02113	8.35436	8.35147	8.28874	7.49187	8.05019	6.63091	8.33152	5.00246	7.39099
1424083_at	ROD1 regulator of differentiation 1 (S. pombe)	Rod1	547.842	55.1335	9.93665	0.00476976	Yes	No	0006397 // mRNA processing // inferred from electronic annotation	0005634 // nucleus // inferred from electronic annotation	0000166 // nucleotide binding // inferred from electronic annotation /// 0003676 // nucleic acid binding // inferred from electronic annotation /// 0003723 // RNA binding // inferred from electronic annotation	6.22329	5.65708	5.4742	8.93155	9.02156	9.33974	7.99687	7.69328	7.80117	9.09762	5.78486	7.83044
1450862_at	RAD54 like (S. cerevisiae)	Rad54l	443.758	45.6659	9.71749	0.00486386	Yes	No	0000724 // double-strand break repair via homologous recombination // inferred from genetic interaction /// 0006281 // DNA repair // inferred from electronic annotation /// 0006302 // double-strand break repair // inferred from genetic interaction /// 0006974 // response to DNA damage stimulus // inferred from mutant phenotype /// 0006974 // response to DNA damage stimulus // inferred from electr…	0005634 // nucleus // inferred from electronic annotation	0000166 // nucleotide binding // inferred from electronic annotation /// 0003676 // nucleic acid binding // inferred from electronic annotation /// 0003677 // DNA binding // inferred from electronic annotation /// 0004386 // helicase activity // inferred from electronic annotation /// 0005524 // ATP binding // inferred from electronic annotation /// 0016787 // hydrolase activity // inferred from …	5.5174	5.93526	5.08648	8.94497	8.79332	8.6426	8.71627	8.11996	8.02746	8.79363	5.51305	8.2879
1429658_a_at	structural maintenance of chromosomes 2	Smc2	360.873	37.515	9.61942	0.00476976	Yes	No	0007049 // cell cycle // inferred from electronic annotation /// 0007067 // mitosis // inferred from electronic annotation /// 0007076 // mitotic chromosome condensation // inferred from electronic annotation /// 0051276 // chromosome organization // inferred from electronic annotation /// 0051301 // cell division // inferred from electronic annotation	0000228 // nuclear chromosome // inferred from electronic annotation /// 0000796 // condensin complex // inferred from electronic annotation /// 0005634 // nucleus // inferred from electronic annotation /// 0005694 // chromosome // inferred from electronic annotation /// 0005737 // cytoplasm // inferred from electronic annotation	0000166 // nucleotide binding // inferred from electronic annotation /// 0005515 // protein binding // inferred from physical interaction /// 0005515 // protein binding // inferred from electronic annotation /// 0005524 // ATP binding // inferred from electronic annotation /// 0016887 // ATPase activity // inferred from electronic annotation /// 0046982 // protein heterodimerization activity // i…	5.25405	5.48394	4.9502	8.88524	8.20316	8.39764	9.04206	9.01685	8.48617	8.49535	5.2294	8.84836
1420897_at	synaptosomal-associated protein 23	Snap23	1089.38	114.528	9.51188	0.00430444	Yes	No	0006810 // transport // inferred from electronic annotation /// 0015031 // protein transport // inferred from electronic annotation	0005792 // microsome // inferred from direct assay /// 0005886 // plasma membrane // inferred from electronic annotation /// 0016020 // membrane // inferred from electronic annotation /// 0019717 // synaptosome // inferred from electronic annotation /// 0030054 // cell junction // inferred from electronic annotation /// 0045202 // synapse // inferred from electronic annotation	0005515 // protein binding // inferred from physical interaction /// 0005515 // protein binding // inferred from electronic annotation	7.02127	6.50517	6.99224	10.1628	9.89317	10.2119	8.66937	8.76614	7.66861	10.0893	6.83956	8.36804
1449207_a_at	kinesin family member 20A	Kif20a	199.459	21.4052	9.31828	0.00434304	Yes	No	0006810 // transport // inferred from electronic annotation /// 0007018 // microtubule-based movement // inferred from electronic annotation /// 0015031 // protein transport // inferred from electronic annotation	0005794 // Golgi apparatus // inferred from electronic annotation /// 0005874 // microtubule // inferred from electronic annotation /// 0005875 // microtubule associated complex // inferred from electronic annotation	0000166 // nucleotide binding // inferred from electronic annotation /// 0003774 // motor activity // inferred from electronic annotation /// 0003777 // microtubule motor activity // inferred from electronic annotation /// 0005524 // ATP binding // inferred from electronic annotation	4.31359	4.40844	4.53763	7.964	7.66958	7.28627	6.68972	6.3827	6.23903	7.63995	4.41989	6.43715
1421968_a_at	non imprinted in Prader-Willi/Angelman syndrome 2 homolog (human)	Nipa2	594.173	64.8757	9.15864	0.00366513	Yes	No	---	0016020 // membrane // inferred from electronic annotation /// 0016021 // integral to membrane // inferred from electronic annotation	0005515 // protein binding // inferred from physical interaction	6.08622	5.86278	6.10982	9.07273	9.41249	9.159	7.89869	7.30114	7.49276	9.21474	6.01961	7.5642
1426205_at	similar to protein phosphatase 1 /// protein phosphatase 1, catalytic subunit, b	LOC100044953 /// Ppp1cb	3336.45	366.171	9.11174	0.00468814	Yes	No	0005975 // carbohydrate metabolic process // inferred from electronic annotation /// 0005977 // glycogen metabolic process // inferred from electronic annotation /// 0006470 // protein amino acid dephosphorylation // inferred from direct assay /// 0007049 // cell cycle // inferred from electronic annotation /// 0051301 // cell division // inferred from electronic annotation	0005737 // cytoplasm // inferred from electronic annotation	0004721 // phosphoprotein phosphatase activity // inferred from electronic annotation /// 0004722 // protein serine/threonine phosphatase activity // inferred from direct assay /// 0005506 // iron ion binding // inferred from electronic annotation /// 0005515 // protein binding // inferred from physical interaction /// 0005515 // protein binding // inferred from electronic annotation /// 0016787 …	8.97181	8.31512	8.26219	11.7403	11.8124	11.5596	11.0521	11.0053	10.502	11.7041	8.51637	10.8531
1433428_x_at	transglutaminase 2, C polypeptide	Tgm2	228.878	25.259	9.06125	0.00430444	Yes	No	0001974 // blood vessel remodeling // inferred from electronic annotation /// 0006917 // induction of apoptosis // inferred from electronic annotation /// 0007186 // G-protein coupled receptor protein signaling pathway // traceable author statement /// 0007200 // G-protein signaling, coupled to IP3 second messenger (phospholipase C activating) // not recorded /// 0018149 // peptide cross-linking …	0005578 // proteinaceous extracellular matrix // traceable author statement /// 0005737 // cytoplasm // not recorded /// 0005739 // mitochondrion // inferred from electronic annotation /// 0005829 // cytosol // traceable author statement /// 0005886 // plasma membrane // inferred from electronic annotation /// 0016020 // membrane // traceable author statement	0003810 // protein-glutamine gamma-glutamyltransferase activity // inferred from mutant phenotype /// 0003810 // protein-glutamine gamma-glutamyltransferase activity // inferred from electronic annotation /// 0005509 // calcium ion binding // non-traceable author statement /// 0005509 // calcium ion binding // inferred from electronic annotation /// 0005525 // GTP binding // non-traceable author …	4.6204	4.60065	4.75513	7.50323	7.85145	8.16063	7.93879	7.18435	7.96684	7.83844	4.65873	7.69666
1433696_at	hematological and neurological expressed 1-like	Hn1l	248.965	27.5857	9.02514	0.00414948	Yes	No	---	0005634 // nucleus // inferred from electronic annotation /// 0005737 // cytoplasm // inferred from electronic annotation	---	4.50398	4.83793	5.01563	8.04086	7.87605	7.96248	6.43947	6.30888	6.43947	7.9598	4.78585	6.39594
1434951_at	armadillo repeat containing 8	Armc8	175.648	19.4904	9.01206	0.00470066	Yes	No	---	---	0005488 // binding // inferred from electronic annotation	4.14327	4.73887	3.97193	7.34069	7.44255	7.5864	6.84648	7.23589	6.54898	7.45655	4.28469	6.87712
1418203_at	phorbol-12-myristate-13-acetate-induced protein 1	Pmaip1	755.211	84.5483	8.93231	0.00446103	Yes	No	0001836 // release of cytochrome c from mitochondria // inferred from mutant phenotype /// 0001844 // protein insertion into mitochondrial membrane during induction of apoptosis // inferred from mutant phenotype /// 0006915 // apoptosis // not recorded /// 0006915 // apoptosis // inferred from electronic annotation /// 0006917 // induction of apoptosis // inferred from direct assay /// 0006974 //…	0005739 // mitochondrion // inferred from direct assay /// 0005739 // mitochondrion // inferred from electronic annotation /// 0005741 // mitochondrial outer membrane // not recorded	0005515 // protein binding // inferred from physical interaction	6.3547	6.37831	6.4721	9.51421	9.21843	9.94957	8.98453	9.38125	8.93583	9.56074	6.4017	9.10054
1428433_at	homeodomain interacting protein kinase 2	Hipk2	2536.52	285.78	8.87576	0.00366513	Yes	No	0000122 // negative regulation of transcription from RNA polymerase II promoter // inferred from direct assay /// 0006350 // transcription // inferred from electronic annotation /// 0006355 // regulation of transcription, DNA-dependent // inferred from electronic annotation /// 0006468 // protein amino acid phosphorylation // inferred from direct assay /// 0006468 // protein amino acid phosphoryl…	0005634 // nucleus // inferred from direct assay /// 0005634 // nucleus // inferred from electronic annotation /// 0005634 // nucleus // inferred from sequence or structural similarity /// 0005737 // cytoplasm // inferred from direct assay /// 0016605 // PML body // traceable author statement	0000166 // nucleotide binding // inferred from electronic annotation /// 0003677 // DNA binding // inferred from direct assay /// 0003677 // DNA binding // inferred from electronic annotation /// 0003714 // transcription corepressor activity // inferred from direct assay /// 0004672 // protein kinase activity // inferred from electronic annotation /// 0004672 // protein kinase activity // inferre…	8.10492	8.02851	8.34286	11.1637	11.3135	11.4487	10.4635	10.5718	10.1751	11.3086	8.15876	10.4035
1434503_s_at	lysosomal-associated membrane protein 2	Lamp2	3684.62	427.478	8.61944	0.00430444	Yes	No	---	0005624 // membrane fraction // not recorded /// 0005764 // lysosome // inferred from direct assay /// 0005764 // lysosome // not recorded /// 0005764 // lysosome // inferred from electronic annotation /// 0005765 // lysosomal membrane // not recorded /// 0005765 // lysosomal membrane // inferred from electronic annotation /// 0005768 // endosome // inferred from electronic annotation /// 0005770…	---	8.65099	8.47971	9.08842	11.7089	11.9665	11.8665	10.1557	9.8875	9.90981	11.8473	8.73971	9.98434
1433445_x_at	3-hydroxy-3-methylglutaryl-Coenzyme A synthase 1 /// similar to Hmgcs1 protein	Hmgcs1 /// LOC100040592	2120.17	246.135	8.61386	0.00470066	Yes	No	0006694 // steroid biosynthetic process // inferred from electronic annotation /// 0006695 // cholesterol biosynthetic process // inferred from electronic annotation /// 0008152 // metabolic process // inferred from electronic annotation /// 0008299 // isoprenoid biosynthetic process // inferred from electronic annotation /// 0008610 // lipid biosynthetic process // inferred from electronic annot…	0005737 // cytoplasm // inferred from electronic annotation	0003824 // catalytic activity // inferred from electronic annotation /// 0004421 // hydroxymethylglutaryl-CoA synthase activity // inferred from electronic annotation /// 0016740 // transferase activity // inferred from electronic annotation	8.0099	7.51722	8.3028	11.1409	11.0736	10.9354	10.0718	10.0718	9.0452	11.05	7.94331	9.7296
1430569_at	tetratricopeptide repeat domain 9C	Ttc9c	119.249	13.8561	8.60624	0.00492234	Yes	No	0006457 // protein folding // inferred from electronic annotation	---	0005488 // binding // inferred from electronic annotation	3.49325	3.81196	4.07215	7.25068	6.62801	6.81482	6.88026	7.25587	6.59996	6.89784	3.79245	6.91203
1450871_a_at	branched chain aminotransferase 1, cytosolic	Bcat1	303.996	35.8133	8.48836	0.00459075	Yes	No	0008152 // metabolic process // inferred from electronic annotation /// 0008652 // amino acid biosynthetic process // inferred from electronic annotation /// 0009081 // branched chain family amino acid metabolic process // inferred from electronic annotation /// 0009082 // branched chain family amino acid biosynthetic process // inferred from electronic annotation /// 0009083 // branched chain fa…	0005737 // cytoplasm // inferred from electronic annotation /// 0005829 // cytosol // inferred from direct assay	0003824 // catalytic activity // inferred from electronic annotation /// 0004084 // branched-chain-amino-acid transaminase activity // inferred from direct assay /// 0004084 // branched-chain-amino-acid transaminase activity // inferred from electronic annotation /// 0008483 // transaminase activity // inferred from electronic annotation /// 0016740 // transferase activity // inferred from electr…	5.00595	5.03258	5.44874	8.56659	8.03886	8.13828	6.76473	6.47652	6.62089	8.24791	5.16242	6.62071
1439943_at	vacuolar protein sorting 54 (yeast)	Vps54	688.303	81.6571	8.42919	0.00440516	Yes	No	0006810 // transport // inferred from electronic annotation /// 0015031 // protein transport // inferred from electronic annotation /// 0040007 // growth // inferred from mutant phenotype /// 0042147 // retrograde transport, endosome to Golgi // inferred from electronic annotation /// 0048873 // homeostasis of number of cells within a tissue // inferred from mutant phenotype /// 0050881 // muscul…	---	0005515 // protein binding // inferred from electronic annotation	6.03618	6.31198	6.70636	9.38697	9.51576	9.37797	7.82397	8.12291	7.85222	9.4269	6.35151	7.93303
1435575_at	kinetochore associated 1	Kntc1	320.606	38.0414	8.4278	0.00492234	Yes	No	0007049 // cell cycle // inferred from electronic annotation /// 0007067 // mitosis // inferred from electronic annotation /// 0007093 // mitotic cell cycle checkpoint // inferred from electronic annotation /// 0051301 // cell division // inferred from electronic annotation	0000777 // condensed chromosome kinetochore // inferred from electronic annotation /// 0000922 // spindle pole // inferred from electronic annotation /// 0005634 // nucleus // inferred from electronic annotation /// 0005737 // cytoplasm // inferred from electronic annotation /// 0005819 // spindle // inferred from electronic annotation /// 0005828 // kinetochore microtubule // inferred from elect…	0005515 // protein binding // inferred from electronic annotation	5.00796	5.15215	5.58839	8.60875	8.3544	8.01082	7.75963	7.48204	7.64194	8.32466	5.2495	7.62787
1436058_at	radical S-adenosyl methionine domain containing 2	Rsad2	626.534	74.6072	8.39777	0.00424039	Yes	No	0009615 // response to virus // inferred from electronic annotation /// 0051607 // defense response to virus // inferred from direct assay /// 0051607 // defense response to virus // inferred from electronic annotation	0005783 // endoplasmic reticulum // inferred from electronic annotation /// 0005783 // endoplasmic reticulum // inferred from sequence or structural similarity /// 0005789 // endoplasmic reticulum membrane // inferred from electronic annotation /// 0016020 // membrane // inferred from electronic annotation	0003824 // catalytic activity // inferred from electronic annotation /// 0005506 // iron ion binding // inferred from electronic annotation /// 0046872 // metal ion binding // inferred from electronic annotation /// 0051536 // iron-sulfur cluster binding // inferred from electronic annotation	6.44369	5.96793	6.25211	9.11085	9.3307	9.4322	9.13963	8.45294	8.28759	9.29125	6.22124	8.62672
1452534_a_at	high mobility group box 2	Hmgb2	2583.66	308.592	8.37241	0.00397645	Yes	No	0006288 // base-excision repair, DNA ligation // inferred from electronic annotation /// 0006288 // base-excision repair, DNA ligation // inferred from sequence or structural similarity /// 0006357 // regulation of transcription from RNA polymerase II promoter // inferred from electronic annotation /// 0006357 // regulation of transcription from RNA polymerase II promoter // inferred from sequenc…	0000793 // condensed chromosome // inferred from electronic annotation /// 0000793 // condensed chromosome // inferred from sequence or structural similarity /// 0005634 // nucleus // inferred from electronic annotation /// 0005634 // nucleus // inferred from sequence or structural similarity /// 0005694 // chromosome // inferred from electronic annotation /// 0005737 // cytoplasm // inferred fro…	0003677 // DNA binding // inferred from electronic annotation /// 0008301 // DNA bending activity // inferred from electronic annotation /// 0008301 // DNA bending activity // inferred from sequence or structural similarity	8.47181	8.22123	8.11563	11.5148	11.282	11.2088	9.61631	9.36517	9.43221	11.3352	8.26956	9.47123
1420731_a_at	cysteine and glycine-rich protein 2	Csrp2	429.68	51.9769	8.26675	0.00434304	Yes	No	0007275 // multicellular organismal development // inferred from electronic annotation /// 0030154 // cell differentiation // inferred from electronic annotation /// 0045445 // myoblast differentiation // inferred from electronic annotation	0005634 // nucleus // inferred from electronic annotation	0008270 // zinc ion binding // inferred from electronic annotation /// 0046872 // metal ion binding // inferred from electronic annotation	5.61711	5.45665	6.02564	8.93606	8.61183	8.69347	6.73908	6.66053	6.30886	8.74712	5.6998	6.56949
1450677_at	checkpoint kinase 1 homolog (S. pombe)	Chek1	195.515	23.7854	8.21995	0.00430444	Yes	No	0000077 // DNA damage checkpoint // inferred from direct assay /// 0000077 // DNA damage checkpoint // inferred from mutant phenotype /// 0000086 // G2/M transition of mitotic cell cycle // inferred from mutant phenotype /// 0006281 // DNA repair // inferred from direct assay /// 0006281 // DNA repair // inferred from electronic annotation /// 0006468 // protein amino acid phosphorylation // infe…	0005634 // nucleus // inferred from direct assay /// 0005634 // nucleus // inferred from electronic annotation /// 0005654 // nucleoplasm // not recorded /// 0005657 // replication fork // inferred from direct assay /// 0005737 // cytoplasm // inferred from electronic annotation	0000166 // nucleotide binding // inferred from electronic annotation /// 0004672 // protein kinase activity // inferred from mutant phenotype /// 0004672 // protein kinase activity // inferred from electronic annotation /// 0004674 // protein serine/threonine kinase activity // inferred from electronic annotation /// 0005515 // protein binding // inferred from physical interaction /// 0005515 // …	4.88155	4.28268	4.55178	7.70924	7.56581	7.55835	6.76222	6.31511	6.40994	7.61113	4.572	6.49576
1429095_at	centromere protein P	Cenpp	203.938	24.8665	8.2013	0.00417426	Yes	No	---	0000775 // chromosome, centromeric region // inferred from electronic annotation /// 0005634 // nucleus // inferred from electronic annotation /// 0005694 // chromosome // inferred from electronic annotation	---	4.71156	4.68123	4.5156	7.82693	7.80475	7.38427	7.19424	6.74158	6.76944	7.67198	4.63613	6.90175
1452040_a_at	cell division cycle associated 3	Cdca3	318.811	39.1596	8.14132	0.0046807	Yes	No	0006511 // ubiquitin-dependent protein catabolic process // inferred from electronic annotation /// 0007049 // cell cycle // inferred from electronic annotation /// 0007067 // mitosis // inferred from electronic annotation /// 0051301 // cell division // inferred from electronic annotation	0005737 // cytoplasm // inferred from electronic annotation	---	5.37706	5.2112	5.28562	8.46665	8.60342	7.8796	7.49987	6.78935	7.32137	8.31656	5.29129	7.20353
1435597_at	ATPase family, AAA domain containing 5	Atad5	546.953	67.4497	8.10905	0.00486386	Yes	No	0006974 // response to DNA damage stimulus // inferred from electronic annotation	0005634 // nucleus // inferred from electronic annotation	0000166 // nucleotide binding // inferred from electronic annotation /// 0005524 // ATP binding // inferred from electronic annotation /// 0017111 // nucleoside-triphosphatase activity // inferred from electronic annotation	6.46585	5.66437	6.097	9.08459	9.20406	8.99717	8.81401	8.16532	8.35295	9.09527	6.07574	8.44409
1452007_at	vesicle-associated membrane protein 7	Vamp7	228.351	28.4311	8.03173	0.00430444	Yes	No	0006810 // transport // inferred from electronic annotation /// 0006887 // exocytosis // inferred from electronic annotation /// 0006888 // ER to Golgi vesicle-mediated transport // inferred from sequence or structural similarity /// 0006906 // vesicle fusion // inferred from sequence or structural similarity /// 0006911 // phagocytosis, engulfment // inferred from sequence or structural similari…	0005764 // lysosome // inferred from electronic annotation /// 0005765 // lysosomal membrane // inferred from sequence or structural similarity /// 0005765 // lysosomal membrane // inferred from electronic annotation /// 0005768 // endosome // inferred from electronic annotation /// 0005783 // endoplasmic reticulum // inferred from electronic annotation /// 0005789 // endoplasmic reticulum membra…	0005515 // protein binding // inferred from sequence or structural similarity	5.05369	4.64436	4.79014	7.71272	7.69441	8.09819	6.03738	5.94189	5.94237	7.83511	4.8294	5.97388
1421317_x_at	myeloblastosis oncogene	Myb	2594.61	323.578	8.01849	0.00470066	Yes	No	0000082 // G1/S transition of mitotic cell cycle // inferred from mutant phenotype /// 0001701 // in utero embryonic development // inferred from mutant phenotype /// 0006350 // transcription // inferred from electronic annotation /// 0006355 // regulation of transcription, DNA-dependent // inferred from direct assay /// 0006355 // regulation of transcription, DNA-dependent // inferred from mutan…	0005634 // nucleus // inferred from direct assay /// 0005634 // nucleus // inferred from electronic annotation	0003677 // DNA binding // inferred from direct assay /// 0003677 // DNA binding // inferred from electronic annotation /// 0003700 // transcription factor activity // inferred from direct assay /// 0003700 // transcription factor activity // inferred from mutant phenotype /// 0005515 // protein binding // inferred from physical interaction /// 0030528 // transcription regulator activity // inferr…	8.12226	8.44797	8.44368	11.6808	10.9838	11.3593	10.9485	10.8329	10.4196	11.3413	8.33797	10.7337
1433444_at	3-hydroxy-3-methylglutaryl-Coenzyme A synthase 1 /// similar to Hmgcs1 protein	Hmgcs1 /// LOC100040592	1801.11	224.948	8.00675	0.00492234	Yes	No	0006694 // steroid biosynthetic process // inferred from electronic annotation /// 0006695 // cholesterol biosynthetic process // inferred from electronic annotation /// 0008152 // metabolic process // inferred from electronic annotation /// 0008299 // isoprenoid biosynthetic process // inferred from electronic annotation /// 0008610 // lipid biosynthetic process // inferred from electronic annot…	0005737 // cytoplasm // inferred from electronic annotation	0003824 // catalytic activity // inferred from electronic annotation /// 0004421 // hydroxymethylglutaryl-CoA synthase activity // inferred from electronic annotation /// 0016740 // transferase activity // inferred from electronic annotation	8.07844	7.35243	8.00948	10.9199	10.8431	10.681	9.74361	9.73981	8.64176	10.8147	7.81345	9.37506
1423971_at	THO complex 3	Thoc3	452.951	56.7004	7.98849	0.00476976	Yes	No	0006397 // mRNA processing // inferred from electronic annotation /// 0006810 // transport // inferred from electronic annotation /// 0008380 // RNA splicing // inferred from electronic annotation /// 0051028 // mRNA transport // inferred from electronic annotation	0005634 // nucleus // inferred from electronic annotation	0003723 // RNA binding // inferred from electronic annotation	5.63734	5.58066	6.25786	8.94916	8.85496	8.66551	8.99164	8.59852	8.15968	8.82321	5.82529	8.58328
1417190_at	nicotinamide phosphoribosyltransferase	Nampt	932.519	116.737	7.98818	0.00430444	Yes	No	0009435 // NAD biosynthetic process // inferred from direct assay /// 0019363 // pyridine nucleotide biosynthetic process // inferred from electronic annotation	0005737 // cytoplasm // inferred from direct assay /// 0005737 // cytoplasm // inferred from electronic annotation	0016740 // transferase activity // inferred from electronic annotation /// 0016757 // transferase activity, transferring glycosyl groups // inferred from electronic annotation /// 0047280 // nicotinamide phosphoribosyltransferase activity // inferred from direct assay /// 0047280 // nicotinamide phosphoribosyltransferase activity // inferred from electronic annotation	7.16681	6.63318	6.80138	9.73082	9.81345	10.0507	9.1693	8.71724	8.60308	9.86499	6.86712	8.82987
1450646_at	cytochrome P450, family 51	Cyp51	832.335	105.228	7.90979	0.00430444	Yes	No	0006695 // cholesterol biosynthetic process // traceable author statement	---	0004497 // monooxygenase activity // inferred from electronic annotation /// 0005506 // iron ion binding // inferred from electronic annotation /// 0008168 // methyltransferase activity // inferred from electronic annotation /// 0008398 // sterol 14-demethylase activity // traceable author statement /// 0009055 // electron carrier activity // inferred from electronic annotation /// 0020037 // hem…	6.99983	6.53361	6.6187	9.82807	9.51405	9.76094	8.96875	9.1221	7.99203	9.70102	6.71738	8.69429
1452608_at	c-myc binding protein	Mycbp	457.201	58.0404	7.87728	0.0046807	Yes	No	0006350 // transcription // inferred from electronic annotation /// 0006355 // regulation of transcription, DNA-dependent // inferred from electronic annotation /// 0007283 // spermatogenesis // inferred from electronic annotation /// 0045449 // regulation of transcription // inferred from sequence or structural similarity	0005634 // nucleus // inferred from electronic annotation /// 0005634 // nucleus // inferred from sequence or structural similarity /// 0005737 // cytoplasm // not recorded /// 0005737 // cytoplasm // inferred from electronic annotation	0003713 // transcription coactivator activity // inferred from electronic annotation /// 0003713 // transcription coactivator activity // inferred from sequence or structural similarity /// 0005515 // protein binding // not recorded /// 0005515 // protein binding // inferred from electronic annotation	5.88322	5.53297	6.16077	9.09753	8.72234	8.69018	7.85516	7.56288	7.04152	8.83668	5.85899	7.48652
1417696_at	sterol O-acyltransferase 1	Soat1	460.87	60.2358	7.6511	0.00430444	Yes	No	0006629 // lipid metabolic process // inferred from electronic annotation /// 0008202 // steroid metabolic process // inferred from electronic annotation /// 0008203 // cholesterol metabolic process // inferred from direct assay /// 0008203 // cholesterol metabolic process // not recorded /// 0008203 // cholesterol metabolic process // inferred from electronic annotation	0005783 // endoplasmic reticulum // inferred from electronic annotation /// 0005789 // endoplasmic reticulum membrane // inferred from electronic annotation /// 0005792 // microsome // inferred from direct assay /// 0016020 // membrane // not recorded /// 0016020 // membrane // inferred from electronic annotation /// 0016021 // integral to membrane // inferred from electronic annotation	0004772 // sterol O-acyltransferase activity // inferred from direct assay /// 0004772 // sterol O-acyltransferase activity // not recorded /// 0004772 // sterol O-acyltransferase activity // inferred from electronic annotation /// 0008415 // acyltransferase activity // inferred from electronic annotation /// 0016740 // transferase activity // inferred from electronic annotation /// 0034736 // ch…	6.18135	5.71648	5.83982	8.99454	8.67152	8.87859	7.94375	7.69591	7.28761	8.84822	5.91255	7.64242
1434278_at	X-linked myotubular myopathy gene 1	Mtm1	469.109	61.5548	7.621	0.00476976	Yes	No	0016311 // dephosphorylation // inferred from electronic annotation /// 0046716 // muscle maintenance // inferred from mutant phenotype	---	0004721 // phosphoprotein phosphatase activity // inferred from electronic annotation /// 0004725 // protein tyrosine phosphatase activity // inferred from electronic annotation /// 0016787 // hydrolase activity // inferred from electronic annotation /// 0016791 // phosphatase activity // inferred from electronic annotation	6.08379	5.61303	6.13458	9.18424	8.72276	8.71434	7.86543	7.69376	8.13623	8.87378	5.9438	7.89847
1425521_at	polyadenylate binding protein-interacting protein 1	Paip1	354.782	48.8372	7.26458	0.00366513	Yes	No	0006417 // regulation of translation // inferred from electronic annotation /// 0016070 // RNA metabolic process // inferred from electronic annotation	0005737 // cytoplasm // inferred from electronic annotation	0005488 // binding // inferred from electronic annotation /// 0005515 // protein binding // inferred from electronic annotation	5.78118	5.63648	5.41207	8.38803	8.52172	8.50262	7.48343	7.55639	7.13126	8.47079	5.60991	7.39036
1417400_at	retinoic acid induced 14	Rai14	252.338	35.0742	7.19441	0.00430444	Yes	No	---	0005737 // cytoplasm // inferred from electronic annotation /// 0005739 // mitochondrion // inferred from direct assay /// 0005856 // cytoskeleton // inferred from electronic annotation	0005515 // protein binding // inferred from electronic annotation	5.31305	4.94946	5.1345	7.99438	7.76395	8.17931	7.07353	6.59107	6.28825	7.97921	5.13234	6.65095
1435975_at	DENN/MADD domain containing 4A	Dennd4a	716.719	99.6992	7.18881	0.00459075	Yes	No	0006508 // proteolysis // inferred from electronic annotation	---	0004197 // cysteine-type endopeptidase activity // inferred from electronic annotation	6.52134	6.7603	6.63689	9.3183	9.86612	9.27137	8.83288	8.83288	8.7651	9.48526	6.63951	8.81029
1416529_at	epithelial membrane protein 1	Emp1	973.713	136.022	7.15851	0.00397645	Yes	No	0016049 // cell growth // inferred from electronic annotation	0016020 // membrane // inferred from electronic annotation /// 0016021 // integral to membrane // inferred from electronic annotation	---	7.24334	7.00684	7.0129	9.73128	9.95928	10.0915	7.90645	7.90645	7.25573	9.92735	7.08769	7.68954
1423774_a_at	protein regulator of cytokinesis 1	Prc1	271.601	38.2455	7.10153	0.00430444	Yes	No	0000910 // cytokinesis // not recorded /// 0007049 // cell cycle // inferred from electronic annotation /// 0051301 // cell division // inferred from electronic annotation	0005634 // nucleus // inferred from electronic annotation /// 0005737 // cytoplasm // inferred from electronic annotation /// 0005819 // spindle // not recorded /// 0005874 // microtubule // inferred from electronic annotation	0005515 // protein binding // inferred from electronic annotation	5.27006	5.10455	5.39704	8.07692	8.3495	7.82962	7.42451	6.95799	7.18202	8.08535	5.25722	7.18817
1436456_at	solute carrier family 38, member 9	Slc38a9	422.893	59.9342	7.05596	0.00430444	Yes	No	0006810 // transport // inferred from electronic annotation /// 0006811 // ion transport // inferred from electronic annotation /// 0006814 // sodium ion transport // inferred from electronic annotation /// 0006865 // amino acid transport // inferred from electronic annotation	0016020 // membrane // inferred from electronic annotation /// 0016021 // integral to membrane // inferred from electronic annotation	0031402 // sodium ion binding // inferred from electronic annotation	5.86892	5.68836	6.15864	8.52626	8.90875	8.73744	8.43729	8.56066	8.25228	8.72415	5.90531	8.41674
1428487_s_at	coenzyme Q10 homolog B (S. cerevisiae)	Coq10b	444.361	63.212	7.0297	0.00424471	Yes	No	---	0005739 // mitochondrion // inferred from electronic annotation	---	5.98468	5.82311	6.13859	8.58995	8.77561	9.02121	6.78802	6.78828	6.56698	8.79559	5.98213	6.71443
1457070_at	---	---	174.085	25.0085	6.96103	0.00417426	Yes	No	---	---	---	4.36035	4.7575	4.81519	7.47974	7.41515	7.43605	6.2025	6.2025	5.86971	7.44365	4.64435	6.09157
1425537_at	protein phosphatase 1A, magnesium dependent, alpha isoform	Ppm1a	229.111	33.4484	6.84968	0.00430444	Yes	No	0006470 // protein amino acid dephosphorylation // inferred from direct assay /// 0006470 // protein amino acid dephosphorylation // inferred from electronic annotation /// 0043123 // positive regulation of I-kappaB kinase/NF-kappaB cascade // inferred from electronic annotation	0005624 // membrane fraction // inferred from electronic annotation /// 0005891 // voltage-gated calcium channel complex // inferred from electronic annotation /// 0008287 // protein serine/threonine phosphatase complex // inferred from electronic annotation /// 0043005 // neuron projection // inferred from electronic annotation	0000287 // magnesium ion binding // inferred from electronic annotation /// 0003824 // catalytic activity // inferred from electronic annotation /// 0004721 // phosphoprotein phosphatase activity // inferred from direct assay /// 0004721 // phosphoprotein phosphatase activity // inferred from electronic annotation /// 0004722 // protein serine/threonine phosphatase activity // inferred from elect…	5.12486	4.77391	5.29283	7.79079	7.91242	7.8165	7.3705	7.12793	7.22443	7.8399	5.06387	7.24095
1443602_at	---	---	2522.9	368.374	6.84875	0.00476976	Yes	No	---	---	---	8.42125	8.40656	8.74727	11.4241	10.938	11.5405	11.3307	11.9256	11.1993	11.3009	8.52503	11.4852
1450724_at	family with sequence similarity 126, member A	Fam126a	1053.79	154.58	6.81708	0.00459075	Yes	No	---	0005737 // cytoplasm // not recorded /// 0005737 // cytoplasm // inferred from electronic annotation /// 0016020 // membrane // inferred from electronic annotation	---	7.31254	6.91268	7.59142	10.0196	10.0718	10.0327	9.10518	8.86332	9.08045	10.0414	7.27221	9.01632
1440866_at	eukaryotic translation initiation factor 2-alpha kinase 2	Eif2ak2	91.775	13.5099	6.79315	0.00278337	Yes	No	0006412 // translation // inferred from direct assay /// 0006468 // protein amino acid phosphorylation // inferred from direct assay /// 0006468 // protein amino acid phosphorylation // inferred from electronic annotation /// 0006926 // virus-infected cell apoptosis // inferred from direct assay /// 0009615 // response to virus // inferred from electronic annotation /// 0030968 // endoplasmic ret…	0005622 // intracellular // inferred from electronic annotation	0000166 // nucleotide binding // inferred from electronic annotation /// 0003723 // RNA binding // inferred from electronic annotation /// 0003725 // double-stranded RNA binding // inferred from electronic annotation /// 0003743 // translation initiation factor activity // inferred from electronic annotation /// 0004672 // protein kinase activity // inferred from direct assay /// 0004672 // prote…	3.71925	3.8874	3.6612	6.62549	6.48652	6.44808	4.83535	4.08584	4.0923	6.52003	3.75595	4.33783
1438852_x_at	minichromosome maintenance deficient 6 (MIS5 homolog, S. pombe) (S. cerevisiae)	Mcm6	1944.88	289.602	6.71569	0.00476976	Yes	No	0006260 // DNA replication // inferred from electronic annotation /// 0006268 // DNA unwinding during replication // inferred from physical interaction /// 0006270 // DNA replication initiation // inferred from electronic annotation /// 0006350 // transcription // inferred from electronic annotation /// 0006355 // regulation of transcription, DNA-dependent // inferred from electronic annotation /…	0005634 // nucleus // inferred from direct assay /// 0005634 // nucleus // inferred from electronic annotation	0000166 // nucleotide binding // inferred from electronic annotation /// 0003677 // DNA binding // inferred from electronic annotation /// 0003678 // DNA helicase activity // inferred from physical interaction /// 0003697 // single-stranded DNA binding // inferred from physical interaction /// 0005515 // protein binding // inferred from physical interaction /// 0005524 // ATP binding // inferred …	8.57867	8.03955	7.91557	11.0099	10.9606	10.8059	10.6054	10.4036	10.5952	10.9255	8.17793	10.5347
1448191_at	polo-like kinase 1 (Drosophila)	Plk1	374.979	56.3082	6.65941	0.00440516	Yes	No	0006468 // protein amino acid phosphorylation // inferred from electronic annotation /// 0007049 // cell cycle // inferred from electronic annotation /// 0007067 // mitosis // inferred from electronic annotation /// 0051301 // cell division // inferred from electronic annotation	0005634 // nucleus // inferred from electronic annotation /// 0005737 // cytoplasm // inferred from electronic annotation /// 0005856 // cytoskeleton // inferred from electronic annotation	0000166 // nucleotide binding // inferred from electronic annotation /// 0004672 // protein kinase activity // inferred from electronic annotation /// 0004674 // protein serine/threonine kinase activity // inferred from electronic annotation /// 0005515 // protein binding // inferred from electronic annotation /// 0005524 // ATP binding // inferred from electronic annotation /// 0016301 // kinase…	5.80678	5.70392	5.93512	8.63148	8.79677	8.22375	8.22694	7.98328	7.84712	8.55067	5.81527	8.01911
1437743_at	AE binding protein 2	Aebp2	1050.9	157.844	6.65784	0.00424039	Yes	No	0006350 // transcription // inferred from electronic annotation /// 0006355 // regulation of transcription, DNA-dependent // inferred from direct assay /// 0006355 // regulation of transcription, DNA-dependent // inferred from electronic annotation /// 0016568 // chromatin modification // inferred from electronic annotation	0005622 // intracellular // inferred from electronic annotation /// 0005634 // nucleus // inferred from direct assay /// 0005634 // nucleus // inferred from electronic annotation	0003677 // DNA binding // inferred from direct assay /// 0003677 // DNA binding // inferred from electronic annotation /// 0003714 // transcription corepressor activity // inferred from direct assay /// 0003714 // transcription corepressor activity // inferred from mutant phenotype /// 0008270 // zinc ion binding // inferred from electronic annotation /// 0046872 // metal ion binding // inferred …	7.41411	7.05369	7.43928	9.96341	9.96113	10.1877	9.70794	9.59305	8.93822	10.0374	7.30236	9.41307
1434294_at	---	---	242.748	36.647	6.62394	0.00459075	Yes	No	---	---	---	5.53136	4.89076	5.16475	7.82538	7.9983	7.94626	7.92388	8.08751	7.06329	7.92331	5.19562	7.69156
1423463_a_at	DNA segment, Chr 2, ERATO Doi 750, expressed	D2Ertd750e	84.6726	12.8089	6.61043	0.00430444	Yes	No	---	0005634 // nucleus // inferred from electronic annotation	0005515 // protein binding // inferred from physical interaction /// 0005515 // protein binding // inferred from electronic annotation	3.70912	3.81433	3.51379	6.60503	6.46996	6.13648	5.18729	4.64497	4.32376	6.40382	3.67908	4.71867
1448061_at	macrophage scavenger receptor 1	Msr1	121.143	18.3597	6.59831	0.00424039	Yes	No	0006897 // endocytosis // inferred from electronic annotation /// 0006898 // receptor-mediated endocytosis // inferred from electronic annotation /// 0042953 // lipoprotein transport // inferred from mutant phenotype	0016020 // membrane // inferred from electronic annotation /// 0016021 // integral to membrane // inferred from electronic annotation	0004872 // receptor activity // inferred from electronic annotation /// 0005044 // scavenger receptor activity // inferred from electronic annotation /// 0005319 // lipid transporter activity // inferred from electronic annotation /// 0005515 // protein binding // inferred from physical interaction	4.3001	4.19962	4.09568	6.64915	7.05166	7.06088	4.70587	4.74649	4.50576	6.92056	4.19847	4.65271
1419552_at	enoyl Coenzyme A hydratase domain containing 1	Echdc1	288.787	43.9033	6.57779	0.00320227	Yes	No	0008152 // metabolic process // inferred from electronic annotation	---	0003824 // catalytic activity // inferred from electronic annotation	5.34415	5.56141	5.46321	8.12827	8.32106	8.07225	7.68856	7.61877	7.03324	8.17386	5.45626	7.44686
1435679_at	optineurin	Optn	198.115	30.2812	6.54252	0.00459075	Yes	No	0000042 // protein targeting to Golgi // inferred from electronic annotation /// 0007030 // Golgi organization // inferred from electronic annotation /// 0043001 // Golgi to plasma membrane protein transport // inferred from electronic annotation	0005737 // cytoplasm // inferred from electronic annotation /// 0005794 // Golgi apparatus // inferred from electronic annotation	0008022 // protein C-terminus binding // inferred from electronic annotation	5.26256	4.62858	4.86991	7.66339	7.55632	7.67088	6.32539	6.18019	6.07912	7.6302	4.92035	6.1949
1428281_at	TruB pseudouridine (psi) synthase homolog 1 (E. coli)	Trub1	388.85	59.5672	6.52792	0.00436116	Yes	No	0001522 // pseudouridine synthesis // inferred from electronic annotation /// 0008033 // tRNA processing // inferred from electronic annotation /// 0031119 // tRNA pseudouridine synthesis // inferred from electronic annotation	---	0009982 // pseudouridine synthase activity // inferred from electronic annotation /// 0016853 // isomerase activity // inferred from electronic annotation	6.08729	5.55775	6.0443	8.59627	8.53844	8.6745	7.26714	7.1991	7.04056	8.60307	5.89645	7.16893
1453024_at	WD repeat domain 37	Wdr37	278.768	42.742	6.52212	0.00434304	Yes	No	---	---	---	5.62638	5.16156	5.46481	8.01911	8.01064	8.33902	6.89646	6.98844	6.02504	8.12292	5.41758	6.63665
1433739_at	nucleolar protein 10	Nol10	105.601	16.2031	6.51733	0.00424039	Yes	No	---	0005634 // nucleus // inferred from electronic annotation	---	4.21481	4.05265	3.78714	6.80769	6.79446	6.56529	6.09575	5.94436	5.9287	6.72248	4.0182	5.9896
1427940_s_at	c-myc binding protein	Mycbp	114.661	17.7411	6.46298	0.00440516	Yes	No	0006350 // transcription // inferred from electronic annotation /// 0006355 // regulation of transcription, DNA-dependent // inferred from electronic annotation /// 0007283 // spermatogenesis // inferred from electronic annotation /// 0045449 // regulation of transcription // inferred from sequence or structural similarity	0005634 // nucleus // inferred from electronic annotation /// 0005634 // nucleus // inferred from sequence or structural similarity /// 0005737 // cytoplasm // not recorded /// 0005737 // cytoplasm // inferred from electronic annotation	0003713 // transcription coactivator activity // inferred from electronic annotation /// 0003713 // transcription coactivator activity // inferred from sequence or structural similarity /// 0005515 // protein binding // not recorded /// 0005515 // protein binding // inferred from electronic annotation	4.02083	4.02747	4.39878	6.9539	6.59011	6.97967	5.42942	5.34348	5.17122	6.84123	4.14903	5.31471
1437495_at	similar to zinc finger, X-linked, duplicated B /// membrane-bound transcription	LOC100047187 /// Mbtps2 /// Yy2	331.204	51.4002	6.44363	0.00492234	Yes	No	0006350 // transcription // inferred from electronic annotation /// 0006355 // regulation of transcription, DNA-dependent // inferred from electronic annotation /// 0006508 // proteolysis // inferred from electronic annotation /// 0006629 // lipid metabolic process // inferred from electronic annotation /// 0008202 // steroid metabolic process // inferred from electronic annotation /// 0008203 //…	0005622 // intracellular // inferred from electronic annotation /// 0005634 // nucleus // inferred from electronic annotation /// 0016020 // membrane // inferred from electronic annotation /// 0016021 // integral to membrane // inferred from electronic annotation	0003676 // nucleic acid binding // inferred from electronic annotation /// 0003677 // DNA binding // inferred from electronic annotation /// 0004222 // metalloendopeptidase activity // inferred from electronic annotation /// 0008233 // peptidase activity // inferred from electronic annotation /// 0008237 // metallopeptidase activity // inferred from electronic annotation /// 0008270 // zinc ion b…	5.88856	5.7937	5.36885	8.08646	8.58032	8.44795	7.7979	7.57137	7.62319	8.37158	5.6837	7.66415
1448710_at	chemokine (C-X-C motif) receptor 4	Cxcr4	1489.83	234.735	6.34686	0.00446103	Yes	No	0001569 // patterning of blood vessels // inferred from mutant phenotype /// 0001666 // response to hypoxia // inferred from electronic annotation /// 0001667 // ameboidal cell migration // inferred from mutant phenotype /// 0001764 // neuron migration // inferred from direct assay /// 0007165 // signal transduction // inferred from electronic annotation /// 0007186 // G-protein coupled receptor …	0005886 // plasma membrane // inferred from electronic annotation /// 0016020 // membrane // inferred from electronic annotation /// 0016021 // integral to membrane // inferred from electronic annotation /// 0030426 // growth cone // inferred from direct assay /// 0031252 // cell leading edge // inferred from electronic annotation	0003779 // actin binding // inferred from electronic annotation /// 0004871 // signal transducer activity // inferred from electronic annotation /// 0004872 // receptor activity // inferred from electronic annotation /// 0004930 // G-protein coupled receptor activity // inferred from electronic annotation /// 0005515 // protein binding // inferred from electronic annotation /// 0016493 // C-C che…	7.75406	7.85023	8.02038	10.3317	10.4285	10.8626	10.6561	10.9547	10.6678	10.5409	7.87489	10.7595
1424711_at	transmembrane protein 2	Tmem2	97.601	15.4751	6.30698	0.00492234	Yes	No	---	0016020 // membrane // inferred from electronic annotation /// 0016021 // integral to membrane // inferred from electronic annotation	---	4.16406	3.62702	4.06454	6.542	6.86965	6.41482	5.71767	5.71767	4.83805	6.60882	3.95187	5.42446
1428336_at	1-acylglycerol-3-phosphate O-acyltransferase 4 (lysophosphatidic acid acyltransf	Agpat4	608.011	96.7961	6.28136	0.00434304	Yes	No	0008152 // metabolic process // inferred from electronic annotation /// 0008654 // phospholipid biosynthetic process // inferred from electronic annotation	0016020 // membrane // inferred from electronic annotation /// 0016021 // integral to membrane // inferred from electronic annotation	0003841 // 1-acylglycerol-3-phosphate O-acyltransferase activity // inferred from electronic annotation /// 0008415 // acyltransferase activity // inferred from electronic annotation /// 0016740 // transferase activity // inferred from electronic annotation	6.4327	6.73448	6.62345	9.43144	8.96266	9.34976	7.46229	7.42469	7.19533	9.24795	6.59688	7.36077
1442350_at	---	---	134.011	21.7491	6.16166	0.00476976	Yes	No	---	---	---	4.43576	4.19283	4.70007	6.97338	7.3463	6.87894	5.84452	5.6515	5.57709	7.06621	4.44289	5.69104
1449095_at	vacuolar protein sorting 54 (yeast)	Vps54	3734.93	609.438	6.12848	0.00397645	Yes	No	0006810 // transport // inferred from electronic annotation /// 0015031 // protein transport // inferred from electronic annotation /// 0040007 // growth // inferred from mutant phenotype /// 0042147 // retrograde transport, endosome to Golgi // inferred from electronic annotation /// 0048873 // homeostasis of number of cells within a tissue // inferred from mutant phenotype /// 0050881 // muscul…	---	0005515 // protein binding // inferred from electronic annotation	9.455	9.24214	9.05687	11.8319	11.8697	11.899	11.3722	11.2584	10.895	11.8669	9.25134	11.1752
1455990_at	kinesin family member 23	Kif23	562.044	91.7371	6.12668	0.00476976	Yes	No	0007018 // microtubule-based movement // inferred from electronic annotation	0005875 // microtubule associated complex // inferred from electronic annotation	0000166 // nucleotide binding // inferred from electronic annotation /// 0003777 // microtubule motor activity // inferred from electronic annotation /// 0005515 // protein binding // inferred from electronic annotation /// 0005524 // ATP binding // inferred from electronic annotation	6.69458	6.45853	6.40519	9.49705	9.00103	8.90554	8.84262	8.68388	8.57965	9.13454	6.51943	8.70205
1447217_at	ubiquitin-like, containing PHD and RING finger domains 2	Uhrf2	452.303	74.116	6.10264	0.00430444	Yes	No	0006464 // protein modification process // inferred from electronic annotation /// 0006511 // ubiquitin-dependent protein catabolic process // inferred from sequence or structural similarity /// 0006511 // ubiquitin-dependent protein catabolic process // inferred from electronic annotation /// 0007049 // cell cycle // inferred from electronic annotation /// 0008283 // cell proliferation // inferr…	0005634 // nucleus // inferred from sequence or structural similarity /// 0005634 // nucleus // inferred from electronic annotation	0003677 // DNA binding // inferred from electronic annotation /// 0004842 // ubiquitin-protein ligase activity // inferred from sequence or structural similarity /// 0004842 // ubiquitin-protein ligase activity // inferred from electronic annotation /// 0005515 // protein binding // inferred from sequence or structural similarity /// 0005515 // protein binding // inferred from electronic annotati…	6.14184	6.03452	6.45878	8.82994	8.9761	8.6574	6.88089	8.03086	7.67271	8.82115	6.21171	7.52815
1416035_at	hypoxia inducible factor 1, alpha subunit	Hif1a	1903.05	314.973	6.04196	0.00440516	Yes	No	0000160 // two-component signal transduction system (phosphorelay) // inferred from electronic annotation /// 0001525 // angiogenesis // inferred from mutant phenotype /// 0001666 // response to hypoxia // inferred from direct assay /// 0001666 // response to hypoxia // not recorded /// 0001666 // response to hypoxia // inferred from electronic annotation /// 0001666 // response to hypoxia // inf…	0005634 // nucleus // inferred from direct assay /// 0005634 // nucleus // inferred from electronic annotation /// 0005634 // nucleus // inferred from sequence or structural similarity /// 0005667 // transcription factor complex // not recorded /// 0005667 // transcription factor complex // inferred from electronic annotation /// 0005737 // cytoplasm // inferred from electronic annotation /// 000…	0000155 // two-component sensor activity // inferred from electronic annotation /// 0003677 // DNA binding // inferred from direct assay /// 0003677 // DNA binding // inferred from genetic interaction /// 0003677 // DNA binding // inferred from electronic annotation /// 0003700 // transcription factor activity // inferred from direct assay /// 0003700 // transcription factor activity // not recor…	8.54971	8.06745	8.28009	10.8928	10.7308	11.0587	9.89783	9.70395	9.83952	10.8941	8.29908	9.81377
1452352_at	cytotoxic T lymphocyte-associated protein 2 beta	Ctla2b	97.9337	16.2214	6.03731	0.00430444	Yes	No	---	---	0004869 // cysteine protease inhibitor activity // traceable author statement /// 0005515 // protein binding // inferred from physical interaction /// 0008234 // cysteine-type peptidase activity // inferred from electronic annotation	3.92603	3.8874	4.24605	6.82401	6.41635	6.60084	4.73957	3.9818	4.35413	6.61373	4.01983	4.3585
1448721_at	DNA segment, Chr 1, ERATO Doi 622, expressed	D1Ertd622e	380.021	63.0192	6.03025	0.00417426	Yes	No	---	---	---	6.12706	6.00927	5.79683	8.46427	8.48914	8.7564	7.89639	7.62799	7.23589	8.56994	5.97772	7.58676
1419598_at	membrane-spanning 4-domains, subfamily A, member 6D	Ms4a6d	87.8693	14.7309	5.96498	0.00492234	Yes	No	0007165 // signal transduction // inferred from electronic annotation	0016020 // membrane // inferred from electronic annotation /// 0016021 // integral to membrane // inferred from electronic annotation	0004872 // receptor activity // inferred from electronic annotation	3.76806	3.66889	4.20536	6.33871	6.7132	6.31995	5.41369	5.19584	4.83436	6.45729	3.88077	5.14796
1453035_at	limb and neural patterns	Lnp	182.757	30.7055	5.95194	0.00417426	Yes	No	0007275 // multicellular organismal development // inferred from electronic annotation /// 0007596 // blood coagulation // inferred from mutant phenotype /// 0035115 // embryonic forelimb morphogenesis // inferred from mutant phenotype /// 0042733 // embryonic digit morphogenesis // inferred from genetic interaction	0016020 // membrane // inferred from electronic annotation /// 0016021 // integral to membrane // inferred from electronic annotation	0005515 // protein binding // inferred from electronic annotation	4.87721	4.99139	4.95268	7.76627	7.36947	7.40562	6.73564	6.23827	6.91724	7.51379	4.94043	6.63038
1418507_s_at	suppressor of cytokine signaling 2	Socs2	1424.26	240.901	5.91223	0.00425618	Yes	No	0001558 // regulation of cell growth // inferred from electronic annotation /// 0006511 // ubiquitin-dependent protein catabolic process // inferred from electronic annotation /// 0007242 // intracellular signaling cascade // inferred from mutant phenotype /// 0007242 // intracellular signaling cascade // inferred from electronic annotation /// 0009968 // negative regulation of signal transductio…	---	0005131 // growth hormone receptor binding // inferred from physical interaction /// 0005159 // insulin-like growth factor receptor binding // inferred from sequence or structural similarity /// 0005515 // protein binding // inferred from physical interaction /// 0005515 // protein binding // inferred from electronic annotation	7.7943	7.82732	8.11527	10.5996	10.2819	10.5465	7.83542	7.88413	8.34745	10.476	7.9123	8.02233
1418152_at	nucleosome binding protein 1	Nsbp1	1603.68	272.914	5.87613	0.00476976	Yes	No	0006350 // transcription // inferred from electronic annotation /// 0006355 // regulation of transcription, DNA-dependent // inferred from electronic annotation /// 0006356 // regulation of transcription from RNA polymerase I promoter // inferred from direct assay	0000785 // chromatin // inferred from electronic annotation /// 0005634 // nucleus // inferred from electronic annotation /// 0005654 // nucleoplasm // inferred from direct assay	0003677 // DNA binding // inferred from electronic annotation /// 0003682 // chromatin binding // inferred from direct assay	8.14367	7.8254	8.30783	10.5622	10.9194	10.4599	10.0156	10.2259	9.28521	10.6472	8.0923	9.84224
1441955_s_at	similar to poly(A) binding protein interacting protein 1 /// polyadenylate bindi	LOC676674 /// Paip1	104.688	17.8477	5.86565	0.00430444	Yes	No	0006417 // regulation of translation // inferred from electronic annotation /// 0016070 // RNA metabolic process // inferred from electronic annotation	0005737 // cytoplasm // inferred from electronic annotation	0005488 // binding // inferred from electronic annotation /// 0005515 // protein binding // inferred from electronic annotation	4.10228	3.95502	4.41569	6.57207	6.83913	6.71866	5.16607	5.52795	4.86308	6.70995	4.15766	5.1857
1438750_at	Alpha thalassemia/mental retardation syndrome X-linked homolog (human) (Atrx), m	Atrx	260.71	44.4628	5.86356	0.00397645	Yes	No	0006281 // DNA repair // inferred from electronic annotation /// 0006355 // regulation of transcription, DNA-dependent // inferred from electronic annotation /// 0006974 // response to DNA damage stimulus // inferred from electronic annotation /// 0030900 // forebrain development // inferred from mutant phenotype	0000228 // nuclear chromosome // inferred from direct assay /// 0000792 // heterochromatin // inferred from direct assay /// 0005634 // nucleus // inferred from direct assay /// 0005634 // nucleus // inferred from electronic annotation	0000166 // nucleotide binding // inferred from electronic annotation /// 0003676 // nucleic acid binding // inferred from electronic annotation /// 0003677 // DNA binding // inferred from electronic annotation /// 0003682 // chromatin binding // inferred from direct assay /// 0003700 // transcription factor activity // inferred from electronic annotation /// 0004386 // helicase activity // inferr…	5.47058	5.31464	5.63836	7.9299	7.988	8.16101	7.16101	6.55752	6.62218	8.0263	5.47453	6.78024
1429058_at	transmembrane protein 107	Tmem107	379.257	64.9497	5.83925	0.00492234	Yes	No	---	0016020 // membrane // inferred from electronic annotation /// 0016021 // integral to membrane // inferred from electronic annotation	---	6.04861	5.74867	6.26647	8.84023	8.47416	8.38671	7.21586	6.96389	6.91787	8.56703	6.02125	7.03254
1423347_at	SEC23A (S. cerevisiae)	Sec23a	923.164	158.98	5.8068	0.00293081	Yes	No	0006810 // transport // inferred from electronic annotation /// 0006886 // intracellular protein transport // traceable author statement /// 0006886 // intracellular protein transport // inferred from electronic annotation /// 0006888 // ER to Golgi vesicle-mediated transport // inferred from electronic annotation /// 0015031 // protein transport // inferred from electronic annotation /// 0016192…	0000139 // Golgi membrane // inferred from direct assay /// 0000139 // Golgi membrane // inferred from electronic annotation /// 0005783 // endoplasmic reticulum // inferred from electronic annotation /// 0005794 // Golgi apparatus // inferred from electronic annotation /// 0016020 // membrane // inferred from electronic annotation /// 0030127 // COPII vesicle coat // inferred from electronic ann…	0005515 // protein binding // inferred from electronic annotation /// 0008270 // zinc ion binding // inferred from electronic annotation	7.47559	7.25592	7.20659	9.87486	9.85405	9.82242	7.9939	7.82212	7.99899	9.85044	7.3127	7.93834
1426240_at	chromatin modifying protein 4B /// similar to zinc finger protein 341	Chmp4b /// LOC674706	1781.61	307.078	5.80182	0.00459075	Yes	No	0006810 // transport // inferred from electronic annotation /// 0015031 // protein transport // inferred from electronic annotation	0005737 // cytoplasm // inferred from electronic annotation	---	8.54118	7.97477	8.27143	10.6972	10.9251	10.7746	9.91824	9.96187	9.73735	10.799	8.26246	9.87249
1433585_at	transportin 1	Tnpo1	1074.72	185.83	5.78336	0.00424039	Yes	No	0000059 // protein import into nucleus, docking // inferred from electronic annotation /// 0006810 // transport // inferred from electronic annotation /// 0006886 // intracellular protein transport // inferred from electronic annotation /// 0015031 // protein transport // inferred from electronic annotation	0005634 // nucleus // inferred from electronic annotation /// 0005643 // nuclear pore // inferred from electronic annotation /// 0005737 // cytoplasm // inferred from electronic annotation	0005488 // binding // inferred from electronic annotation /// 0005515 // protein binding // inferred from electronic annotation /// 0008565 // protein transporter activity // inferred from electronic annotation	7.75	7.33241	7.5311	10.1723	10.0977	9.93923	9.9205	9.79315	9.48133	10.0697	7.53784	9.73166
1427061_at	retinoblastoma binding protein 8	Rbbp8	1281.43	225.069	5.69348	0.00440516	Yes	No	0000082 // G1/S transition of mitotic cell cycle // inferred from mutant phenotype /// 0001835 // blastocyst hatching // inferred from mutant phenotype	---	---	7.99999	7.4894	7.95328	10.3042	10.2889	10.3775	9.60156	9.47827	9.42011	10.3235	7.81422	9.49998
1455486_at	protein inhibitor of activated STAT 1	Pias1	349.933	61.51	5.68903	0.00496293	Yes	No	0006350 // transcription // inferred from electronic annotation /// 0006355 // regulation of transcription, DNA-dependent // inferred from electronic annotation /// 0006511 // ubiquitin-dependent protein catabolic process // inferred from electronic annotation /// 0007259 // JAK-STAT cascade // not recorded	0005634 // nucleus // inferred from electronic annotation /// 0016607 // nuclear speck // inferred from electronic annotation	0003676 // nucleic acid binding // inferred from electronic annotation /// 0003677 // DNA binding // inferred from electronic annotation /// 0003714 // transcription corepressor activity // not recorded /// 0005515 // protein binding // inferred from electronic annotation /// 0008270 // zinc ion binding // inferred from electronic annotation /// 0046872 // metal ion binding // inferred from elect…	6.09516	5.63609	6.097	8.26848	8.71399	8.37033	8.11624	8.16586	7.72794	8.45093	5.94275	8.00335
1428796_at	bobby sox homolog (Drosophila)	Bbx	418.677	73.8804	5.66695	0.00417426	Yes	No	0006350 // transcription // inferred from electronic annotation /// 0006355 // regulation of transcription, DNA-dependent // inferred from electronic annotation	0005634 // nucleus // inferred from electronic annotation	0003677 // DNA binding // inferred from electronic annotation	6.40095	6.13455	6.08586	8.61386	8.635	8.88022	7.73352	7.55793	7.7211	8.70969	6.20712	7.67085
1420028_s_at	similar to DNA replication licensing factor MCM3 (DNA polymerase alpha holoenzym	LOC100045677 /// Mcm3	1939.32	344.261	5.63327	0.00417426	Yes	No	0006260 // DNA replication // inferred from electronic annotation /// 0006270 // DNA replication initiation // inferred from electronic annotation /// 0006350 // transcription // inferred from electronic annotation /// 0006355 // regulation of transcription, DNA-dependent // inferred from electronic annotation /// 0007049 // cell cycle // inferred from electronic annotation	0005634 // nucleus // inferred from electronic annotation	0000166 // nucleotide binding // inferred from electronic annotation /// 0003677 // DNA binding // inferred from electronic annotation /// 0005515 // protein binding // inferred from electronic annotation /// 0005524 // ATP binding // inferred from electronic annotation /// 0017111 // nucleoside-triphosphatase activity // inferred from electronic annotation	8.67968	8.27706	8.32534	10.9676	10.9301	10.8663	9.62393	9.33229	9.48506	10.9213	8.42736	9.48043
1437539_at	protein kinase, AMP-activated, alpha 1 catalytic subunit	Prkaa1	200.596	35.6129	5.63267	0.00496477	Yes	No	0006006 // glucose metabolic process // inferred from mutant phenotype /// 0006468 // protein amino acid phosphorylation // inferred from electronic annotation /// 0006633 // fatty acid biosynthetic process // inferred from electronic annotation /// 0006694 // steroid biosynthetic process // inferred from electronic annotation /// 0006695 // cholesterol biosynthetic process // inferred from elect…	---	0000166 // nucleotide binding // inferred from electronic annotation /// 0000287 // magnesium ion binding // inferred from electronic annotation /// 0004672 // protein kinase activity // inferred from electronic annotation /// 0004674 // protein serine/threonine kinase activity // inferred from electronic annotation /// 0005524 // ATP binding // inferred from electronic annotation /// 0016301 // …	5.15202	4.84868	5.46229	7.44864	7.78274	7.71307	6.89377	7.03326	6.41007	7.64815	5.15433	6.77903
1452598_at	GINS complex subunit 1 (Psf1 homolog)	Gins1	480.03	85.6913	5.60185	0.00470066	Yes	No	0001833 // inner cell mass cell proliferation // inferred from mutant phenotype /// 0006260 // DNA replication // inferred from mutant phenotype /// 0006260 // DNA replication // inferred from electronic annotation	0005634 // nucleus // inferred from direct assay /// 0005634 // nucleus // inferred from electronic annotation /// 0005737 // cytoplasm // inferred from direct assay /// 0005737 // cytoplasm // inferred from electronic annotation	0005515 // protein binding // inferred from physical interaction	6.6856	6.15758	6.42005	9.07556	8.94837	8.69701	8.17995	7.83734	7.53936	8.90698	6.42108	7.85222
1418206_at	stromal cell-derived factor 2-like 1	Sdf2l1	605.062	108.366	5.5835	0.00417426	Yes	No	---	0005783 // endoplasmic reticulum // not recorded /// 0005783 // endoplasmic reticulum // inferred from electronic annotation /// 0005788 // endoplasmic reticulum lumen // inferred from electronic annotation /// 0016020 // membrane // inferred from electronic annotation	---	6.80992	6.8015	6.66789	9.44791	9.04859	9.22632	8.00891	7.30424	7.09438	9.24094	6.75977	7.46918
1426416_a_at	Yip1 domain family, member 4	Yipf4	1735.02	310.762	5.5831	0.00414948	Yes	No	---	0016020 // membrane // inferred from electronic annotation /// 0016021 // integral to membrane // inferred from electronic annotation	---	8.44904	8.07285	8.31711	10.7545	10.6805	10.8472	9.6995	9.61722	9.06766	10.7607	8.27967	9.46146
1449140_at	NudC domain containing 2	Nudcd2	358.66	64.5076	5.55997	0.00424039	Yes	No	---	0005622 // intracellular // inferred from electronic annotation	---	6.14649	5.77763	6.11007	8.40798	8.60456	8.44688	8.14706	8.14706	7.73859	8.48647	6.0114	8.0109
1454739_at	cell division cycle 27 homolog (S. cerevisiae)	Cdc27	641.72	116.362	5.51487	0.00397645	Yes	No	0007091 // mitotic metaphase/anaphase transition // not recorded /// 0051301 // cell division // inferred from electronic annotation	0005813 // centrosome // not recorded /// 0005876 // spindle microtubule // not recorded	0005488 // binding // inferred from electronic annotation	6.95226	6.7755	6.85966	9.22434	9.50819	9.24487	8.2528	8.20689	7.93787	9.3258	6.86247	8.13252
1460359_at	armadillo repeat containing, X-linked 3 /// hypothetical protein LOC100044266	Armcx3 /// LOC100044266	367.143	67.695	5.42348	0.00430444	Yes	No	---	0016020 // membrane // inferred from electronic annotation /// 0016021 // integral to membrane // inferred from electronic annotation	0005488 // binding // inferred from electronic annotation	6.29233	5.83613	6.11447	8.58267	8.57791	8.40001	8.14004	8.28271	7.38895	8.5202	6.08098	7.93723
1425048_a_at	predicted gene, ENSMUSG00000060128 /// high mobility group box 1 /// similar to	ENSMUSG00000060128 /// Hmgb1 /// LOC100045876 /// LOC100045972 /// LOC100048378	5082.54	952.95	5.33348	0.00397645	Yes	No	0006809 // nitric oxide biosynthetic process // inferred from direct assay /// 0006810 // transport // inferred from direct assay	0005615 // extracellular space // inferred from direct assay /// 0005634 // nucleus // traceable author statement /// 0005634 // nucleus // inferred from electronic annotation /// 0005694 // chromosome // inferred from electronic annotation /// 0005737 // cytoplasm // inferred from electronic annotation	0003677 // DNA binding // inferred from electronic annotation /// 0005515 // protein binding // inferred from physical interaction /// 0008201 // heparin binding // inferred from electronic annotation /// 0030235 // nitric-oxide synthase regulator activity // inferred from direct assay	9.97019	9.97462	9.74396	12.3038	12.445	12.1852	12.3895	12.3362	11.61	12.3113	9.89626	12.1119
1431037_a_at	ELAV (embryonic lethal, abnormal vision, Drosophila)-like 1 (Hu antigen R)	Elavl1	392.379	74.5371	5.26421	0.00459075	Yes	No	0048255 // mRNA stabilization // inferred from mutant phenotype	0005634 // nucleus // inferred from direct assay	0000166 // nucleotide binding // inferred from electronic annotation /// 0003676 // nucleic acid binding // inferred from electronic annotation /// 0003723 // RNA binding // inferred from electronic annotation /// 0042802 // identical protein binding // inferred from electronic annotation	6.27155	5.93031	6.4578	8.74431	8.61646	8.48754	7.95443	7.82891	7.59667	8.6161	6.21989	7.79334
1424020_at	ADP-ribosylation factor-like 6 interacting protein 6	Arl6ip6	1208.47	230.281	5.2478	0.00459075	Yes	No	---	0016020 // membrane // inferred from electronic annotation /// 0016021 // integral to membrane // inferred from electronic annotation	0005515 // protein binding // inferred from physical interaction	7.72882	7.68224	8.1307	10.0639	10.3508	10.3022	8.96159	8.87524	8.62829	10.239	7.84725	8.82171
1425166_at	retinoblastoma-like 1 (p107)	Rbl1	504.091	96.1979	5.24014	0.00430444	Yes	No	0000122 // negative regulation of transcription from RNA polymerase II promoter // inferred from mutant phenotype /// 0006350 // transcription // inferred from electronic annotation /// 0006355 // regulation of transcription, DNA-dependent // inferred from electronic annotation /// 0007049 // cell cycle // inferred from electronic annotation /// 0016568 // chromatin modification // inferred from …	0005634 // nucleus // inferred from direct assay /// 0005634 // nucleus // inferred from electronic annotation /// 0005667 // transcription factor complex // inferred from direct assay	0005515 // protein binding // inferred from physical interaction /// 0005515 // protein binding // inferred from electronic annotation	6.33333	6.76749	6.66298	8.94814	8.92611	9.05837	7.37793	7.26819	6.84114	8.97754	6.58793	7.16242
1418895_at	src family associated phosphoprotein 2	Skap2	2301.14	445.151	5.16935	0.00260836	Yes	No	0008285 // negative regulation of cell proliferation // inferred from mutant phenotype /// 0042113 // B cell activation // inferred from electronic annotation	0005737 // cytoplasm // inferred from direct assay /// 0005737 // cytoplasm // inferred from electronic annotation /// 0005886 // plasma membrane // not recorded /// 0005886 // plasma membrane // inferred from electronic annotation	---	8.85865	8.7548	8.781	11.058	11.1711	11.2753	10.6815	10.5277	10.0565	11.1681	8.79815	10.4219
1437478_s_at	EF hand domain containing 2	Efhd2	1737.1	339.758	5.11276	0.00467884	Yes	No	---	---	0005509 // calcium ion binding // inferred from direct assay /// 0005509 // calcium ion binding // inferred from electronic annotation /// 0005515 // protein binding // inferred from physical interaction	8.23047	8.25697	8.73765	10.7186	10.859	10.7098	10.0514	9.54846	10.2459	10.7625	8.40836	9.94859
1435702_s_at	tyrosine 3-monooxygenase/tryptophan 5-monooxygenase activation protein, epsilon	Ywhae	512.421	100.46	5.10073	0.00476976	Yes	No	0001764 // neuron migration // inferred from genetic interaction /// 0001764 // neuron migration // inferred from mutant phenotype /// 0006605 // protein targeting // inferred from direct assay /// 0021766 // hippocampus development // inferred from mutant phenotype /// 0021987 // cerebral cortex development // inferred from mutant phenotype /// 0035308 // negative regulation of protein amino aci…	0005737 // cytoplasm // inferred from electronic annotation /// 0005739 // mitochondrion // inferred from direct assay /// 0042470 // melanosome // inferred from electronic annotation	0004497 // monooxygenase activity // inferred from electronic annotation /// 0005515 // protein binding // inferred from physical interaction /// 0019904 // protein domain specific binding // inferred from direct assay /// 0019904 // protein domain specific binding // inferred from electronic annotation	6.85164	6.2985	6.80131	8.94888	9.08825	8.96643	8.55598	8.31785	8.60805	9.00119	6.65048	8.49396
1431050_at	ribosomal protein S6 kinase, polypeptide 5	Rps6ka5	75.778	14.9197	5.07904	0.00434304	Yes	No	0006355 // regulation of transcription, DNA-dependent // inferred from direct assay /// 0006355 // regulation of transcription, DNA-dependent // inferred from electronic annotation /// 0006468 // protein amino acid phosphorylation // inferred from direct assay /// 0006468 // protein amino acid phosphorylation // inferred from electronic annotation /// 0006950 // response to stress // inferred fro…	0005634 // nucleus // inferred from direct assay /// 0005634 // nucleus // inferred from electronic annotation	0000166 // nucleotide binding // inferred from electronic annotation /// 0000287 // magnesium ion binding // inferred from electronic annotation /// 0004672 // protein kinase activity // inferred from electronic annotation /// 0004674 // protein serine/threonine kinase activity // inferred from direct assay /// 0004674 // protein serine/threonine kinase activity // inferred from electronic annota…	4.03883	3.73318	3.92544	6.27155	6.43704	6.02253	4.93861	4.64373	4.98326	6.24371	3.89915	4.8552
1455156_at	striatin, calmodulin binding protein	Strn	590.717	117.879	5.0112	0.00470066	Yes	No	---	0005737 // cytoplasm // inferred from electronic annotation /// 0016020 // membrane // inferred from electronic annotation	0005516 // calmodulin binding // inferred from electronic annotation	7.03958	6.53026	7.07366	9.23319	9.21175	9.17403	8.99505	9.01049	8.62825	9.20632	6.88117	8.87793
1417471_s_at	DNA segment, Chr 1, ERATO Doi 622, expressed	D1Ertd622e	540.483	109.341	4.94309	0.00260836	Yes	No	---	---	---	6.84855	6.65269	6.81684	9.12805	9.0455	9.06077	8.55322	8.30087	8.19581	9.07811	6.77269	8.34997
1424902_at	plexin domain containing 1	Plxdc1	330.801	67.6104	4.89275	0.0046807	Yes	No	---	0005886 // plasma membrane // not recorded /// 0016020 // membrane // inferred from electronic annotation /// 0016021 // integral to membrane // inferred from electronic annotation	---	6.24115	6.20443	5.79194	8.50095	8.19288	8.41563	8.22168	7.93233	7.87318	8.36982	6.07917	8.00906
1424243_at	RWD domain containing 4A	Rwdd4a	384.716	78.6321	4.89261	0.00459075	Yes	No	---	---	---	6.56381	6.06671	6.26062	8.4599	8.71052	8.59253	8.61482	8.53828	7.21371	8.58765	6.29705	8.12227
1457321_at	RIKEN cDNA D130037M23 gene	D130037M23Rik	193.175	39.6757	4.86885	0.00440516	Yes	No	---	---	---	5.43633	5.12537	5.36885	7.81972	7.54972	7.41185	5.01779	5.09177	5.23574	7.59376	5.31018	5.1151
1424924_at	SEC63-like (S. cerevisiae)	Sec63	322.639	66.3412	4.86333	0.00253592	Yes	No	0006457 // protein folding // inferred from electronic annotation /// 0006810 // transport // inferred from electronic annotation /// 0015031 // protein transport // inferred from electronic annotation	0005783 // endoplasmic reticulum // inferred from electronic annotation /// 0005789 // endoplasmic reticulum membrane // inferred from electronic annotation /// 0016020 // membrane // inferred from electronic annotation /// 0016021 // integral to membrane // inferred from electronic annotation	0031072 // heat shock protein binding // inferred from electronic annotation /// 0051082 // unfolded protein binding // inferred from electronic annotation	6.04548	5.99132	6.1187	8.26665	8.31553	8.41915	7.35219	7.50467	6.5215	8.33378	6.05183	7.12612
1428976_at	thymopoietin	Tmpo	1105.05	227.705	4.85301	0.00440516	Yes	No	0045449 // regulation of transcription // inferred from direct assay	0000785 // chromatin // not recorded /// 0005634 // nucleus // not recorded /// 0005634 // nucleus // inferred from electronic annotation /// 0005635 // nuclear envelope // inferred from direct assay /// 0005635 // nuclear envelope // inferred from electronic annotation /// 0005637 // nuclear inner membrane // inferred from electronic annotation /// 0005694 // chromosome // inferred from electron…	0003677 // DNA binding // inferred from electronic annotation /// 0005515 // protein binding // inferred from physical interaction /// 0005515 // protein binding // not recorded	7.9857	7.54201	7.96535	10.0311	10.1182	10.1804	9.58025	9.44309	9.12048	10.1099	7.83102	9.38127
1452247_at	fragile X mental retardation gene 1, autosomal homolog	Fxr1	123.478	25.4639	4.84914	0.00478369	Yes	No	0007275 // multicellular organismal development // inferred from electronic annotation /// 0007517 // muscle development // inferred from mutant phenotype /// 0007519 // skeletal muscle development // inferred from electronic annotation /// 0030154 // cell differentiation // inferred from electronic annotation	0005737 // cytoplasm // inferred from electronic annotation /// 0043034 // costamere // inferred from direct assay	0003723 // RNA binding // inferred from electronic annotation /// 0005515 // protein binding // inferred from physical interaction	4.41575	4.78677	4.80863	6.93283	7.17142	6.74009	7.11916	7.26147	6.06616	6.94811	4.67038	6.8156
1418622_at	RAB2A, member RAS oncogene family	Rab2a	1087.1	225.246	4.82625	0.00434304	Yes	No	0006810 // transport // inferred from electronic annotation /// 0006886 // intracellular protein transport // traceable author statement /// 0007264 // small GTPase mediated signal transduction // inferred from electronic annotation /// 0015031 // protein transport // inferred from electronic annotation /// 0016192 // vesicle-mediated transport // inferred from electronic annotation	0000139 // Golgi membrane // inferred from electronic annotation /// 0005783 // endoplasmic reticulum // inferred from electronic annotation /// 0005789 // endoplasmic reticulum membrane // inferred from electronic annotation /// 0005794 // Golgi apparatus // inferred from direct assay /// 0005794 // Golgi apparatus // inferred from electronic annotation /// 0016020 // membrane // inferred from e…	0000166 // nucleotide binding // inferred from electronic annotation /// 0005525 // GTP binding // inferred from electronic annotation	7.86972	7.57731	7.99905	10.064	10.2264	9.96839	8.68134	8.56342	8.4029	10.0863	7.81536	8.54922
1434408_at	ataxin 3	Atxn3	216.328	44.958	4.81178	0.00430444	Yes	No	0006350 // transcription // inferred from electronic annotation /// 0006355 // regulation of transcription, DNA-dependent // inferred from electronic annotation	0005634 // nucleus // inferred from electronic annotation /// 0005737 // cytoplasm // inferred from direct assay /// 0042405 // nuclear inclusion body // inferred from direct assay	0005515 // protein binding // inferred from physical interaction /// 0016787 // hydrolase activity // inferred from electronic annotation	5.71533	5.27169	5.4845	7.68374	7.84202	7.74547	7.48204	7.7635	6.72413	7.75708	5.49051	7.32322
1448441_at	CDC28 protein kinase 1b	Cks1b	253.071	52.9422	4.78014	0.00380785	Yes	No	0007049 // cell cycle // inferred from electronic annotation /// 0051301 // cell division // inferred from electronic annotation	---	0016538 // cyclin-dependent protein kinase regulator activity // inferred from electronic annotation	5.69571	5.68025	5.80308	8.10442	8.02401	7.82177	6.25882	5.70619	5.81992	7.9834	5.72635	5.92831
1448571_a_at	glia maturation factor, beta	Gmfb	593.963	124.326	4.77747	0.00492234	Yes	No	---	0005622 // intracellular // inferred from electronic annotation	0003779 // actin binding // inferred from electronic annotation /// 0008083 // growth factor activity // inferred from electronic annotation	6.81436	6.92814	7.13145	9.51098	9.15311	8.9786	8.07519	8.28406	7.54873	9.21423	6.95798	7.96933
1451315_at	transmembrane protein 101	Tmem101	183.973	38.572	4.76961	0.00397645	Yes	No	0043123 // positive regulation of I-kappaB kinase/NF-kappaB cascade // inferred from electronic annotation	0016020 // membrane // inferred from electronic annotation /// 0016021 // integral to membrane // inferred from electronic annotation	0004871 // signal transducer activity // inferred from electronic annotation	5.40141	5.21643	5.19061	7.43946	7.66884	7.46176	6.76823	6.84759	5.77102	7.52335	5.26948	6.46228
1424105_a_at	pituitary tumor-transforming gene 1	Pttg1	648.346	136.212	4.75983	0.00491091	Yes	No	0006259 // DNA metabolic process // inferred from electronic annotation /// 0006281 // DNA repair // inferred from electronic annotation /// 0006974 // response to DNA damage stimulus // inferred from electronic annotation /// 0007049 // cell cycle // inferred from electronic annotation /// 0007059 // chromosome segregation // inferred from electronic annotation /// 0007067 // mitosis // inferred…	0005634 // nucleus // inferred from electronic annotation /// 0005737 // cytoplasm // inferred from electronic annotation	0004869 // cysteine protease inhibitor activity // inferred from direct assay /// 0017124 // SH3 domain binding // inferred from electronic annotation	7.18985	7.08086	6.99842	9.23668	9.67464	9.11054	7.20612	6.6443	7.03104	9.34062	7.08971	6.96049
1455488_at	RIKEN cDNA 6230416J20 gene	6230416J20Rik	418.241	88.3754	4.73255	0.00430444	Yes	No	---	---	---	6.52685	6.28207	6.5878	8.75091	8.86939	8.50427	8.22295	8.04149	7.8431	8.70819	6.46557	8.03585
1434884_at	metadherin	Mtdh	300.626	63.82	4.71053	0.00446687	Yes	No	---	0005634 // nucleus // inferred from electronic annotation /// 0005783 // endoplasmic reticulum // inferred from electronic annotation /// 0005789 // endoplasmic reticulum membrane // inferred from electronic annotation /// 0005923 // tight junction // inferred from electronic annotation /// 0016020 // membrane // inferred from electronic annotation /// 0016021 // integral to membrane // inferred …	0005515 // protein binding // inferred from electronic annotation	5.95031	5.83345	6.20405	8.42399	8.21725	8.05424	7.63844	7.31835	6.74384	8.23183	5.99594	7.23354
1415945_at	minichromosome maintenance deficient 5, cell division cycle 46 (S. cerevisiae)	Mcm5	1183.35	254.989	4.6408	0.00430444	Yes	No	0006260 // DNA replication // inferred from electronic annotation /// 0006270 // DNA replication initiation // inferred from electronic annotation /// 0006350 // transcription // inferred from electronic annotation /// 0006355 // regulation of transcription, DNA-dependent // inferred from electronic annotation /// 0051301 // cell division // inferred from electronic annotation	0005634 // nucleus // inferred from electronic annotation	0000166 // nucleotide binding // inferred from electronic annotation /// 0003677 // DNA binding // inferred from electronic annotation /// 0005515 // protein binding // inferred from electronic annotation /// 0005524 // ATP binding // inferred from electronic annotation	8.24384	7.89839	7.84065	10.2416	10.1653	10.2191	9.50561	9.02774	8.82499	10.2087	7.99429	9.11945
1421077_at	SERTA domain containing 3	Sertad3	779.679	168.917	4.61576	0.00430444	Yes	No	0006350 // transcription // inferred from electronic annotation /// 0006355 // regulation of transcription, DNA-dependent // inferred from electronic annotation /// 0030308 // negative regulation of cell growth // not recorded /// 0030308 // negative regulation of cell growth // inferred from electronic annotation /// 0045941 // positive regulation of transcription // inferred from direct assay	0005634 // nucleus // not recorded /// 0005634 // nucleus // inferred from electronic annotation /// 0005737 // cytoplasm // not recorded	0005515 // protein binding // inferred from physical interaction /// 0005515 // protein binding // inferred from electronic annotation /// 0016563 // transcription activator activity // inferred from direct assay	7.55497	7.43728	7.20826	9.69721	9.68869	9.43431	8.75832	8.79485	7.98115	9.60674	7.40017	8.51144
1429712_at	RIKEN cDNA 6230416C02 gene /// ethanol induced 1 /// KRAB box and zinc finger, C	6230416C02Rik /// Etohi1 /// RP24-87L14.2	116.355	25.2999	4.59902	0.0046807	Yes	No	0006355 // regulation of transcription, DNA-dependent // inferred from electronic annotation	0005622 // intracellular // inferred from electronic annotation /// 0005634 // nucleus // inferred from electronic annotation	0003676 // nucleic acid binding // inferred from electronic annotation /// 0008270 // zinc ion binding // inferred from electronic annotation /// 0046872 // metal ion binding // inferred from electronic annotation	4.69928	4.56444	4.71946	7.03699	6.99813	6.55204	4.88456	4.72377	4.86107	6.86239	4.66106	4.82313
1418334_at	DBF4 homolog (S. cerevisiae)	Dbf4	1050.73	229.599	4.57636	0.0046807	Yes	No	0006260 // DNA replication // inferred from electronic annotation /// 0007049 // cell cycle // inferred from electronic annotation /// 0007089 // traversing start control point of mitotic cell cycle // not recorded /// 0007090 // regulation of S phase of mitotic cell cycle // not recorded	0005622 // intracellular // inferred from electronic annotation /// 0005634 // nucleus // inferred from direct assay /// 0005634 // nucleus // inferred from electronic annotation	0003676 // nucleic acid binding // inferred from electronic annotation /// 0004674 // protein serine/threonine kinase activity // not recorded /// 0005515 // protein binding // inferred from electronic annotation /// 0008270 // zinc ion binding // inferred from electronic annotation /// 0046872 // metal ion binding // inferred from electronic annotation	7.876	7.58422	8.0687	10.182	10.0111	9.91842	8.97195	8.9699	8.51919	10.0372	7.84297	8.82035
1431087_at	SPC24, NDC80 kinetochore complex component, homolog (S. cerevisiae)	Spc24	340.516	74.4567	4.57335	0.0046807	Yes	No	0007049 // cell cycle // inferred from electronic annotation /// 0007067 // mitosis // inferred from electronic annotation /// 0051301 // cell division // inferred from electronic annotation	0000777 // condensed chromosome kinetochore // inferred from electronic annotation /// 0005634 // nucleus // inferred from electronic annotation	---	6.07612	6.40429	6.17458	8.54865	8.53912	8.14697	7.72832	7.33277	6.90383	8.41158	6.21833	7.32164
1416868_at	cyclin-dependent kinase inhibitor 2C (p18, inhibits CDK4)	Cdkn2c	1264.28	276.555	4.57153	0.00459075	Yes	No	0000079 // regulation of cyclin-dependent protein kinase activity // inferred from electronic annotation /// 0000082 // G1/S transition of mitotic cell cycle // inferred from electronic annotation /// 0006917 // induction of apoptosis // inferred from electronic annotation /// 0007049 // cell cycle // inferred from electronic annotation /// 0007050 // cell cycle arrest // inferred from electronic…	0005634 // nucleus // inferred from electronic annotation /// 0005737 // cytoplasm // inferred from electronic annotation	0004861 // cyclin-dependent protein kinase inhibitor activity // inferred from electronic annotation /// 0005515 // protein binding // inferred from electronic annotation /// 0016301 // kinase activity // inferred from electronic annotation /// 0019901 // protein kinase binding // inferred from electronic annotation	8.23641	8.0829	8.01496	10.163	10.5888	10.1605	8.51756	8.35134	8.44657	10.3041	8.11142	8.43849
1422554_at	necdin-like 2	Ndnl2	377.622	83.3097	4.53275	0.00440516	Yes	No	0001558 // regulation of cell growth // inferred from electronic annotation /// 0006355 // regulation of transcription, DNA-dependent // inferred from direct assay	0005634 // nucleus // inferred from electronic annotation /// 0005737 // cytoplasm // inferred from electronic annotation	0005515 // protein binding // inferred from physical interaction	6.61602	6.40294	6.12228	8.6094	8.5081	8.5649	7.53652	7.47618	7.18603	8.5608	6.38041	7.39958
1448883_at	legumain	Lgmn	554.558	123.779	4.48023	0.00497381	Yes	No	0006508 // proteolysis // inferred from direct assay /// 0006508 // proteolysis // inferred from electronic annotation /// 0040015 // negative regulation of multicellular organism growth // inferred from mutant phenotype	0005764 // lysosome // inferred from electronic annotation /// 0005770 // late endosome // inferred from direct assay /// 0045177 // apical part of cell // inferred from direct assay	0004197 // cysteine-type endopeptidase activity // inferred from electronic annotation /// 0008233 // peptidase activity // inferred from mutant phenotype /// 0008233 // peptidase activity // inferred from electronic annotation /// 0008234 // cysteine-type peptidase activity // inferred from electronic annotation /// 0016787 // hydrolase activity // inferred from electronic annotation	7.07399	6.88179	6.89908	9.01762	8.88795	9.44001	7.71337	7.23335	7.23686	9.11519	6.95162	7.39453
1429897_a_at	DNA segment, Chr 16, ERATO Doi 472, expressed	D16Ertd472e	990.42	221.216	4.47716	0.0046807	Yes	No	---	---	---	7.82738	7.64693	7.89363	10.1418	9.67799	10.0359	9.13564	9.12444	9.14483	9.9519	7.78931	9.13497
1425098_at	zinc finger protein 106	Zfp106	84.6661	18.9251	4.47376	0.00440516	Yes	No	0008286 // insulin receptor signaling pathway // inferred from direct assay	0005622 // intracellular // inferred from electronic annotation /// 0005624 // membrane fraction // inferred from direct assay /// 0005634 // nucleus // inferred from electronic annotation /// 0005737 // cytoplasm // inferred from electronic annotation /// 0005829 // cytosol // inferred from direct assay	0001515 // opioid peptide activity // inferred from physical interaction /// 0008270 // zinc ion binding // inferred from electronic annotation /// 0017124 // SH3 domain binding // inferred from direct assay /// 0046872 // metal ion binding // inferred from electronic annotation	4.12267	4.20217	4.40184	6.55183	6.17335	6.48596	5.01693	4.82298	5.02386	6.40371	4.24223	4.95459
1437904_at	RNA binding motif protein 45	Rbm45	1440.85	322.458	4.46832	0.00430444	Yes	No	0007275 // multicellular organismal development // inferred from electronic annotation /// 0007399 // nervous system development // inferred from electronic annotation /// 0007399 // nervous system development // inferred from sequence or structural similarity /// 0030154 // cell differentiation // inferred from electronic annotation	0005634 // nucleus // inferred from electronic annotation /// 0005634 // nucleus // inferred from sequence or structural similarity /// 0005737 // cytoplasm // not recorded /// 0005737 // cytoplasm // inferred from electronic annotation /// 0005737 // cytoplasm // inferred from sequence or structural similarity	0000166 // nucleotide binding // inferred from electronic annotation /// 0003676 // nucleic acid binding // inferred from electronic annotation /// 0003723 // RNA binding // not recorded /// 0003723 // RNA binding // inferred from electronic annotation /// 0003723 // RNA binding // inferred from sequence or structural similarity	8.52915	8.08941	8.38034	10.5852	10.4471	10.4458	10.3145	10.155	10.1194	10.4927	8.33297	10.1963
1435167_at	RAN binding protein 6	Ranbp6	156.48	35.0397	4.46577	0.00395556	Yes	No	0006810 // transport // inferred from electronic annotation /// 0015031 // protein transport // inferred from electronic annotation	0005634 // nucleus // inferred from electronic annotation /// 0005737 // cytoplasm // inferred from electronic annotation	0005488 // binding // inferred from electronic annotation	5.10382	5.14871	5.14023	7.1681	7.46555	7.23584	6.22214	6.22214	5.95042	7.28983	5.13092	6.13157
1421895_at	eukaryotic translation initiation factor 2, subunit 3, structural gene X-linked	Eif2s3x /// LOC100048746	345.203	77.4666	4.45615	0.00492234	Yes	No	0006412 // translation // inferred from electronic annotation /// 0006413 // translational initiation // inferred from sequence or structural similarity	---	0000166 // nucleotide binding // inferred from electronic annotation /// 0003743 // translation initiation factor activity // inferred from electronic annotation /// 0003743 // translation initiation factor activity // inferred from sequence or structural similarity /// 0003924 // GTPase activity // inferred from electronic annotation /// 0005525 // GTP binding // inferred from electronic annotat…	6.06625	6.51799	6.24227	8.43382	8.23494	8.62514	7.47135	7.38509	6.77637	8.4313	6.2755	7.21094
1430996_at	ethanolamine kinase 1	Etnk1	99.2473	22.3694	4.43674	0.00464537	Yes	No	0006646 // phosphatidylethanolamine biosynthetic process // inferred from electronic annotation	0005737 // cytoplasm // inferred from electronic annotation	0004305 // ethanolamine kinase activity // inferred from electronic annotation /// 0016301 // kinase activity // inferred from electronic annotation /// 0016740 // transferase activity // inferred from electronic annotation	4.37075	4.62301	4.45661	6.37305	6.68637	6.83945	5.76357	5.56971	5.26865	6.63296	4.48346	5.53398
1423531_a_at	heterogeneous nuclear ribonucleoprotein A1	Hnrnpa1	1741.32	393.311	4.42734	0.00496477	Yes	No	0000380 // alternative nuclear mRNA splicing, via spliceosome // inferred from direct assay /// 0006397 // mRNA processing // inferred from electronic annotation /// 0006810 // transport // inferred from electronic annotation /// 0008380 // RNA splicing // inferred from direct assay /// 0008380 // RNA splicing // inferred from electronic annotation /// 0051028 // mRNA transport // inferred from e…	0005634 // nucleus // inferred from direct assay /// 0005634 // nucleus // inferred from electronic annotation /// 0005654 // nucleoplasm // inferred from sequence or structural similarity /// 0005681 // spliceosome // inferred from electronic annotation /// 0005681 // spliceosome // inferred from sequence or structural similarity /// 0005737 // cytoplasm // inferred from electronic annotation //…	0000166 // nucleotide binding // inferred from electronic annotation /// 0003676 // nucleic acid binding // inferred from electronic annotation /// 0003697 // single-stranded DNA binding // inferred from sequence or structural similarity /// 0003723 // RNA binding // inferred from electronic annotation	8.96167	8.49278	8.40413	10.8016	10.7894	10.7069	11.137	11.2078	9.85617	10.766	8.61953	10.7337
1420898_at	synaptosomal-associated protein 23	Snap23	283.733	64.2436	4.41652	0.00440516	Yes	No	0006810 // transport // inferred from electronic annotation /// 0015031 // protein transport // inferred from electronic annotation	0005792 // microsome // inferred from direct assay /// 0005886 // plasma membrane // inferred from electronic annotation /// 0016020 // membrane // inferred from electronic annotation /// 0019717 // synaptosome // inferred from electronic annotation /// 0030054 // cell junction // inferred from electronic annotation /// 0045202 // synapse // inferred from electronic annotation	0005515 // protein binding // inferred from physical interaction /// 0005515 // protein binding // inferred from electronic annotation	6.10326	5.95498	5.9582	8.41407	8.05441	7.97669	5.96852	5.92423	6.35305	8.14839	6.00548	6.08193
1434225_at	SWA-70 protein	Swap70	1432.98	326.545	4.3883	0.00260836	Yes	No	0016444 // somatic cell DNA recombination // inferred from direct assay /// 0045190 // isotype switching // inferred from direct assay	0005634 // nucleus // inferred from direct assay /// 0005634 // nucleus // inferred from electronic annotation /// 0005737 // cytoplasm // inferred from electronic annotation /// 0005886 // plasma membrane // inferred from electronic annotation /// 0016020 // membrane // inferred from electronic annotation /// 0042995 // cell projection // inferred from electronic annotation	0003677 // DNA binding // inferred from direct assay /// 0003677 // DNA binding // inferred from electronic annotation /// 0005515 // protein binding // inferred from physical interaction /// 0005524 // ATP binding // inferred from direct assay	8.46239	8.26426	8.32676	10.527	10.456	10.4714	11.1501	11.0395	10.8254	10.4848	8.35114	11.005
1436204_at	RIKEN cDNA 1110059G02 gene	1110059G02Rik	1326.19	302.458	4.38469	0.00430444	Yes	No	---	---	---	8.28211	8.00238	8.43729	10.4073	10.4199	10.292	9.37079	9.33426	8.1828	10.3731	8.24059	8.96262
1418565_at	Serpine1 mRNA binding protein 1	Serbp1	116.712	26.6384	4.38136	0.00497381	Yes	No	---	0005634 // nucleus // inferred from electronic annotation /// 0005737 // cytoplasm // inferred from electronic annotation	0003723 // RNA binding // inferred from electronic annotation /// 0003730 // mRNA 3'-UTR binding // inferred from sequence or structural similarity	4.77444	4.7209	4.71096	6.87193	7.1656	6.56291	6.60818	6.41823	6.01129	6.86681	4.73543	6.3459
1444437_at	ubiquitin specific peptidase 34	Usp34	98.3934	22.5071	4.37166	0.00430444	Yes	No	0006511 // ubiquitin-dependent protein catabolic process // inferred from electronic annotation	---	0004221 // ubiquitin thiolesterase activity // inferred from electronic annotation /// 0008233 // peptidase activity // inferred from electronic annotation /// 0008234 // cysteine-type peptidase activity // inferred from electronic annotation /// 0016787 // hydrolase activity // inferred from electronic annotation	4.57409	4.52921	4.37363	6.54384	6.85495	6.46268	6.11739	6.43142	6.31745	6.62049	4.49231	6.28875
1447640_s_at	pre B-cell leukemia transcription factor 3	Pbx3	160.141	36.7221	4.3609	0.00470066	Yes	No	0002087 // regulation of respiratory gaseous exchange by neurological process // inferred from mutant phenotype /// 0006350 // transcription // inferred from electronic annotation /// 0006355 // regulation of transcription, DNA-dependent // inferred from electronic annotation /// 0007585 // respiratory gaseous exchange // inferred from mutant phenotype /// 0008344 // adult locomotory behavior // …	0005634 // nucleus // inferred from direct assay /// 0005634 // nucleus // inferred from electronic annotation /// 0005667 // transcription factor complex // inferred from direct assay	0003677 // DNA binding // inferred from electronic annotation /// 0003700 // transcription factor activity // inferred from electronic annotation /// 0005515 // protein binding // inferred from physical interaction /// 0030528 // transcription regulator activity // inferred from electronic annotation /// 0043565 // sequence-specific DNA binding // inferred from direct assay /// 0043565 // sequenc…	5.18227	5.10767	5.30579	7.55243	7.38108	7.0361	6.13811	5.96756	6.54137	7.3232	5.19858	6.21568
1420916_at	PRP40 pre-mRNA processing factor 40 homolog A (yeast)	Prpf40a	359.776	82.609	4.35516	0.00256939	Yes	No	0006397 // mRNA processing // inferred from electronic annotation /// 0008380 // RNA splicing // inferred from electronic annotation	0005634 // nucleus // inferred from electronic annotation /// 0016607 // nuclear speck // inferred from electronic annotation	0005515 // protein binding // inferred from physical interaction /// 0005515 // protein binding // inferred from electronic annotation	6.34123	6.34745	6.416	8.44377	8.5927	8.43639	7.49368	7.32433	6.86622	8.49095	6.36823	7.22808
1454955_at	importin 7	Ipo7	837.025	192.228	4.35433	0.00248757	Yes	No	0000059 // protein import into nucleus, docking // inferred from electronic annotation /// 0006606 // protein import into nucleus // inferred from direct assay /// 0006810 // transport // inferred from electronic annotation /// 0006886 // intracellular protein transport // inferred from electronic annotation /// 0015031 // protein transport // inferred from electronic annotation	0005634 // nucleus // inferred from electronic annotation /// 0005643 // nuclear pore // inferred from electronic annotation /// 0005737 // cytoplasm // inferred from electronic annotation	0005488 // binding // inferred from electronic annotation /// 0005515 // protein binding // inferred from physical interaction /// 0005515 // protein binding // not recorded /// 0008565 // protein transporter activity // inferred from electronic annotation /// 0042393 // histone binding // inferred from direct assay	7.51896	7.57469	7.66638	9.74913	9.67543	9.70282	9.40331	9.71944	8.93841	9.70913	7.58668	9.35372
1452717_at	solute carrier family 25 (mitochondrial carrier, phosphate carrier), member 24	Slc25a24	1154.59	265.567	4.34765	0.00459075	Yes	No	0006810 // transport // inferred from electronic annotation /// 0006839 // mitochondrial transport // inferred from electronic annotation	0005739 // mitochondrion // inferred from electronic annotation /// 0005743 // mitochondrial inner membrane // inferred from electronic annotation /// 0016020 // membrane // inferred from electronic annotation /// 0016021 // integral to membrane // inferred from electronic annotation	0005488 // binding // inferred from electronic annotation /// 0005509 // calcium ion binding // inferred from electronic annotation	8.30993	7.86947	7.97939	10.185	10.0478	10.2867	9.00703	8.71366	9.10315	10.1732	8.05293	8.94128
1455698_at	SEC62 homolog (S. cerevisiae)	Sec62	182.998	42.487	4.30716	0.00440516	Yes	No	0006810 // transport // inferred from electronic annotation /// 0015031 // protein transport // inferred from electronic annotation /// 0065002 // intracellular protein transmembrane transport // inferred from electronic annotation	0005783 // endoplasmic reticulum // inferred from electronic annotation /// 0005789 // endoplasmic reticulum membrane // inferred from electronic annotation /// 0016020 // membrane // inferred from electronic annotation /// 0016021 // integral to membrane // inferred from electronic annotation	0008565 // protein transporter activity // inferred from electronic annotation	5.47491	5.19053	5.56141	7.52229	7.65344	7.37133	6.35668	6.35668	5.83529	7.51569	5.40895	6.18288
1423520_at	lamin B1	Lmnb1	410.323	95.5462	4.2945	0.00470066	Yes	No	---	0005634 // nucleus // inferred from direct assay /// 0005634 // nucleus // inferred from electronic annotation /// 0005637 // nuclear inner membrane // inferred from electronic annotation /// 0005638 // lamin filament // inferred from direct assay /// 0005882 // intermediate filament // inferred from electronic annotation /// 0016020 // membrane // inferred from electronic annotation	0005198 // structural molecule activity // inferred from electronic annotation	6.80161	6.43956	6.49321	8.90089	8.5115	8.62946	7.7615	7.57736	6.91113	8.68062	6.57813	7.41666
1440459_at	senataxin	Setx	130.634	30.5847	4.27121	0.00366513	Yes	No	0006281 // DNA repair // inferred from electronic annotation /// 0006302 // double-strand break repair // inferred from sequence or structural similarity /// 0006974 // response to DNA damage stimulus // inferred from electronic annotation	0005634 // nucleus // inferred from electronic annotation /// 0005634 // nucleus // inferred from sequence or structural similarity /// 0005654 // nucleoplasm // inferred from sequence or structural similarity /// 0005737 // cytoplasm // inferred from electronic annotation /// 0005737 // cytoplasm // inferred from sequence or structural similarity	0000166 // nucleotide binding // inferred from electronic annotation /// 0004386 // helicase activity // inferred from electronic annotation /// 0005524 // ATP binding // inferred from electronic annotation /// 0016787 // hydrolase activity // inferred from electronic annotation	4.9272	4.99252	4.8845	6.91379	6.99746	7.1769	5.53742	5.19622	5.29566	7.02938	4.93474	5.3431
1423744_x_at	eukaryotic translation initiation factor 2, subunit 3, structural gene X-linked	Eif2s3x	2073.28	488.906	4.24065	0.00459075	Yes	No	0006412 // translation // inferred from electronic annotation /// 0006413 // translational initiation // inferred from sequence or structural similarity	---	0000166 // nucleotide binding // inferred from electronic annotation /// 0003743 // translation initiation factor activity // inferred from electronic annotation /// 0003743 // translation initiation factor activity // inferred from sequence or structural similarity /// 0003924 // GTPase activity // inferred from electronic annotation /// 0005525 // GTP binding // inferred from electronic annotat…	9.19228	8.7559	8.85206	10.9012	11.0089	11.143	10.5255	10.4851	9.84691	11.0177	8.93341	10.2858
1421644_at	schlafen 3	Slfn3	47.5738	11.2373	4.23356	0.00293081	Yes	No	0008285 // negative regulation of cell proliferation // inferred from direct assay	---	0005524 // ATP binding // inferred from electronic annotation	3.45759	3.58847	3.42462	5.51042	5.54338	5.66249	4.51331	3.82815	4.40667	5.5721	3.49023	4.24938
1434242_at	ubiquitin specific peptidase 37	Usp37	363.588	86.1292	4.22142	0.00480678	Yes	No	0006511 // ubiquitin-dependent protein catabolic process // inferred from electronic annotation	---	0004221 // ubiquitin thiolesterase activity // inferred from electronic annotation /// 0008233 // peptidase activity // inferred from electronic annotation /// 0008234 // cysteine-type peptidase activity // inferred from electronic annotation /// 0016787 // hydrolase activity // inferred from electronic annotation	6.51681	6.60728	6.1612	8.51799	8.65629	8.3442	8.38806	8.58003	8.02338	8.50616	6.42843	8.33049
1434068_s_at	expressed sequence AI662270	AI662270	3038.48	726.685	4.18129	0.00414948	Yes	No	---	---	---	9.68051	9.35454	9.48051	11.6289	11.5817	11.4968	10.479	10.1628	9.66205	11.5691	9.50519	10.1013
1451122_at	isopentenyl-diphosphate delta isomerase	Idi1	1097.03	264.724	4.14407	0.00440516	Yes	No	0006694 // steroid biosynthetic process // inferred from electronic annotation /// 0006695 // cholesterol biosynthetic process // inferred from electronic annotation /// 0008299 // isoprenoid biosynthetic process // inferred from electronic annotation /// 0008610 // lipid biosynthetic process // inferred from electronic annotation /// 0016117 // carotenoid biosynthetic process // inferred from el…	0005777 // peroxisome // inferred from electronic annotation	0000287 // magnesium ion binding // inferred from electronic annotation /// 0004452 // isopentenyl-diphosphate delta-isomerase activity // inferred from electronic annotation /// 0016787 // hydrolase activity // inferred from electronic annotation /// 0016853 // isomerase activity // inferred from electronic annotation /// 0046872 // metal ion binding // inferred from electronic annotation	8.16646	7.93263	8.04595	10.2263	10.2049	9.86698	8.75073	8.71705	8.08994	10.0994	8.04835	8.51924
1450012_x_at	tyrosine 3-monooxygenase/tryptophan 5-monooxygenase activation protein, gamma po	Ywhag	1309.59	317.579	4.12367	0.0046807	Yes	No	0006605 // protein targeting // inferred from direct assay /// 0045664 // regulation of neuron differentiation // inferred from electronic annotation /// 0045664 // regulation of neuron differentiation // inferred from sequence or structural similarity /// 0048167 // regulation of synaptic plasticity // inferred from electronic annotation /// 0048167 // regulation of synaptic plasticity // inferr…	0005737 // cytoplasm // inferred from electronic annotation	0003779 // actin binding // inferred from sequence or structural similarity /// 0005080 // protein kinase C binding // inferred from electronic annotation /// 0005080 // protein kinase C binding // inferred from sequence or structural similarity /// 0005159 // insulin-like growth factor receptor binding // inferred from electronic annotation /// 0005159 // insulin-like growth factor receptor bind…	8.26983	8.16091	8.50217	10.1534	10.5561	10.3552	9.55007	9.21493	8.9361	10.3549	8.31097	9.2337
1442656_at	Myelination associated SUR4-like protein (Masr)	Elovl6	350.187	85.1676	4.11173	0.00440516	Yes	No	0006633 // fatty acid biosynthetic process // inferred from electronic annotation /// 0008610 // lipid biosynthetic process // inferred from electronic annotation /// 0030497 // fatty acid elongation // inferred from direct assay	0005739 // mitochondrion // inferred from electronic annotation /// 0005783 // endoplasmic reticulum // inferred from electronic annotation /// 0005789 // endoplasmic reticulum membrane // inferred from electronic annotation /// 0016020 // membrane // inferred from electronic annotation /// 0016021 // integral to membrane // inferred from electronic annotation /// 0030176 // integral to endoplasm…	0016747 // transferase activity, transferring acyl groups other than amino-acyl groups // inferred from direct assay	6.28953	6.65615	6.29102	8.53431	8.34713	8.4745	7.64768	7.90684	7.71314	8.45198	6.41223	7.75589
1455634_at	Son DNA binding protein	Son	735.494	178.934	4.11042	0.00468814	Yes	No	0006916 // anti-apoptosis // inferred from electronic annotation	0005622 // intracellular // inferred from electronic annotation /// 0005634 // nucleus // inferred from electronic annotation	0003676 // nucleic acid binding // inferred from electronic annotation /// 0003677 // DNA binding // inferred from electronic annotation /// 0003723 // RNA binding // inferred from electronic annotation /// 0003725 // double-stranded RNA binding // inferred from electronic annotation /// 0005515 // protein binding // inferred from physical interaction /// 0005515 // protein binding // inferred fr…	7.30128	7.43981	7.70876	9.43081	9.71676	9.42014	9.56045	9.69895	9.70262	9.52257	7.48328	9.65401
1439790_at	serine (or cysteine) peptidase inhibitor, clade B, member 9	Serpinb9	68.5632	16.7214	4.10032	0.00248757	Yes	No	0006916 // anti-apoptosis // inferred from direct assay	---	0004867 // serine-type endopeptidase inhibitor activity // inferred from electronic annotation /// 0005515 // protein binding // inferred from physical interaction	4.0313	4.06834	4.09124	6.14184	6.00631	6.14994	4.65459	4.42443	4.90236	6.09936	4.06363	4.66046
1426269_at	vesicle-associated membrane protein 7	Vamp7	469.768	114.776	4.09292	0.00459075	Yes	No	0006810 // transport // inferred from electronic annotation /// 0006887 // exocytosis // inferred from electronic annotation /// 0006888 // ER to Golgi vesicle-mediated transport // inferred from sequence or structural similarity /// 0006906 // vesicle fusion // inferred from sequence or structural similarity /// 0006911 // phagocytosis, engulfment // inferred from sequence or structural similari…	0005764 // lysosome // inferred from electronic annotation /// 0005765 // lysosomal membrane // inferred from sequence or structural similarity /// 0005765 // lysosomal membrane // inferred from electronic annotation /// 0005768 // endosome // inferred from electronic annotation /// 0005783 // endoplasmic reticulum // inferred from electronic annotation /// 0005789 // endoplasmic reticulum membra…	0005515 // protein binding // inferred from sequence or structural similarity	6.86697	6.58395	7.0771	8.8707	8.8446	8.91211	6.63419	6.20648	7.0565	8.8758	6.84267	6.63239
1416832_at	solute carrier family 39 (metal ion transporter), member 8	Slc39a8	105.261	25.7558	4.08691	0.00430444	Yes	No	0006810 // transport // inferred from electronic annotation /// 0006811 // ion transport // inferred from electronic annotation /// 0006829 // zinc ion transport // inferred from electronic annotation /// 0030001 // metal ion transport // inferred from electronic annotation	0016020 // membrane // inferred from electronic annotation /// 0016021 // integral to membrane // inferred from electronic annotation	0008270 // zinc ion binding // inferred from electronic annotation /// 0046873 // metal ion transmembrane transporter activity // inferred from electronic annotation	4.66838	4.55038	4.84171	6.88431	6.55503	6.71416	6.41407	5.98808	5.35894	6.71783	4.68682	5.92036
1433531_at	acyl-CoA synthetase long-chain family member 4	Acsl4	614.833	151.182	4.06684	0.0046807	Yes	No	0006629 // lipid metabolic process // inferred from electronic annotation /// 0006631 // fatty acid metabolic process // inferred from electronic annotation /// 0008152 // metabolic process // inferred from electronic annotation /// 0019217 // regulation of fatty acid metabolic process // traceable author statement	0005739 // mitochondrion // inferred from electronic annotation /// 0005741 // mitochondrial outer membrane // inferred from electronic annotation /// 0005777 // peroxisome // inferred from electronic annotation /// 0005778 // peroxisomal membrane // inferred from electronic annotation /// 0005783 // endoplasmic reticulum // inferred from electronic annotation /// 0005789 // endoplasmic reticulum…	0000287 // magnesium ion binding // inferred from electronic annotation /// 0003824 // catalytic activity // inferred from electronic annotation /// 0004467 // long-chain-fatty-acid-CoA ligase activity // not recorded /// 0004467 // long-chain-fatty-acid-CoA ligase activity // inferred from electronic annotation /// 0016874 // ligase activity // inferred from electronic annotation	7.42283	6.94685	7.35074	9.25431	9.30013	9.23771	8.95505	8.88572	8.66065	9.26405	7.24014	8.83381
1438855_x_at	tumor necrosis factor, alpha-induced protein 2	Tnfaip2	53.8375	13.3382	4.03634	0.00397645	Yes	No	0001525 // angiogenesis // inferred from electronic annotation /// 0007275 // multicellular organismal development // inferred from electronic annotation /// 0030154 // cell differentiation // inferred from electronic annotation	---	---	3.85242	3.78729	3.57277	5.78194	5.74897	5.72071	6.59166	5.62146	6.06273	5.75054	3.73749	6.09195
1437747_at	ubiquitination factor E4A, UFD2 homolog (S. cerevisiae)	Ube4a	245.961	61.0742	4.02725	0.00366513	Yes	No	0000209 // protein polyubiquitination // inferred from direct assay /// 0016567 // protein ubiquitination // inferred from electronic annotation	0000151 // ubiquitin ligase complex // inferred from electronic annotation /// 0005737 // cytoplasm // inferred from direct assay	0004842 // ubiquitin-protein ligase activity // inferred from direct assay /// 0004842 // ubiquitin-protein ligase activity // inferred from electronic annotation /// 0034450 // ubiquitin-ubiquitin ligase activity // inferred from direct assay	5.94236	5.90041	5.9547	8.05435	7.97945	7.79305	7.65616	7.52692	7.43449	7.94228	5.93249	7.53919
1434468_at	OTU domain containing 4	Otud4	1969.21	491.341	4.00783	0.00397645	Yes	No	---	---	---	8.94679	8.97231	8.90264	10.8127	11.1135	10.904	11.044	11.1777	10.5561	10.9434	8.94058	10.9259
1418656_at	LSM5 homolog, U6 small nuclear RNA associated (S. cerevisiae)	Lsm5	1046.9	262.012	3.9956	0.00440516	Yes	No	0006397 // mRNA processing // inferred from electronic annotation /// 0006402 // mRNA catabolic process // not recorded /// 0008380 // RNA splicing // inferred from electronic annotation	0005634 // nucleus // inferred from electronic annotation /// 0005737 // cytoplasm // not recorded /// 0030529 // ribonucleoprotein complex // inferred from electronic annotation	0003723 // RNA binding // inferred from electronic annotation /// 0005515 // protein binding // inferred from physical interaction /// 0046982 // protein heterodimerization activity // not recorded	8.07784	7.88741	8.13522	9.93016	10.2498	9.91575	8.66524	8.47932	8.51354	10.0319	8.03349	8.5527
1460431_at	glucosaminyl (N-acetyl) transferase 1, core 2	Gcnt1	75.554	18.9621	3.98447	0.00430444	Yes	No	---	0000139 // Golgi membrane // inferred from electronic annotation /// 0005794 // Golgi apparatus // inferred from electronic annotation /// 0016020 // membrane // inferred from electronic annotation /// 0016021 // integral to membrane // inferred from electronic annotation	0003829 // beta-1,3-galactosyl-O-glycosyl-glycoprotein beta-1,6-N-acetylglucosaminyltransferase activity // inferred from electronic annotation /// 0008375 // acetylglucosaminyltransferase activity // inferred from electronic annotation /// 0016740 // transferase activity // inferred from electronic annotation /// 0016757 // transferase activity, transferring glycosyl groups // inferred from elec…	4.26305	4.32153	4.15057	6.39902	6.03593	6.28336	6.8538	6.31511	6.30556	6.23944	4.24505	6.49149
1451064_a_at	phosphoserine aminotransferase 1	Psat1	999.667	250.909	3.98418	0.00446687	Yes	No	0006564 // L-serine biosynthetic process // inferred from electronic annotation /// 0008152 // metabolic process // inferred from electronic annotation /// 0008652 // amino acid biosynthetic process // inferred from electronic annotation	---	0003824 // catalytic activity // inferred from electronic annotation /// 0004648 // phosphoserine transaminase activity // inferred from electronic annotation /// 0008483 // transaminase activity // inferred from electronic annotation /// 0016740 // transferase activity // inferred from electronic annotation /// 0030170 // pyridoxal phosphate binding // inferred from electronic annotation	7.96764	7.80777	8.13765	10.1598	9.88683	9.84928	9.07017	8.75073	8.84767	9.9653	7.97102	8.88952
1439487_at	ligase IV, DNA, ATP-dependent	Lig4	220.529	55.4238	3.97896	0.00459075	Yes	No	0000012 // single strand break repair // inferred from electronic annotation /// 0001701 // in utero embryonic development // inferred from mutant phenotype /// 0002328 // pro-B cell differentiation // inferred from mutant phenotype /// 0006260 // DNA replication // inferred from electronic annotation /// 0006266 // DNA ligation // inferred from direct assay /// 0006266 // DNA ligation // inferre…	0000793 // condensed chromosome // inferred from electronic annotation /// 0005622 // intracellular // inferred from electronic annotation /// 0005634 // nucleus // inferred from electronic annotation /// 0005958 // DNA-dependent protein kinase complex // inferred from direct assay /// 0005958 // DNA-dependent protein kinase complex // not recorded /// 0032807 // DNA ligase IV complex // inferred…	0000166 // nucleotide binding // inferred from electronic annotation /// 0003677 // DNA binding // inferred from electronic annotation /// 0003910 // DNA ligase (ATP) activity // inferred from direct assay /// 0003910 // DNA ligase (ATP) activity // inferred from electronic annotation /// 0005515 // protein binding // not recorded /// 0005524 // ATP binding // inferred from direct assay /// 00055…	5.99019	5.66416	5.72295	7.7059	7.98886	7.65971	7.06828	7.08829	6.38188	7.78482	5.79243	6.84615
1416034_at	CD24a antigen /// predicted gene, EG621324	Cd24a /// EG621324	218.527	55.3061	3.95123	0.00497381	Yes	No	0001666 // response to hypoxia // inferred from sequence or structural similarity /// 0001666 // response to hypoxia // inferred from electronic annotation /// 0001775 // cell activation // inferred from sequence or structural similarity /// 0001775 // cell activation // inferred from electronic annotation /// 0001959 // regulation of cytokine mediated signaling pathway // inferred from mutant ph…	0005624 // membrane fraction // inferred from direct assay /// 0005886 // plasma membrane // inferred from direct assay /// 0005886 // plasma membrane // inferred from electronic annotation /// 0009897 // external side of plasma membrane // inferred from direct assay /// 0009897 // external side of plasma membrane // not recorded /// 0009897 // external side of plasma membrane // inferred from el…	0005515 // protein binding // inferred from sequence or structural similarity /// 0005515 // protein binding // inferred from electronic annotation /// 0019901 // protein kinase binding // inferred from sequence or structural similarity /// 0019901 // protein kinase binding // inferred from electronic annotation /// 0030246 // carbohydrate binding // inferred from direct assay /// 0030296 // prot…	5.69802	5.77484	5.89524	7.63768	8.07553	7.6018	8.60635	7.88772	7.71081	7.77167	5.78937	8.06829
1433571_at	serine incorporator 5	Serinc5	313.239	79.5436	3.93796	0.00293081	Yes	No	0006629 // lipid metabolic process // inferred from electronic annotation /// 0006658 // phosphatidylserine metabolic process // inferred from electronic annotation /// 0006658 // phosphatidylserine metabolic process // inferred from sequence or structural similarity /// 0008654 // phospholipid biosynthetic process // inferred from electronic annotation /// 0042552 // myelination // inferred from…	0005783 // endoplasmic reticulum // inferred from electronic annotation /// 0005789 // endoplasmic reticulum membrane // inferred from electronic annotation /// 0005794 // Golgi apparatus // inferred from direct assay /// 0016020 // membrane // inferred from electronic annotation /// 0016021 // integral to membrane // inferred from electronic annotation /// 0043209 // myelin sheath // inferred fr…	0009055 // electron carrier activity // inferred from electronic annotation	6.21494	6.41909	6.30699	8.24973	8.34541	8.27822	7.28719	7.15336	6.95163	8.29112	6.31367	7.13073
1448958_at	interferon alpha responsive gene	Ifrg15	317.55	80.9833	3.92118	0.0046807	Yes	No	---	---	---	6.43981	6.09286	6.48599	8.31202	8.17836	8.44214	7.34015	7.25389	6.74887	8.31084	6.33955	7.1143
1434076_at	WD repeat domain 37	Wdr37	1396.92	358.577	3.89573	0.00414948	Yes	No	---	---	---	8.5813	8.43246	8.44466	10.6065	10.3531	10.3845	9.85297	9.63467	9.64354	10.448	8.48614	9.71039
1424202_at	SEH1-like (S. cerevisiae	Seh1l	513.379	132.634	3.87063	0.00434304	Yes	No	---	---	---	6.80894	7.22178	7.12321	9.0278	8.98001	9.00383	8.05424	7.86441	8.05424	9.00388	7.05131	7.99096
1415975_at	calcium regulated heat stable protein 1	Carhsp1	339.629	87.8277	3.867	0.0046807	Yes	No	0006355 // regulation of transcription, DNA-dependent // inferred from electronic annotation	0005737 // cytoplasm // inferred from electronic annotation	0003676 // nucleic acid binding // inferred from electronic annotation /// 0003677 // DNA binding // inferred from electronic annotation /// 0005515 // protein binding // inferred from physical interaction	6.4691	6.29571	6.605	8.41295	8.20965	8.60085	7.17971	6.67978	6.71061	8.40782	6.4566	6.8567
1452059_at	solute carrier family 35, member F5	Slc35f5	87.1299	22.6522	3.84642	0.00459075	Yes	No	0006810 // transport // inferred from electronic annotation	0016020 // membrane // inferred from electronic annotation /// 0016021 // integral to membrane // inferred from electronic annotation	---	4.32559	4.61707	4.56208	6.61899	6.26624	6.45006	5.42871	5.42871	5.12672	6.4451	4.50158	5.32805
1423795_at	splicing factor proline/glutamine rich (polypyrimidine tract binding protein ass	Sfpq	2270.61	591.854	3.83644	0.00459075	Yes	No	0006281 // DNA repair // inferred from electronic annotation /// 0006350 // transcription // inferred from electronic annotation /// 0006355 // regulation of transcription, DNA-dependent // inferred from electronic annotation /// 0006397 // mRNA processing // inferred from electronic annotation /// 0006974 // response to DNA damage stimulus // inferred from electronic annotation /// 0008380 // RN…	0005634 // nucleus // inferred from electronic annotation /// 0016363 // nuclear matrix // inferred from electronic annotation	0000166 // nucleotide binding // inferred from electronic annotation /// 0003676 // nucleic acid binding // inferred from electronic annotation /// 0003677 // DNA binding // inferred from electronic annotation /// 0003723 // RNA binding // inferred from electronic annotation /// 0005515 // protein binding // inferred from electronic annotation	9.03593	9.33089	9.26047	10.9682	11.3251	11.1533	11.2561	11.3457	10.5065	11.1489	9.2091	11.0361
1455059_at	helicase with zinc finger domain	Helz	166.643	43.5036	3.83056	0.00417426	Yes	No	---	0005634 // nucleus // inferred from electronic annotation	0000166 // nucleotide binding // inferred from electronic annotation /// 0003676 // nucleic acid binding // inferred from electronic annotation /// 0004386 // helicase activity // inferred from electronic annotation /// 0005524 // ATP binding // inferred from electronic annotation /// 0008270 // zinc ion binding // inferred from electronic annotation /// 0016787 // hydrolase activity // inferred …	5.39889	5.47848	5.45182	7.39563	7.54235	7.20388	7.39355	7.29454	7.12375	7.38062	5.44306	7.27061
1443733_x_at	polymerase (DNA-directed), delta 3, accessory subunit	Pold3	173.928	45.4367	3.82791	0.00424039	Yes	No	0006260 // DNA replication // inferred from electronic annotation	0005634 // nucleus // inferred from electronic annotation	0003887 // DNA-directed DNA polymerase activity // inferred from electronic annotation /// 0016740 // transferase activity // inferred from electronic annotation /// 0016779 // nucleotidyltransferase activity // inferred from electronic annotation	5.48302	5.36802	5.66632	7.50141	7.50536	7.32026	7.38205	7.20938	6.50108	7.44234	5.50579	7.03084
1423445_at	Rho-associated coiled-coil containing protein kinase 1	Rock1	994.164	259.897	3.82522	0.00430444	Yes	No	0000910 // cytokinesis // inferred from electronic annotation /// 0006468 // protein amino acid phosphorylation // inferred from electronic annotation /// 0006915 // apoptosis // inferred from electronic annotation /// 0007165 // signal transduction // inferred from electronic annotation /// 0007242 // intracellular signaling cascade // inferred from electronic annotation /// 0022614 // membrane …	0000139 // Golgi membrane // inferred from electronic annotation /// 0005622 // intracellular // inferred from electronic annotation /// 0005737 // cytoplasm // inferred from electronic annotation /// 0005794 // Golgi apparatus // inferred from electronic annotation /// 0016020 // membrane // inferred from electronic annotation	0000166 // nucleotide binding // inferred from electronic annotation /// 0004672 // protein kinase activity // inferred from electronic annotation /// 0004674 // protein serine/threonine kinase activity // inferred from electronic annotation /// 0005515 // protein binding // inferred from electronic annotation /// 0005515 // protein binding // inferred from physical interaction /// 0005524 // ATP…	8.08704	7.95484	8.02351	9.74782	10.0332	10.091	9.86904	9.72975	9.59812	9.95734	8.0218	9.7323
1435081_at	synaptophysin-like protein	Sypl	339.73	89.3558	3.802	0.00417426	Yes	No	0006810 // transport // inferred from electronic annotation	0008021 // synaptic vesicle // inferred from electronic annotation /// 0016020 // membrane // inferred from direct assay /// 0016020 // membrane // inferred from electronic annotation /// 0016021 // integral to membrane // inferred from electronic annotation /// 0030141 // secretory granule // inferred from direct assay /// 0030659 // cytoplasmic vesicle membrane // inferred from electronic annot…	0005215 // transporter activity // inferred from electronic annotation	6.58237	6.40228	6.45982	8.2377	8.48181	8.50523	7.96357	8.14204	7.98837	8.40825	6.48149	8.03133
1434079_s_at	minichromosome maintenance deficient 2 mitotin (S. cerevisiae)	Mcm2	1842.52	487.273	3.78129	0.00459075	Yes	No	0006260 // DNA replication // inferred from electronic annotation /// 0006268 // DNA unwinding during replication // inferred from direct assay /// 0006270 // DNA replication initiation // traceable author statement /// 0006270 // DNA replication initiation // inferred from electronic annotation /// 0006334 // nucleosome assembly // inferred from direct assay /// 0006350 // transcription // infer…	0005634 // nucleus // inferred from direct assay /// 0005634 // nucleus // inferred from electronic annotation /// 0005664 // nuclear origin of replication recognition complex // inferred from direct assay	0000166 // nucleotide binding // inferred from electronic annotation /// 0003677 // DNA binding // inferred from electronic annotation /// 0003688 // DNA replication origin binding // inferred from direct assay /// 0005515 // protein binding // inferred from physical interaction /// 0005515 // protein binding // inferred from electronic annotation /// 0005524 // ATP binding // inferred from elect…	9.05596	8.66348	9.06632	10.8908	10.8133	10.8383	10.3066	9.75634	10.4245	10.8475	8.92859	10.1625
1418399_at	potassium channel tetramerisation domain containing 9	Kctd9	169.389	45.013	3.76311	0.00417426	Yes	No	0006813 // potassium ion transport // inferred from electronic annotation	0008076 // voltage-gated potassium channel complex // inferred from electronic annotation /// 0016020 // membrane // inferred from electronic annotation	0005249 // voltage-gated potassium channel activity // inferred from electronic annotation /// 0005515 // protein binding // inferred from electronic annotation	5.65432	5.35856	5.46393	7.37758	7.34314	7.49187	7.22978	7.11835	6.8538	7.4042	5.49227	7.06731
1424343_a_at	eukaryotic translation initiation factor 1A	Eif1a	607.851	161.798	3.75684	0.00470066	Yes	No	0006412 // translation // inferred from electronic annotation /// 0006413 // translational initiation // inferred from electronic annotation	---	0003723 // RNA binding // inferred from electronic annotation /// 0003743 // translation initiation factor activity // inferred from electronic annotation	7.30794	7.11355	7.59267	9.32749	9.24747	9.16776	7.77218	7.55372	7.62838	9.24757	7.33805	7.65143
1421188_at	chemokine (C-C motif) receptor 2	Ccr2	162.787	43.3549	3.75476	0.00486734	Yes	No	0006954 // inflammatory response // inferred from mutant phenotype /// 0006955 // immune response // inferred from mutant phenotype /// 0006959 // humoral immune response // inferred from mutant phenotype /// 0006968 // cellular defense response // inferred from mutant phenotype /// 0007165 // signal transduction // inferred from electronic annotation /// 0007186 // G-protein coupled receptor pro…	0005886 // plasma membrane // not recorded /// 0005886 // plasma membrane // inferred from electronic annotation /// 0016020 // membrane // inferred from electronic annotation /// 0016021 // integral to membrane // inferred from electronic annotation	0004871 // signal transducer activity // inferred from electronic annotation /// 0004872 // receptor activity // inferred from electronic annotation /// 0004930 // G-protein coupled receptor activity // inferred from electronic annotation /// 0005515 // protein binding // inferred from physical interaction /// 0005515 // protein binding // not recorded /// 0016493 // C-C chemokine receptor activi…	5.70739	5.25311	5.35387	7.25706	7.31493	7.46854	6.1554	5.80681	5.82865	7.34684	5.43812	5.93029
1416011_x_at	EH-domain containing 1	Ehd1	391.292	104.531	3.74332	0.0045228	Yes	No	0006897 // endocytosis // inferred from direct assay /// 0016197 // endosome transport // inferred from direct assay	0005768 // endosome // inferred from direct assay /// 0005768 // endosome // inferred from electronic annotation /// 0005769 // early endosome // inferred from direct assay /// 0005886 // plasma membrane // inferred from direct assay /// 0005886 // plasma membrane // inferred from electronic annotation /// 0016020 // membrane // inferred from electronic annotation /// 0030139 // endocytic vesicle…	0000166 // nucleotide binding // inferred from electronic annotation /// 0003924 // GTPase activity // inferred from electronic annotation /// 0005509 // calcium ion binding // inferred from electronic annotation /// 0005515 // protein binding // inferred from physical interaction /// 0005515 // protein binding // inferred from electronic annotation /// 0005524 // ATP binding // inferred from ele…	6.75245	6.54166	6.82924	8.79683	8.45952	8.57996	7.80107	7.40196	7.22207	8.6121	6.70778	7.47503
1416556_at	tetraspanin 31	Tspan31	1356.65	363.267	3.73458	0.0046807	Yes	No	---	0016020 // membrane // inferred from electronic annotation /// 0016021 // integral to membrane // inferred from electronic annotation	---	8.71043	8.23891	8.56532	10.3971	10.4426	10.3778	9.30207	8.9588	8.91059	10.4058	8.50489	9.05715
1422946_a_at	DNA methyltransferase (cytosine-5) 1	Dnmt1	1679.52	450.322	3.7296	0.00397645	Yes	No	0006306 // DNA methylation // inferred from direct assay /// 0006306 // DNA methylation // inferred from electronic annotation /// 0006350 // transcription // inferred from electronic annotation /// 0006355 // regulation of transcription, DNA-dependent // inferred from electronic annotation /// 0010468 // regulation of gene expression // inferred from mutant phenotype /// 0016458 // gene silencin…	0000792 // heterochromatin // inferred from direct assay /// 0005634 // nucleus // inferred from direct assay /// 0005634 // nucleus // inferred from electronic annotation /// 0005657 // replication fork // inferred from direct assay /// 0005737 // cytoplasm // inferred from electronic annotation	0003677 // DNA binding // inferred from direct assay /// 0003677 // DNA binding // inferred from electronic annotation /// 0003824 // catalytic activity // inferred from electronic annotation /// 0003886 // DNA (cytosine-5-)-methyltransferase activity // inferred from direct assay /// 0003886 // DNA (cytosine-5-)-methyltransferase activity // inferred from electronic annotation /// 0005515 // pro…	8.81475	8.85301	8.77668	10.7465	10.8294	10.5656	10.1694	10.0064	9.66411	10.7138	8.81481	9.94664
1438814_at	---	---	1772.91	475.734	3.72668	0.00320227	Yes	No	---	---	---	8.96678	8.82275	8.8925	10.6884	10.8799	10.8074	11.4452	12.1171	10.8819	10.7919	8.89401	11.4814
1433897_at	expressed sequence AI597468	AI597468	861.078	231.497	3.71962	0.00320227	Yes	No	---	0016020 // membrane // inferred from electronic annotation /// 0016021 // integral to membrane // inferred from electronic annotation	---	7.8945	7.94217	7.72787	9.74373	9.80154	9.70473	8.71383	8.3768	8.47945	9.75	7.85485	8.52336
1431320_a_at	myosin Va	Myo5a	215.466	58.4687	3.68515	0.00440516	Yes	No	0006582 // melanin metabolic process // inferred from mutant phenotype /// 0006887 // exocytosis // inferred from mutant phenotype /// 0007268 // synaptic transmission // inferred from mutant phenotype /// 0007601 // visual perception // inferred from mutant phenotype /// 0030048 // actin filament-based movement // inferred from direct assay /// 0030050 // vesicle transport along actin filament /…	0001750 // photoreceptor outer segment // inferred from direct assay /// 0005737 // cytoplasm // inferred from direct assay /// 0005794 // Golgi apparatus // inferred from direct assay /// 0005882 // intermediate filament // inferred from direct assay /// 0016459 // myosin complex // inferred from direct assay /// 0016459 // myosin complex // inferred from electronic annotation /// 0030141 // sec…	0000146 // microfilament motor activity // inferred from direct assay /// 0000166 // nucleotide binding // inferred from electronic annotation /// 0003774 // motor activity // inferred from direct assay /// 0003774 // motor activity // inferred from electronic annotation /// 0003779 // actin binding // inferred from direct assay /// 0003779 // actin binding // inferred from physical interaction /…	5.92102	5.97521	5.71255	7.79278	7.8876	7.57357	7.25913	7.17106	7.53477	7.75132	5.86959	7.32165
1438578_a_at	BTB (POZ) domain containing 10 /// similar to BTB (POZ) domain containing 10	Btbd10 /// LOC100047893	652.286	177.754	3.6696	0.00486386	Yes	No	0006813 // potassium ion transport // inferred from electronic annotation	0005634 // nucleus // inferred from electronic annotation /// 0008076 // voltage-gated potassium channel complex // inferred from electronic annotation /// 0016020 // membrane // inferred from electronic annotation	0005249 // voltage-gated potassium channel activity // inferred from electronic annotation /// 0005515 // protein binding // inferred from electronic annotation	7.50384	7.30971	7.60766	9.58957	9.21643	9.24208	9.52398	9.47489	8.76357	9.34936	7.47374	9.25415
1423207_at	transmembrane protein 167	Tmem167	346.835	94.6585	3.66407	0.00366513	Yes	No	---	0016020 // membrane // inferred from electronic annotation /// 0016021 // integral to membrane // inferred from electronic annotation	---	6.4739	6.64029	6.57979	8.55078	8.40439	8.35915	7.56143	7.55405	7.25638	8.43811	6.56466	7.45729
1425186_at	LMBR1 domain containing 1	Lmbrd1	111.598	30.5233	3.65615	0.00446103	Yes	No	---	0016020 // membrane // inferred from electronic annotation /// 0016021 // integral to membrane // inferred from electronic annotation	---	4.71379	5.02612	5.05561	6.86397	6.8672	6.67532	5.85216	5.84319	5.6046	6.80216	4.93184	5.76665
1454671_at	insulin induced gene 1	Insig1	347.49	95.2321	3.64887	0.00470066	Yes	No	0006629 // lipid metabolic process // inferred from electronic annotation /// 0006991 // response to sterol depletion // inferred from direct assay /// 0008202 // steroid metabolic process // inferred from electronic annotation /// 0008203 // cholesterol metabolic process // inferred from electronic annotation	0005783 // endoplasmic reticulum // traceable author statement /// 0005783 // endoplasmic reticulum // inferred from electronic annotation /// 0005789 // endoplasmic reticulum membrane // inferred from electronic annotation /// 0016020 // membrane // inferred from electronic annotation /// 0016021 // integral to membrane // inferred from electronic annotation	0005515 // protein binding // inferred from physical interaction	6.82259	6.37691	6.52063	8.35146	8.53712	8.4339	8.75692	8.75924	7.78224	8.44083	6.57338	8.4328
1426914_at	MARVEL (membrane-associating) domain containing 2	Marveld2	68.786	18.8895	3.6415	0.00492234	Yes	No	---	0005886 // plasma membrane // inferred from electronic annotation /// 0005923 // tight junction // inferred from electronic annotation /// 0016020 // membrane // inferred from electronic annotation /// 0016021 // integral to membrane // inferred from electronic annotation /// 0030054 // cell junction // inferred from electronic annotation	---	4.17519	4.29111	4.25223	6.02187	6.38729	5.90297	5.99767	5.72924	5.4821	6.10404	4.23951	5.73634
1460536_at	RIKEN cDNA 2310079F09 gene	2310079F09Rik	531.527	146.371	3.63137	0.00476976	Yes	No	---	---	---	7.12901	6.98665	7.4648	9.02135	9.02135	9.1193	9.52405	9.61033	9.16525	9.054	7.19349	9.43321
1452655_at	zinc finger, DHHC domain containing 2	Zdhhc2	268.999	74.4536	3.61297	0.00430444	Yes	No	0018345 // protein palmitoylation // inferred from direct assay	0016020 // membrane // inferred from electronic annotation /// 0016021 // integral to membrane // inferred from electronic annotation	0008270 // zinc ion binding // inferred from electronic annotation /// 0008415 // acyltransferase activity // inferred from electronic annotation /// 0016409 // palmitoyltransferase activity // inferred from direct assay /// 0016740 // transferase activity // inferred from electronic annotation /// 0046872 // metal ion binding // inferred from electronic annotation	6.25863	6.08522	6.31096	8.22675	8.06347	7.92415	6.52847	6.4233	6.60893	8.07146	6.21827	6.52023
1438951_x_at	nucleoporin 54	Nup54	487.638	135.092	3.60968	0.00430444	Yes	No	0006605 // protein targeting // inferred from electronic annotation /// 0006810 // transport // inferred from electronic annotation /// 0006913 // nucleocytoplasmic transport // inferred from electronic annotation /// 0015031 // protein transport // inferred from electronic annotation /// 0051028 // mRNA transport // inferred from electronic annotation /// 0065002 // intracellular protein transme…	0005634 // nucleus // inferred from electronic annotation /// 0005643 // nuclear pore // inferred from electronic annotation /// 0016020 // membrane // inferred from electronic annotation /// 0031965 // nuclear membrane // inferred from electronic annotation	0005487 // nucleocytoplasmic transporter activity // inferred from electronic annotation /// 0005515 // protein binding // inferred from electronic annotation	6.90493	7.05854	7.26992	8.89299	8.99235	8.90366	8.52374	8.41704	8.47315	8.92967	7.0778	8.47131
1423369_at	fragile X mental retardation syndrome 1 homolog	Fmr1	726.558	201.326	3.60887	0.00430444	Yes	No	0006810 // transport // inferred from electronic annotation /// 0007417 // central nervous system development // inferred from mutant phenotype /// 0051028 // mRNA transport // inferred from electronic annotation	0005634 // nucleus // inferred from direct assay /// 0005634 // nucleus // inferred from electronic annotation /// 0005737 // cytoplasm // inferred from electronic annotation	0003723 // RNA binding // inferred from electronic annotation /// 0005515 // protein binding // inferred from physical interaction /// 0005515 // protein binding // inferred from electronic annotation	7.6905	7.77115	7.49851	9.58172	9.58807	9.34501	8.73808	8.22039	8.40005	9.50493	7.65339	8.45284
1423885_at	laminin, gamma 1	Lamc1	374.055	103.769	3.6047	0.00470066	Yes	No	0006461 // protein complex assembly // inferred from electronic annotation /// 0006461 // protein complex assembly // inferred from sequence or structural similarity /// 0007155 // cell adhesion // inferred from electronic annotation /// 0007155 // cell adhesion // inferred from sequence or structural similarity /// 0016477 // cell migration // inferred from electronic annotation /// 0016477 // c…	0005576 // extracellular region // inferred from electronic annotation /// 0005578 // proteinaceous extracellular matrix // inferred from electronic annotation /// 0005604 // basement membrane // inferred from direct assay /// 0005604 // basement membrane // inferred from electronic annotation /// 0005604 // basement membrane // inferred from sequence or structural similarity /// 0005605 // basal…	0005201 // extracellular matrix structural constituent // inferred from electronic annotation /// 0005201 // extracellular matrix structural constituent // inferred from sequence or structural similarity /// 0005515 // protein binding // inferred from physical interaction /// 0005515 // protein binding // inferred from electronic annotation	6.75158	6.50693	6.83317	8.49746	8.40065	8.74321	7.7683	7.59421	7.79685	8.54711	6.69723	7.71979
1427098_at	WW domain containing E3 ubiquitin protein ligase 1	Wwp1	116.237	32.2979	3.59892	0.0049604	Yes	No	0006464 // protein modification process // inferred from electronic annotation /// 0006511 // ubiquitin-dependent protein catabolic process // inferred from electronic annotation /// 0016481 // negative regulation of transcription // inferred from direct assay /// 0016567 // protein ubiquitination // traceable author statement /// 0030217 // T cell differentiation // traceable author statement //…	0005622 // intracellular // inferred from electronic annotation	0004842 // ubiquitin-protein ligase activity // traceable author statement /// 0005515 // protein binding // inferred from physical interaction /// 0005515 // protein binding // inferred from electronic annotation /// 0005515 // protein binding // inferred from sequence or structural similarity /// 0016874 // ligase activity // inferred from electronic annotation /// 0016881 // acid-amino acid li…	5.013	4.7575	5.2696	6.87266	6.81098	6.89915	6.58551	6.34903	6.28416	6.86093	5.01337	6.40623
1416873_a_at	cyclin-dependent kinase 2	Cdk2	555.409	154.415	3.59686	0.00453208	Yes	No	0006468 // protein amino acid phosphorylation // inferred from direct assay /// 0006468 // protein amino acid phosphorylation // inferred from electronic annotation /// 0006813 // potassium ion transport // inferred from genetic interaction /// 0007049 // cell cycle // inferred from direct assay /// 0007049 // cell cycle // inferred from electronic annotation /// 0007067 // mitosis // inferred fr…	0000307 // cyclin-dependent protein kinase holoenzyme complex // inferred from physical interaction /// 0000307 // cyclin-dependent protein kinase holoenzyme complex // inferred from electronic annotation /// 0000781 // chromosome, telomeric region // inferred from direct assay /// 0000793 // condensed chromosome // inferred from direct assay /// 0000805 // X chromosome // inferred from direct as…	0000166 // nucleotide binding // inferred from electronic annotation /// 0004672 // protein kinase activity // inferred from electronic annotation /// 0004674 // protein serine/threonine kinase activity // inferred from electronic annotation /// 0004693 // cyclin-dependent protein kinase activity // inferred from direct assay /// 0004693 // cyclin-dependent protein kinase activity // inferred fro…	7.32937	7.452	7.03064	9.16026	9.08606	9.1059	8.78655	8.49154	8.55241	9.11741	7.27067	8.61017
1455278_at	WD repeat domain 37	Wdr37	219.649	61.3246	3.58175	0.00476976	Yes	No	---	---	---	6.00036	5.66636	6.14846	7.76665	7.76995	7.80057	6.96314	6.96314	6.87469	7.77906	5.93839	6.93366
1417398_at	related RAS viral (r-ras) oncogene homolog 2	Rras2	947.711	265.8	3.56551	0.00476976	Yes	No	0007264 // small GTPase mediated signal transduction // inferred from electronic annotation /// 0007265 // Ras protein signal transduction // inferred from direct assay /// 0009987 // cellular process // inferred from direct assay /// 0009987 // cellular process // inferred from physical interaction /// 0030335 // positive regulation of cell migration // inferred from genetic interaction	0005622 // intracellular // inferred from direct assay /// 0005622 // intracellular // inferred from electronic annotation /// 0005886 // plasma membrane // inferred from electronic annotation /// 0016020 // membrane // inferred from electronic annotation	0000166 // nucleotide binding // inferred from electronic annotation /// 0005515 // protein binding // inferred from physical interaction /// 0005515 // protein binding // inferred from electronic annotation /// 0005525 // GTP binding // inferred from electronic annotation	8.16226	7.79061	8.20972	9.95069	9.78849	9.92573	7.86441	7.84336	7.65266	9.8883	8.0542	7.78681
1429775_a_at	G protein-coupled receptor 137B /// G protein-coupled receptor 137B, pseudogene	Gpr137b /// Gpr137b-ps /// LOC100044979	255.455	71.7523	3.56024	0.00492234	Yes	No	---	0016020 // membrane // inferred from electronic annotation /// 0016021 // integral to membrane // inferred from electronic annotation	---	6.37682	6.04865	6.06939	7.80475	8.03714	8.14889	7.13181	6.86062	6.80884	7.99693	6.16495	6.93376
1450028_a_at	LanC (bacterial lantibiotic synthetase component C)-like 2 /// similar to testis	Lancl2 /// LOC100045439	282.199	79.9655	3.52901	0.00459075	Yes	No	0016481 // negative regulation of transcription // inferred from electronic annotation /// 0016481 // negative regulation of transcription // inferred from sequence or structural similarity	0005634 // nucleus // inferred from electronic annotation /// 0005634 // nucleus // inferred from sequence or structural similarity /// 0005737 // cytoplasm // inferred from electronic annotation /// 0005829 // cytosol // inferred from electronic annotation /// 0005829 // cytosol // inferred from sequence or structural similarity /// 0005886 // plasma membrane // inferred from electronic annotati…	0003824 // catalytic activity // inferred from electronic annotation	6.32912	6.18054	6.45426	8.23298	7.94277	8.24596	6.71976	6.35816	6.63538	8.14057	6.32131	6.5711
1436400_at	fragile X mental retardation gene 1, autosomal homolog	Fxr1	127.845	36.4199	3.51031	0.00430444	Yes	No	0007275 // multicellular organismal development // inferred from electronic annotation /// 0007517 // muscle development // inferred from mutant phenotype /// 0007519 // skeletal muscle development // inferred from electronic annotation /// 0030154 // cell differentiation // inferred from electronic annotation	0005737 // cytoplasm // inferred from electronic annotation /// 0043034 // costamere // inferred from direct assay	0003723 // RNA binding // inferred from electronic annotation /// 0005515 // protein binding // inferred from physical interaction	5.232	5.01416	5.3138	6.93283	6.93227	7.12965	6.59185	6.70375	6.39745	6.99825	5.18665	6.56435
1425193_at	RIKEN cDNA 2010106G01 gene	2010106G01Rik	723.654	206.258	3.5085	0.00430444	Yes	No	---	0016020 // membrane // inferred from electronic annotation /// 0016021 // integral to membrane // inferred from electronic annotation	0004190 // aspartic-type endopeptidase activity // inferred from electronic annotation /// 0008233 // peptidase activity // inferred from electronic annotation /// 0016787 // hydrolase activity // inferred from electronic annotation	7.76449	7.61438	7.68604	9.66692	9.34443	9.48612	9.07628	8.96439	9.10307	9.49916	7.6883	9.04791
1429491_s_at	Rap1 interacting factor 1 homolog (yeast)	Rif1	626.456	179.253	3.49481	0.00380785	Yes	No	0006974 // response to DNA damage stimulus // inferred from electronic annotation /// 0007049 // cell cycle // inferred from electronic annotation /// 0019827 // stem cell maintenance // inferred from mutant phenotype	0000781 // chromosome, telomeric region // inferred from direct assay /// 0000781 // chromosome, telomeric region // inferred from electronic annotation /// 0001939 // female pronucleus // inferred from direct assay /// 0001940 // male pronucleus // inferred from direct assay /// 0005634 // nucleus // inferred from direct assay /// 0005634 // nucleus // inferred from electronic annotation /// 000…	0005488 // binding // inferred from electronic annotation	7.62198	7.41194	7.42365	9.34411	9.28777	9.24133	9.71346	9.539	9.47875	9.29107	7.48586	9.57707
1460623_at	src family associated phosphoprotein 2	Skap2	440.711	126.226	3.49145	0.00459075	Yes	No	0008285 // negative regulation of cell proliferation // inferred from mutant phenotype /// 0042113 // B cell activation // inferred from electronic annotation	0005737 // cytoplasm // inferred from direct assay /// 0005737 // cytoplasm // inferred from electronic annotation /// 0005886 // plasma membrane // not recorded /// 0005886 // plasma membrane // inferred from electronic annotation	---	7.10359	7.01629	6.81971	8.72555	8.96928	8.65624	7.74178	7.64433	7.75547	8.78369	6.97986	7.71386
1434310_at	bone morphogenic protein receptor, type II (serine/threonine kinase)	Bmpr2	600.367	172.658	3.4772	0.00454726	Yes	No	0001707 // mesoderm formation // inferred from mutant phenotype /// 0001934 // positive regulation of protein amino acid phosphorylation // not recorded /// 0006468 // protein amino acid phosphorylation // inferred from electronic annotation /// 0009952 // anterior/posterior pattern formation // inferred from genetic interaction /// 0009952 // anterior/posterior pattern formation // inferred from…	0009986 // cell surface // inferred from direct assay /// 0016020 // membrane // inferred from electronic annotation /// 0016021 // integral to membrane // inferred from electronic annotation	0000166 // nucleotide binding // inferred from electronic annotation /// 0000287 // magnesium ion binding // inferred from electronic annotation /// 0004672 // protein kinase activity // inferred from electronic annotation /// 0004674 // protein serine/threonine kinase activity // inferred from electronic annotation /// 0004675 // transmembrane receptor protein serine/threonine kinase activity //…	7.37116	7.28786	7.6363	9.33861	9.23892	9.11157	8.77289	9.0801	8.44025	9.2297	7.43177	8.76441
1447784_x_at	solute carrier family 38, member 9	Slc38a9	323.384	93.3238	3.46519	0.00417426	Yes	No	0006810 // transport // inferred from electronic annotation /// 0006811 // ion transport // inferred from electronic annotation /// 0006814 // sodium ion transport // inferred from electronic annotation /// 0006865 // amino acid transport // inferred from electronic annotation	0016020 // membrane // inferred from electronic annotation /// 0016021 // integral to membrane // inferred from electronic annotation	0031402 // sodium ion binding // inferred from electronic annotation	6.67845	6.45565	6.49842	8.22494	8.44244	8.34394	7.80832	7.80832	7.68158	8.33711	6.54417	7.76607
1436448_a_at	prostaglandin-endoperoxide synthase 1	Ptgs1	52.5649	15.2169	3.45436	0.0046807	Yes	No	0001516 // prostaglandin biosynthetic process // inferred from mutant phenotype /// 0001516 // prostaglandin biosynthetic process // inferred from electronic annotation /// 0006633 // fatty acid biosynthetic process // inferred from electronic annotation /// 0006693 // prostaglandin metabolic process // inferred from mutant phenotype /// 0006979 // response to oxidative stress // inferred from el…	0005634 // nucleus // inferred from direct assay /// 0005737 // cytoplasm // inferred from direct assay /// 0005783 // endoplasmic reticulum // inferred from electronic annotation /// 0005789 // endoplasmic reticulum membrane // inferred from electronic annotation /// 0005792 // microsome // inferred from direct assay /// 0005792 // microsome // inferred from electronic annotation /// 0016020 // …	0004601 // peroxidase activity // inferred from electronic annotation /// 0004666 // prostaglandin-endoperoxide synthase activity // inferred from electronic annotation /// 0005506 // iron ion binding // inferred from electronic annotation /// 0008289 // lipid binding // inferred from electronic annotation /// 0016491 // oxidoreductase activity // inferred from electronic annotation /// 0016702 /…	4.148	3.72713	3.90769	5.76437	5.60256	5.78115	3.7341	3.38694	3.85873	5.71603	3.92761	3.65992
1426395_s_at	eukaryotic translation initiation factor 3, subunit J	Eif3j	347.866	100.866	3.4488	0.00430444	Yes	No	0006412 // translation // inferred from electronic annotation	---	0003743 // translation initiation factor activity // inferred from electronic annotation	6.68623	6.49728	6.78537	8.40527	8.58464	8.33725	6.94917	7.05417	7.01166	8.44239	6.65629	7.005
1435390_at	exonuclease domain containing 1	Exod1	255.496	74.4024	3.43398	0.00430444	Yes	No	---	0005622 // intracellular // inferred from electronic annotation	0000287 // magnesium ion binding // inferred from electronic annotation /// 0003676 // nucleic acid binding // inferred from electronic annotation /// 0004518 // nuclease activity // inferred from electronic annotation /// 0004527 // exonuclease activity // inferred from electronic annotation /// 0008270 // zinc ion binding // inferred from electronic annotation /// 0016787 // hydrolase activity …	6.14184	6.16093	6.34906	7.94661	8.16924	7.87562	7.2433	7.10875	7.45189	7.99716	6.21728	7.26798
1436128_at	pleckstrin homology domain containing, family A (phosphoinositide binding specif	Plekha8	91.4755	26.8352	3.40879	0.00430444	Yes	No	0006810 // transport // inferred from electronic annotation /// 0015031 // protein transport // inferred from electronic annotation /// 0046836 // glycolipid transport // inferred from electronic annotation	0005737 // cytoplasm // inferred from electronic annotation	0017089 // glycolipid transporter activity // inferred from electronic annotation /// 0051861 // glycolipid binding // inferred from electronic annotation	4.56371	4.90048	4.77397	6.42715	6.56445	6.55434	5.52786	5.52786	5.52786	6.51531	4.74605	5.52786
1416681_at	ubiquitin protein ligase E3A	Ube3a	68.0563	19.9727	3.40747	0.00424039	Yes	No	0006464 // protein modification process // inferred from electronic annotation /// 0006511 // ubiquitin-dependent protein catabolic process // inferred from electronic annotation /// 0016567 // protein ubiquitination // inferred from direct assay	0005622 // intracellular // inferred from electronic annotation /// 0005634 // nucleus // inferred from direct assay /// 0005634 // nucleus // inferred from electronic annotation /// 0005737 // cytoplasm // inferred from electronic annotation /// 0005829 // cytosol // inferred from direct assay /// 0005829 // cytosol // inferred from electronic annotation /// 0043234 // protein complex // inferre…	0004842 // ubiquitin-protein ligase activity // inferred from direct assay /// 0005515 // protein binding // inferred from physical interaction /// 0005515 // protein binding // inferred from electronic annotation /// 0016874 // ligase activity // inferred from electronic annotation /// 0016881 // acid-amino acid ligase activity // inferred from electronic annotation	4.38327	4.2304	4.3462	6.20648	6.12815	5.93134	4.58484	4.83545	4.838	6.08866	4.31996	4.75276
1426356_at	RIKEN cDNA 6330578E17 gene	6330578E17Rik	295.588	86.9833	3.39821	0.00492234	Yes	No	---	---	---	6.59239	6.17798	6.55763	8.29508	8.11563	8.21162	7.42189	7.60146	6.71846	8.20744	6.44267	7.24727
1423723_s_at	TAR DNA binding protein	Tardbp	2587.48	761.602	3.39742	0.0046807	Yes	No	0006350 // transcription // inferred from electronic annotation /// 0006355 // regulation of transcription, DNA-dependent // inferred from electronic annotation /// 0006397 // mRNA processing // inferred from electronic annotation /// 0008380 // RNA splicing // inferred from electronic annotation	0005634 // nucleus // inferred from electronic annotation	0000166 // nucleotide binding // inferred from electronic annotation /// 0003676 // nucleic acid binding // inferred from electronic annotation /// 0003677 // DNA binding // inferred from electronic annotation /// 0003723 // RNA binding // inferred from electronic annotation	9.69186	9.32325	9.70357	11.3559	11.4035	11.2526	11.2473	11.3418	10.2558	11.3373	9.57289	10.9483
1424500_at	UTP6, small subunit (SSU) processome component, homolog (yeast)	Utp6	785.204	231.251	3.39547	0.00478369	Yes	No	0006364 // rRNA processing // inferred from electronic annotation /// 0006396 // RNA processing // inferred from electronic annotation	0005622 // intracellular // inferred from electronic annotation /// 0005634 // nucleus // inferred from electronic annotation	0005515 // protein binding // inferred from physical interaction	7.79107	7.653	8.11587	9.64084	9.62288	9.58705	9.11585	9.1181	8.67093	9.61692	7.85331	8.96829
1415963_at	heterogeneous nuclear ribonucleoprotein H2	Hnrnph2	3451.16	1016.71	3.39444	0.00424039	Yes	No	---	0005634 // nucleus // inferred from electronic annotation /// 0030529 // ribonucleoprotein complex // inferred from electronic annotation	0000166 // nucleotide binding // inferred from electronic annotation /// 0003676 // nucleic acid binding // inferred from electronic annotation /// 0003723 // RNA binding // inferred from electronic annotation	9.98112	9.88546	10.1025	11.6712	11.6883	11.8991	11.2671	11.1056	10.7879	11.7529	9.98969	11.0535
1428103_at	a disintegrin and metallopeptidase domain 10	Adam10	2543.97	749.931	3.39228	0.00492234	Yes	No	0001701 // in utero embryonic development // inferred from mutant phenotype /// 0006468 // protein amino acid phosphorylation // inferred from direct assay /// 0006508 // proteolysis // inferred from electronic annotation /// 0006509 // membrane protein ectodomain proteolysis // inferred from sequence or structural similarity /// 0006913 // nucleocytoplasmic transport // non-traceable author stat…	0005578 // proteinaceous extracellular matrix // inferred from electronic annotation /// 0005634 // nucleus // inferred from direct assay /// 0005737 // cytoplasm // inferred from direct assay /// 0005794 // Golgi apparatus // inferred from sequence or structural similarity /// 0005798 // Golgi-associated vesicle // inferred from sequence or structural similarity /// 0005886 // plasma membrane //…	0004175 // endopeptidase activity // inferred from direct assay /// 0004222 // metalloendopeptidase activity // inferred from electronic annotation /// 0005515 // protein binding // inferred from physical interaction /// 0008233 // peptidase activity // inferred from electronic annotation /// 0008237 // metallopeptidase activity // inferred from electronic annotation /// 0008237 // metallopeptida…	9.68675	9.29744	9.66765	11.2658	11.4378	11.235	11.2102	10.9523	11.0295	11.3129	9.55061	11.064
1442348_at	---	---	102.575	30.3403	3.38082	0.00440516	Yes	No	---	---	---	4.78462	4.89844	5.08643	6.81097	6.67312	6.55752	5.49677	5.56141	5.38537	6.68054	4.92316	5.48118
1433505_a_at	leucine rich repeat containing 8D	Lrrc8d	719.94	213.226	3.37642	0.00459075	Yes	No	---	0016020 // membrane // inferred from electronic annotation /// 0016021 // integral to membrane // inferred from electronic annotation	0005515 // protein binding // inferred from electronic annotation	7.63791	7.78443	7.78638	9.3578	9.71856	9.39884	9.15966	9.32937	8.84007	9.49173	7.73624	9.1097
1439127_at	expressed sequence AI314180	AI314180	133.2	39.877	3.34028	0.00496477	Yes	No	0030433 // ER-associated protein catabolic process // inferred from electronic annotation	0000502 // proteasome complex // inferred from electronic annotation /// 0005634 // nucleus // inferred from electronic annotation /// 0005768 // endosome // inferred from electronic annotation /// 0005769 // early endosome // inferred from electronic annotation /// 0005770 // late endosome // inferred from electronic annotation /// 0005783 // endoplasmic reticulum // inferred from electronic ann…	0005488 // binding // inferred from electronic annotation	5.4346	5.10707	5.41078	7.23303	6.90585	7.03348	9.18766	9.18105	8.7471	7.05745	5.31748	9.0386
1455079_at	DCN1, defective in cullin neddylation 1, domain containing 4 (S. cerevisiae)	Dcun1d4	315.944	94.627	3.33883	0.00459075	Yes	No	---	0005634 // nucleus // inferred from electronic annotation	---	6.49545	6.70487	6.49222	8.09711	8.42411	8.38935	7.5889	7.44862	7.31636	8.30352	6.56418	7.45129
1433756_at	S100P binding protein	S100pbp	723.146	217.192	3.32953	0.00492234	Yes	No	---	0005634 // nucleus // inferred from electronic annotation	0048306 // calcium-dependent protein binding // inferred from electronic annotation	7.72116	7.57469	7.99263	9.46404	9.62918	9.40121	8.85482	9.1866	8.42236	9.49814	7.76283	8.82126
1449194_at	mitochondrial ribosomal protein S25	Mrps25	530.927	159.474	3.32923	0.00430444	Yes	No	---	0005739 // mitochondrion // inferred from direct assay /// 0005739 // mitochondrion // inferred from electronic annotation /// 0005763 // mitochondrial small ribosomal subunit // inferred from sequence or structural similarity /// 0005840 // ribosome // inferred from electronic annotation /// 0030529 // ribonucleoprotein complex // inferred from electronic annotation	0003735 // structural constituent of ribosome // not recorded	7.4165	7.16497	7.37007	9.18095	9.02145	8.95471	8.03298	8.03298	7.37332	9.05237	7.31718	7.81309
1455094_s_at	ubiquitin-conjugating enzyme E2G 1 (UBC7 homolog, C. elegans)	Ube2g1	411.559	123.669	3.32792	0.00414948	Yes	No	0006511 // ubiquitin-dependent protein catabolic process // inferred from electronic annotation /// 0043687 // post-translational protein modification // inferred from electronic annotation /// 0051246 // regulation of protein metabolic process // inferred from electronic annotation	---	0004842 // ubiquitin-protein ligase activity // inferred from electronic annotation /// 0016874 // ligase activity // inferred from electronic annotation /// 0019787 // small conjugating protein ligase activity // inferred from electronic annotation	7.08478	6.90049	6.86574	8.60755	8.67166	8.77566	8.02439	8.02439	7.7256	8.68496	6.95034	7.92479
1431295_a_at	syntaxin 18	Stx18	65.6227	19.7688	3.31951	0.00459075	Yes	No	0006810 // transport // inferred from electronic annotation /// 0006886 // intracellular protein transport // inferred from electronic annotation /// 0015031 // protein transport // inferred from electronic annotation /// 0016192 // vesicle-mediated transport // inferred from electronic annotation	0000139 // Golgi membrane // inferred from electronic annotation /// 0005783 // endoplasmic reticulum // inferred from electronic annotation /// 0005789 // endoplasmic reticulum membrane // inferred from electronic annotation /// 0005794 // Golgi apparatus // inferred from electronic annotation /// 0016020 // membrane // inferred from electronic annotation /// 0016021 // integral to membrane // i…	0005484 // SNAP receptor activity // inferred from electronic annotation	4.4061	4.36837	4.14099	6.18509	5.86574	6.05754	5.26236	4.93684	4.41767	6.03612	4.30515	4.87229
1449348_at	membrane protein, palmitoylated 6 (MAGUK p55 subfamily member 6)	Mpp6	550.338	165.856	3.31818	0.00430444	Yes	No	---	0005886 // plasma membrane // inferred from direct assay /// 0016020 // membrane // inferred from electronic annotation /// 0016021 // integral to membrane // inferred from sequence or structural similarity	0004385 // guanylate kinase activity // inferred from sequence or structural similarity /// 0005515 // protein binding // inferred from electronic annotation	7.36178	7.50886	7.25071	9.26137	9.04902	9.00213	8.86426	8.83832	8.50085	9.10417	7.37378	8.73448
1436942_at	RIKEN cDNA A930035D04 gene	A930035D04Rik	59.9811	18.1194	3.31032	0.0048824	Yes	No	---	---	---	4.22869	4.19701	4.1127	5.74046	6.16946	5.80939	4.73705	4.67523	4.33853	5.90644	4.17947	4.5836
1433955_at	bromodomain and WD repeat domain containing 1	Brwd1	214.371	65.1666	3.28958	0.00430444	Yes	No	0006350 // transcription // inferred from electronic annotation /// 0006355 // regulation of transcription, DNA-dependent // inferred from electronic annotation /// 0006357 // regulation of transcription from RNA polymerase II promoter // inferred from direct assay	0005634 // nucleus // inferred from direct assay /// 0005634 // nucleus // inferred from electronic annotation /// 0005737 // cytoplasm // inferred from electronic annotation	0005515 // protein binding // inferred from physical interaction /// 0030528 // transcription regulator activity // inferred from direct assay	5.92446	6.21405	5.93967	7.74028	7.67987	7.81174	7.42959	7.40227	6.80275	7.74396	6.02606	7.21154
1453064_at	Ewing's tumor-associated antigen 1	Etaa1	271.682	82.6558	3.28691	0.00470066	Yes	No	---	0005737 // cytoplasm // inferred from electronic annotation	---	6.35804	6.15941	6.58968	8.04002	8.16214	8.05517	6.7145	6.79383	6.97338	8.08578	6.36904	6.82724
1430029_a_at	tetraspanin 31	Tspan31	849.896	258.61	3.2864	0.00248757	Yes	No	---	0016020 // membrane // inferred from electronic annotation /// 0016021 // integral to membrane // inferred from electronic annotation	---	7.98182	8.05318	8.00891	9.69045	9.78754	9.71544	8.59173	8.48005	8.56353	9.73114	8.01464	8.5451
1424589_s_at	RNA-binding region (RNP1, RRM) containing 3	Rnpc3	152.442	46.39	3.28609	0.00417426	Yes	No	---	0005634 // nucleus // inferred from sequence or structural similarity /// 0005634 // nucleus // inferred from electronic annotation /// 0005689 // U12-dependent spliceosome // inferred from sequence or structural similarity	0000166 // nucleotide binding // inferred from electronic annotation /// 0003676 // nucleic acid binding // inferred from electronic annotation /// 0003723 // RNA binding // inferred from electronic annotation	5.61805	5.41552	5.57366	7.37442	7.20938	7.17254	5.54063	5.07505	5.36321	7.25211	5.53574	5.3263
1448844_at	cytochrome b5 type B	Cyb5b	829.099	253.847	3.26613	0.00397645	Yes	No	0006810 // transport // inferred from electronic annotation /// 0022900 // electron transport chain // inferred from electronic annotation	0005739 // mitochondrion // inferred from electronic annotation /// 0005741 // mitochondrial outer membrane // inferred from electronic annotation /// 0005743 // mitochondrial inner membrane // inferred from direct assay /// 0005792 // microsome // inferred from electronic annotation /// 0016020 // membrane // inferred from electronic annotation /// 0016021 // integral to membrane // inferred fro…	0005506 // iron ion binding // inferred from electronic annotation /// 0008047 // enzyme activator activity // inferred from electronic annotation /// 0020037 // heme binding // inferred from electronic annotation /// 0046872 // metal ion binding // inferred from electronic annotation /// 0046914 // transition metal ion binding // inferred from electronic annotation	7.87555	8.04395	8.04395	9.64774	9.63325	9.80521	7.90077	7.61624	7.64271	9.6954	7.98782	7.71991
1435834_at	Fanconi anemia, complementation group F	Fancf	162.128	50.0856	3.23703	0.00496477	Yes	No	---	---	---	5.59498	5.44624	5.89775	7.3443	7.271	7.40768	6.08082	6.01627	5.99767	7.34099	5.64632	6.03159
1433930_at	heparanase	Hpse	209.146	64.7356	3.23077	0.0046807	Yes	No	---	0005576 // extracellular region // inferred from electronic annotation /// 0005578 // proteinaceous extracellular matrix // traceable author statement /// 0005764 // lysosome // inferred from electronic annotation /// 0005765 // lysosomal membrane // inferred from electronic annotation /// 0016020 // membrane // inferred from electronic annotation	0000287 // magnesium ion binding // inferred from electronic annotation /// 0005509 // calcium ion binding // inferred from electronic annotation /// 0016787 // hydrolase activity // inferred from electronic annotation /// 0016798 // hydrolase activity, acting on glycosyl bonds // inferred from electronic annotation /// 0030305 // heparanase activity // not recorded	5.82791	6.02279	6.19876	7.78058	7.76647	7.57805	7.3228	6.93733	6.75452	7.70837	6.01649	7.00488
1443628_at	---	---	310.594	96.3342	3.22413	0.00491977	Yes	No	---	---	---	6.58063	6.51076	6.67854	8.1955	8.11487	8.52629	7.92124	8.39711	7.82587	8.27889	6.58998	8.04807
1428386_at	acyl-CoA synthetase long-chain family member 3	Acsl3	67.5898	21.0563	3.20995	0.00293081	Yes	No	0006629 // lipid metabolic process // inferred from electronic annotation /// 0006631 // fatty acid metabolic process // inferred from electronic annotation /// 0008152 // metabolic process // inferred from electronic annotation	0005739 // mitochondrion // inferred from electronic annotation /// 0005741 // mitochondrial outer membrane // inferred from electronic annotation /// 0005777 // peroxisome // inferred from electronic annotation /// 0005778 // peroxisomal membrane // inferred from electronic annotation /// 0005783 // endoplasmic reticulum // inferred from electronic annotation /// 0005789 // endoplasmic reticulum…	0000287 // magnesium ion binding // inferred from electronic annotation /// 0003824 // catalytic activity // inferred from electronic annotation /// 0004467 // long-chain-fatty-acid-CoA ligase activity // inferred from electronic annotation /// 0005515 // protein binding // inferred from electronic annotation /// 0016874 // ligase activity // inferred from electronic annotation	4.33119	4.44167	4.41569	6.13361	6.1106	5.99199	5.20145	5.20145	5.01207	6.07873	4.39618	5.13832
1437177_at	La ribonucleoprotein domain family, member 4	Larp4	274.92	85.7018	3.20787	0.00459075	Yes	No	---	---	0003676 // nucleic acid binding // inferred from electronic annotation /// 0003723 // RNA binding // inferred from electronic annotation	6.23535	6.39468	6.63373	8.14468	8.07745	8.08648	8.45955	8.62876	8.06228	8.10287	6.42125	8.38353
1460352_s_at	phosphatidylinositol 3 kinase, regulatory subunit, polypeptide 4, p150	Pik3r4	506.13	157.904	3.20529	0.0046807	Yes	No	0006468 // protein amino acid phosphorylation // inferred from electronic annotation	---	0000166 // nucleotide binding // inferred from electronic annotation /// 0004672 // protein kinase activity // inferred from electronic annotation /// 0004674 // protein serine/threonine kinase activity // inferred from electronic annotation /// 0004713 // protein tyrosine kinase activity // inferred from electronic annotation /// 0005488 // binding // inferred from electronic annotation /// 0005…	7.4833	7.09357	7.33185	9.08856	8.94422	8.91731	9.13218	9.18986	8.34542	8.98336	7.30291	8.88915
1436770_x_at	proteasome (prosome, macropain) subunit, alpha type 1	Psma1	73.2024	23.0024	3.18238	0.00459075	Yes	No	0006511 // ubiquitin-dependent protein catabolic process // inferred from electronic annotation	0005634 // nucleus // inferred from electronic annotation /// 0005737 // cytoplasm // inferred from electronic annotation /// 0005829 // cytosol // inferred from electronic annotation /// 0005839 // proteasome core complex // inferred from electronic annotation /// 0043234 // protein complex // inferred from electronic annotation	0004175 // endopeptidase activity // inferred from electronic annotation /// 0004298 // threonine-type endopeptidase activity // inferred from electronic annotation /// 0005515 // protein binding // inferred from physical interaction /// 0008233 // peptidase activity // inferred from electronic annotation /// 0016787 // hydrolase activity // inferred from electronic annotation	4.49125	4.52066	4.55923	5.98791	6.38158	6.21197	5.39887	5.39887	4.55457	6.19382	4.52371	5.11744
1439428_x_at	GDP-mannose 4, 6-dehydratase	Gmds	45.8245	14.4186	3.17816	0.00422529	Yes	No	0008152 // metabolic process // inferred from electronic annotation /// 0019673 // GDP-mannose metabolic process // inferred from electronic annotation /// 0044237 // cellular metabolic process // inferred from electronic annotation	0005622 // intracellular // inferred from electronic annotation	0003824 // catalytic activity // inferred from electronic annotation /// 0005488 // binding // inferred from electronic annotation /// 0008446 // GDP-mannose 4,6-dehydratase activity // inferred from electronic annotation /// 0016829 // lyase activity // inferred from electronic annotation /// 0050662 // coenzyme binding // inferred from electronic annotation	3.88303	3.8356	3.83094	5.65205	5.54553	5.35656	4.3151	4.4708	4.61633	5.51805	3.84986	4.46741
1416155_at	high mobility group box 3	Hmgb3	948.357	299.069	3.17103	0.00430444	Yes	No	0045578 // negative regulation of B cell differentiation // inferred from direct assay /// 0045638 // negative regulation of myeloid cell differentiation // inferred from direct assay	0005634 // nucleus // inferred from direct assay /// 0005634 // nucleus // inferred from electronic annotation /// 0005694 // chromosome // inferred from electronic annotation	0003677 // DNA binding // inferred from electronic annotation	8.30594	8.05424	8.31282	9.83896	9.96021	9.86869	9.62925	9.40189	8.60949	9.88929	8.22433	9.21354
1416308_at	UDP-glucose dehydrogenase	Ugdh	846.166	266.92	3.17011	0.00414948	Yes	No	0001702 // gastrulation with mouth forming second // inferred from mutant phenotype /// 0008152 // metabolic process // inferred from electronic annotation /// 0055114 // oxidation reduction // inferred from electronic annotation	---	0003824 // catalytic activity // inferred from electronic annotation /// 0003979 // UDP-glucose 6-dehydrogenase activity // inferred from electronic annotation /// 0005488 // binding // inferred from electronic annotation /// 0016491 // oxidoreductase activity // inferred from electronic annotation /// 0016616 // oxidoreductase activity, acting on the CH-OH group of donors, NAD or NADP as accepto…	8.17617	8.09149	7.91313	9.67172	9.75287	9.7498	9.02617	8.84174	8.94191	9.7248	8.06026	8.93661
1435366_at	RIKEN cDNA D430042O09 gene	D430042O09Rik	63.6054	20.1826	3.1515	0.00424039	Yes	No	---	---	---	4.37697	4.23799	4.39016	6.14184	5.93483	5.89656	5.62027	5.58738	5.86403	5.99108	4.33504	5.69056
1428930_at	transmembrane protein 29	Tmem29	234.093	74.8209	3.12871	0.00316819	Yes	No	---	0016021 // integral to membrane // inferred from electronic annotation	---	6.23282	6.15565	6.28764	7.95608	7.84558	7.81116	7.10566	7.20938	6.92275	7.87094	6.22537	7.07926
1417172_at	ubiquitin-conjugating enzyme E2L 6	Ube2l6	92.2274	29.4988	3.12648	0.00476976	Yes	No	0006511 // ubiquitin-dependent protein catabolic process // inferred from electronic annotation /// 0019941 // modification-dependent protein catabolic process // inferred from direct assay /// 0032020 // ISG15-protein conjugation // inferred from direct assay /// 0043687 // post-translational protein modification // inferred from electronic annotation /// 0051246 // regulation of protein metabol…	---	0004842 // ubiquitin-protein ligase activity // inferred from electronic annotation /// 0005515 // protein binding // inferred from physical interaction /// 0016874 // ligase activity // inferred from electronic annotation /// 0019787 // small conjugating protein ligase activity // inferred from direct assay /// 0019787 // small conjugating protein ligase activity // inferred from electronic anno…	4.77848	4.96391	4.90536	6.67703	6.30086	6.60348	5.62992	5.17291	5.41728	6.52712	4.88258	5.4067
1419276_at	ectonucleotide pyrophosphatase/phosphodiesterase 1	Enpp1	228.448	73.0723	3.12632	0.00492234	Yes	No	0001503 // ossification // inferred from electronic annotation /// 0008152 // metabolic process // inferred from electronic annotation /// 0030279 // negative regulation of ossification // inferred from mutant phenotype /// 0045599 // negative regulation of fat cell differentiation // inferred from mutant phenotype /// 0046849 // bone remodeling // inferred from mutant phenotype	0005615 // extracellular space // inferred from direct assay /// 0005886 // plasma membrane // inferred from electronic annotation /// 0009986 // cell surface // inferred from direct assay /// 0016020 // membrane // inferred from electronic annotation /// 0016021 // integral to membrane // inferred from electronic annotation /// 0016323 // basolateral plasma membrane // inferred from electronic a…	0003676 // nucleic acid binding // inferred from electronic annotation /// 0003824 // catalytic activity // inferred from electronic annotation /// 0004519 // endonuclease activity // inferred from electronic annotation /// 0004528 // phosphodiesterase I activity // inferred from electronic annotation /// 0004551 // nucleotide diphosphatase activity // inferred from electronic annotation /// 0016…	6.12501	6.10709	6.34166	8.03319	7.65414	7.81983	7.37929	6.87509	7.42376	7.83572	6.19125	7.22605
1451559_a_at	dehydrogenase/reductase (SDR family) member 4	Dhrs4	415.618	132.972	3.12561	0.0046807	Yes	No	0008152 // metabolic process // inferred from electronic annotation /// 0042574 // retinal metabolic process // inferred from direct assay /// 0055114 // oxidation reduction // inferred from electronic annotation	0005739 // mitochondrion // inferred from direct assay /// 0005777 // peroxisome // inferred from direct assay /// 0005777 // peroxisome // inferred from electronic annotation	0001758 // retinal dehydrogenase activity // inferred from direct assay /// 0003824 // catalytic activity // inferred from electronic annotation /// 0004090 // carbonyl reductase (NADPH) activity // inferred from electronic annotation /// 0005488 // binding // inferred from electronic annotation /// 0016491 // oxidoreductase activity // inferred from electronic annotation	7.16136	7.0079	6.99566	8.8153	8.80529	8.47675	8.28822	8.14331	7.76886	8.69911	7.05497	8.0668
1434174_at	LysM, putative peptidoglycan-binding, domain containing 3	Lysmd3	624.377	200.048	3.12113	0.0046807	Yes	No	0016998 // cell wall catabolic process // inferred from electronic annotation	0016020 // membrane // inferred from electronic annotation /// 0016021 // integral to membrane // inferred from electronic annotation	---	7.69394	7.41908	7.81959	9.29008	9.33523	9.23351	8.28425	8.25221	8.14352	9.28627	7.6442	8.22666
1419585_at	retinitis pigmentosa 2 homolog (human)	Rp2h	91.4806	29.3664	3.11514	0.00470066	Yes	No	0006183 // GTP biosynthetic process // inferred from electronic annotation /// 0006228 // UTP biosynthetic process // inferred from electronic annotation /// 0006241 // CTP biosynthetic process // inferred from electronic annotation	0005886 // plasma membrane // inferred from electronic annotation /// 0016020 // membrane // inferred from electronic annotation	0004550 // nucleoside diphosphate kinase activity // inferred from electronic annotation /// 0005488 // binding // inferred from electronic annotation /// 0005524 // ATP binding // inferred from electronic annotation	5.11541	4.75239	4.76049	6.4854	6.59007	6.47071	6.02992	6.03973	5.58143	6.51539	4.8761	5.88369
1454905_at	inhibitor of Bruton agammaglobulinemia tyrosine kinase	Ibtk	683.842	219.79	3.11134	0.00496477	Yes	No	0001933 // negative regulation of protein amino acid phosphorylation // not recorded /// 0051209 // release of sequestered calcium ion into cytosol // not recorded	0005737 // cytoplasm // not recorded /// 0005737 // cytoplasm // inferred from electronic annotation /// 0016020 // membrane // inferred from electronic annotation	0005515 // protein binding // inferred from electronic annotation /// 0019901 // protein kinase binding // not recorded /// 0030292 // protein tyrosine kinase inhibitor activity // not recorded	7.82782	7.54327	7.96886	9.4236	9.33255	9.49641	9.01128	9.04083	8.4565	9.41752	7.77998	8.8362
1434630_at	ankyrin repeat domain 28	Ankrd28	387.298	125.014	3.09803	0.00417426	Yes	No	---	0005634 // nucleus // inferred from electronic annotation	0005515 // protein binding // inferred from electronic annotation	7.01048	6.9127	6.97466	8.75369	8.50253	8.53568	8.24183	8.13515	7.83668	8.5973	6.96595	8.07122
1438517_at	WW domain-containing oxidoreductase	Wwox	87.2686	28.295	3.08424	0.00440516	Yes	No	0001649 // osteoblast differentiation // inferred from mutant phenotype /// 0006917 // induction of apoptosis // inferred from direct assay /// 0007049 // cell cycle // inferred from electronic annotation /// 0008152 // metabolic process // inferred from electronic annotation /// 0045786 // negative regulation of cell cycle // inferred from electronic annotation /// 0048705 // skeletal system mor…	0005634 // nucleus // inferred from direct assay /// 0005634 // nucleus // inferred from electronic annotation /// 0005737 // cytoplasm // inferred from electronic annotation /// 0005739 // mitochondrion // inferred from direct assay /// 0005739 // mitochondrion // inferred from electronic annotation	0003824 // catalytic activity // inferred from electronic annotation /// 0005488 // binding // inferred from electronic annotation /// 0005515 // protein binding // inferred from physical interaction /// 0005515 // protein binding // inferred from electronic annotation /// 0016491 // oxidoreductase activity // inferred from electronic annotation	4.7006	4.97541	4.79141	6.57089	6.45133	6.31995	6.71213	6.87236	6.25368	6.44739	4.82247	6.61272
1418402_at	a disintegrin and metallopeptidase domain 19 (meltrin beta) /// similar to metal	Adam19 /// LOC100045780	2052.07	665.513	3.08345	0.00430444	Yes	No	0006508 // proteolysis // inferred from electronic annotation /// 0006509 // membrane protein ectodomain proteolysis // inferred from mutant phenotype /// 0007229 // integrin-mediated signaling pathway // inferred from electronic annotation /// 0007507 // heart development // inferred from mutant phenotype	0005578 // proteinaceous extracellular matrix // inferred from electronic annotation /// 0016020 // membrane // inferred from electronic annotation /// 0016021 // integral to membrane // inferred from electronic annotation	0004222 // metalloendopeptidase activity // inferred from electronic annotation /// 0005515 // protein binding // inferred from physical interaction /// 0008233 // peptidase activity // inferred from electronic annotation /// 0008237 // metallopeptidase activity // inferred from electronic annotation /// 0008270 // zinc ion binding // inferred from electronic annotation /// 0016787 // hydrolase a…	9.44231	9.23796	9.4547	11.1259	10.9247	10.958	10.0788	10.0561	10.0353	11.0029	9.37832	10.0567
1425059_at	protein arginine N-methyltransferase 6	Prmt6	209.682	68.4197	3.06464	0.0046807	Yes	No	0008152 // metabolic process // inferred from electronic annotation	0005634 // nucleus // inferred from electronic annotation	0008168 // methyltransferase activity // inferred from electronic annotation /// 0016740 // transferase activity // inferred from electronic annotation	6.23567	6.0431	6.01025	7.52744	7.74919	7.85954	7.11465	7.03446	6.38789	7.71206	6.09634	6.84567
1454741_s_at	transmembrane protein 164	Tmem164	632.165	206.533	3.06085	0.00397645	Yes	No	---	0016020 // membrane // inferred from electronic annotation /// 0016021 // integral to membrane // inferred from electronic annotation	---	7.61139	7.71108	7.74821	9.19594	9.31758	9.39895	9.44576	9.41887	8.86587	9.30416	7.69023	9.2435
1435548_at	MRS2 magnesium homeostasis factor homolog (S. cerevisiae)	Mrs2	149.909	49.0161	3.05836	0.00397645	Yes	No	0006810 // transport // inferred from electronic annotation /// 0006811 // ion transport // inferred from electronic annotation /// 0030001 // metal ion transport // inferred from electronic annotation	0005739 // mitochondrion // inferred from electronic annotation /// 0005743 // mitochondrial inner membrane // inferred from electronic annotation /// 0016020 // membrane // inferred from electronic annotation /// 0016021 // integral to membrane // inferred from electronic annotation	0000287 // magnesium ion binding // inferred from electronic annotation /// 0046873 // metal ion transmembrane transporter activity // inferred from electronic annotation	5.61666	5.49768	5.73121	7.203	7.20745	7.27338	6.34123	6.29748	6.08797	7.22794	5.61518	6.24223
1442599_at	solute carrier family 12 (potassium/chloride transporters), member 9	Slc12a9	135.432	44.6518	3.03308	0.00476976	Yes	No	0006810 // transport // inferred from electronic annotation	0005886 // plasma membrane // inferred from electronic annotation /// 0016020 // membrane // inferred from electronic annotation /// 0016021 // integral to membrane // not recorded /// 0016021 // integral to membrane // inferred from electronic annotation	---	5.28349	5.57995	5.5785	6.95937	7.21831	7.06661	7.58093	7.6363	6.69352	7.08143	5.48065	7.30358
1437296_at	protein kinase N2	Pkn2	153.464	50.6223	3.03155	0.00492234	Yes	No	0006468 // protein amino acid phosphorylation // inferred from electronic annotation /// 0007165 // signal transduction // inferred from electronic annotation	0005622 // intracellular // inferred from electronic annotation /// 0005634 // nucleus // inferred from direct assay /// 0005737 // cytoplasm // inferred from direct assay /// 0005737 // cytoplasm // inferred from electronic annotation	0000166 // nucleotide binding // inferred from electronic annotation /// 0004672 // protein kinase activity // inferred from electronic annotation /// 0004674 // protein serine/threonine kinase activity // inferred from electronic annotation /// 0004697 // protein kinase C activity // inferred from electronic annotation /// 0005524 // ATP binding // inferred from electronic annotation /// 0016301…	5.56407	5.76266	5.65837	7.34327	7.03446	7.40753	6.69407	6.79334	6.63247	7.26175	5.6617	6.70663
1456918_at	Ras association (RalGDS/AF-6) and pleckstrin homology domains 1	Raph1	642.69	212.592	3.02312	0.00419951	Yes	No	---	---	---	7.77432	7.76658	7.65493	9.22273	9.47196	9.28925	8.54252	8.75268	8.63787	9.32798	7.73194	8.64436
1422503_s_at	poly (ADP-ribose) polymerase family, member 1	Parp1	865.936	286.637	3.02102	0.00430444	Yes	No	0000723 // telomere maintenance // inferred from mutant phenotype /// 0006259 // DNA metabolic process // inferred from mutant phenotype /// 0006281 // DNA repair // traceable author statement /// 0006281 // DNA repair // inferred from electronic annotation /// 0006284 // base-excision repair // inferred from mutant phenotype /// 0006471 // protein amino acid ADP-ribosylation // inferred from ele…	0005622 // intracellular // inferred from electronic annotation /// 0005634 // nucleus // traceable author statement /// 0005634 // nucleus // inferred from electronic annotation /// 0005654 // nucleoplasm // inferred from direct assay /// 0005730 // nucleolus // inferred from direct assay	0003677 // DNA binding // inferred from electronic annotation /// 0003950 // NAD+ ADP-ribosyltransferase activity // inferred from electronic annotation /// 0005515 // protein binding // inferred from physical interaction /// 0008270 // zinc ion binding // inferred from electronic annotation /// 0016740 // transferase activity // inferred from electronic annotation /// 0016757 // transferase acti…	8.24132	8.07252	8.1754	9.86687	9.80462	9.60286	9.74832	9.41346	9.4181	9.75812	8.16308	9.52663
1453332_at	RIKEN cDNA 2410002O22 gene /// hypothetical protein LOC100044479	2410002O22Rik /// LOC100044479	223.732	74.1407	3.01767	0.00466271	Yes	No	---	---	---	6.27153	6.04483	6.32022	7.84642	7.91753	7.65294	6.51749	6.26322	6.50334	7.80563	6.21219	6.42802
1429698_at	mitochondrial transcription termination factor	Mterf	271.847	90.1422	3.01576	0.00446103	Yes	No	0006350 // transcription // inferred from electronic annotation /// 0006353 // transcription termination // inferred from electronic annotation /// 0006355 // regulation of transcription, DNA-dependent // inferred from electronic annotation	0005739 // mitochondrion // inferred from direct assay /// 0005739 // mitochondrion // inferred from electronic annotation	0003677 // DNA binding // inferred from electronic annotation	6.35156	6.43239	6.69844	8.07642	8.13344	8.05009	7.29206	7.1807	7.09513	8.08665	6.49413	7.1893
1432374_a_at	DNA segment, Chr 5, Wayne State University 178, expressed	D5Wsu178e	83.6643	27.9479	2.99358	0.00414948	Yes	No	0008654 // phospholipid biosynthetic process // inferred from electronic annotation	0016020 // membrane // inferred from electronic annotation /// 0016021 // integral to membrane // inferred from electronic annotation	0000287 // magnesium ion binding // inferred from electronic annotation /// 0004307 // ethanolaminephosphotransferase activity // inferred from electronic annotation /// 0008430 // selenium binding // inferred from electronic annotation /// 0016740 // transferase activity // inferred from electronic annotation /// 0016780 // phosphotransferase activity, for other substituted phosphate groups // i…	4.85417	4.66542	4.89441	6.3783	6.34056	6.44076	5.0971	5.05021	5.28952	6.38654	4.80467	5.14561
1435637_at	integrin alpha FG-GAP repeat containing 1	Itfg1	193.373	65.1711	2.96716	0.00430444	Yes	No	---	0005576 // extracellular region // inferred from electronic annotation /// 0016020 // membrane // inferred from electronic annotation /// 0016021 // integral to membrane // inferred from electronic annotation	0005515 // protein binding // inferred from physical interaction	6.10711	5.87437	6.097	7.61968	7.49987	7.66618	6.58635	6.22598	6.65711	7.59524	6.02616	6.48981
1418258_s_at	dynein light chain LC8-type 2	Dynll2	517.539	174.603	2.96408	0.0046807	Yes	No	0007017 // microtubule-based process // inferred from electronic annotation /// 0007266 // Rho protein signal transduction // inferred from direct assay /// 0032880 // regulation of protein localization // inferred from direct assay /// 0046907 // intracellular transport // non-traceable author statement	0001772 // immunological synapse // inferred from direct assay /// 0005737 // cytoplasm // inferred from electronic annotation /// 0005874 // microtubule // inferred from electronic annotation /// 0005875 // microtubule associated complex // inferred from electronic annotation /// 0016459 // myosin complex // inferred from direct assay /// 0030286 // dynein complex // non-traceable author stateme…	0003774 // motor activity // inferred from electronic annotation /// 0003777 // microtubule motor activity // inferred from electronic annotation /// 0005094 // Rho GDP-dissociation inhibitor activity // inferred from direct assay /// 0005094 // Rho GDP-dissociation inhibitor activity // inferred from electronic annotation /// 0005096 // GTPase activator activity // inferred from electronic annot…	7.52337	7.22913	7.59131	9.08097	8.96169	9.00391	9.85459	9.73902	8.96169	9.01552	7.44794	9.51843
1428069_at	cell division cycle associated 7	Cdca7	523.734	177.091	2.95744	0.00440516	Yes	No	0006350 // transcription // inferred from electronic annotation /// 0006355 // regulation of transcription, DNA-dependent // inferred from electronic annotation /// 0042127 // regulation of cell proliferation // not recorded /// 0051301 // cell division // inferred from electronic annotation	0005634 // nucleus // not recorded /// 0005634 // nucleus // inferred from electronic annotation	---	7.44709	7.33301	7.62493	8.94293	9.00472	9.15042	8.49388	8.30746	8.52197	9.03269	7.46834	8.4411
1423521_at	lamin B1	Lmnb1	557.063	188.569	2.95416	0.00459075	Yes	No	---	0005634 // nucleus // inferred from direct assay /// 0005634 // nucleus // inferred from electronic annotation /// 0005637 // nuclear inner membrane // inferred from electronic annotation /// 0005638 // lamin filament // inferred from direct assay /// 0005882 // intermediate filament // inferred from electronic annotation /// 0016020 // membrane // inferred from electronic annotation	0005198 // structural molecule activity // inferred from electronic annotation	7.61713	7.56777	7.49194	9.1672	9.27931	8.91858	9.73707	9.58418	8.92933	9.1217	7.55895	9.41686
1419763_at	NFKB activating protein	Nkap	30.4112	10.4036	2.92315	0.00430444	Yes	No	---	0005634 // nucleus // inferred from electronic annotation	---	3.36947	3.38169	3.38586	4.99338	5.04395	4.74226	4.06028	3.5527	3.88643	4.92653	3.37901	3.83314
1430274_a_at	STARD3 N-terminal like	Stard3nl	349.044	119.501	2.92085	0.00440516	Yes	No	---	0005768 // endosome // inferred from electronic annotation /// 0016020 // membrane // inferred from electronic annotation /// 0016021 // integral to membrane // inferred from electronic annotation /// 0031902 // late endosome membrane // inferred from electronic annotation	---	7.03239	6.83632	6.83393	8.56251	8.30138	8.47791	6.63966	6.50019	6.88014	8.44727	6.90088	6.67333
1444746_at	---	---	732.303	251.253	2.9146	0.00466271	Yes	No	---	---	---	7.94041	7.8794	8.09918	9.33931	9.56665	9.64293	9.53857	10.0992	9.02435	9.5163	7.973	9.55404
1448126_at	family with sequence similarity 60, member A	Fam60a	372.922	129.078	2.88912	0.00476976	Yes	No	---	---	---	7.15806	6.84317	7.03507	8.39001	8.62123	8.61695	7.90313	7.56001	7.24963	8.54273	7.0121	7.57092
1439256_x_at	G protein-coupled receptor 137B, pseudogene	Gpr137b-ps	242.885	84.2649	2.88239	0.0046807	Yes	No	---	0016020 // membrane // inferred from electronic annotation /// 0016021 // integral to membrane // inferred from electronic annotation	---	6.30609	6.36253	6.52196	7.88603	8.10445	7.7819	6.95825	6.84031	7.1769	7.92413	6.39686	6.99182
1448026_at	chromodomain helicase DNA binding protein 7	Chd7	307.47	106.955	2.87476	0.00414948	Yes	No	0001568 // blood vessel development // inferred from mutant phenotype /// 0001701 // in utero embryonic development // inferred from mutant phenotype /// 0003007 // heart morphogenesis // inferred from mutant phenotype /// 0006333 // chromatin assembly or disassembly // inferred from electronic annotation /// 0006350 // transcription // inferred from electronic annotation /// 0006355 // regulatio…	0000785 // chromatin // inferred from electronic annotation /// 0005634 // nucleus // inferred from electronic annotation	0000166 // nucleotide binding // inferred from electronic annotation /// 0003676 // nucleic acid binding // inferred from electronic annotation /// 0003677 // DNA binding // inferred from electronic annotation /// 0003682 // chromatin binding // inferred from electronic annotation /// 0004386 // helicase activity // inferred from electronic annotation /// 0005524 // ATP binding // inferred from e…	6.75538	6.67702	6.79019	8.23323	8.16681	8.39287	8.24878	8.22047	7.97217	8.2643	6.74086	8.14714
1460583_at	golgi transport 1 homolog B (S. cerevisiae)	Golt1b	41.7886	14.5717	2.86779	0.00480231	Yes	No	0006810 // transport // inferred from electronic annotation /// 0015031 // protein transport // inferred from electronic annotation /// 0016192 // vesicle-mediated transport // inferred from electronic annotation /// 0043123 // positive regulation of I-kappaB kinase/NF-kappaB cascade // inferred from electronic annotation	0000139 // Golgi membrane // inferred from electronic annotation /// 0005783 // endoplasmic reticulum // inferred from electronic annotation /// 0005794 // Golgi apparatus // inferred from electronic annotation /// 0016020 // membrane // inferred from electronic annotation /// 0016021 // integral to membrane // inferred from electronic annotation	0004871 // signal transducer activity // inferred from electronic annotation	3.77003	3.73031	4.09495	5.42462	5.4049	5.32559	5.94547	5.51446	5.24055	5.38504	3.8651	5.56683
1436714_at	LIM domain containing preferred translocation partner in lipoma	Lpp	285.602	99.6932	2.86481	0.00476976	Yes	No	0007155 // cell adhesion // inferred from electronic annotation	0005634 // nucleus // inferred from electronic annotation /// 0005737 // cytoplasm // inferred from electronic annotation /// 0030054 // cell junction // inferred from electronic annotation	0005515 // protein binding // inferred from electronic annotation /// 0008270 // zinc ion binding // inferred from electronic annotation /// 0046872 // metal ion binding // inferred from electronic annotation	6.86622	6.49728	6.55477	8.10164	8.16506	8.20689	8.39816	8.37405	8.4236	8.15786	6.63942	8.3986
1437009_a_at	ring finger protein 115	Rnf115	2335.58	818.289	2.85423	0.0046807	Yes	No	---	---	0005515 // protein binding // inferred from physical interaction /// 0005515 // protein binding // inferred from electronic annotation /// 0008270 // zinc ion binding // inferred from electronic annotation /// 0046872 // metal ion binding // inferred from electronic annotation	9.77157	9.4816	9.77623	11.14	11.2976	11.1311	10.8399	10.8058	10.5626	11.1896	9.67647	10.7361
1419235_s_at	helicase (DNA) B	Helb	1405.99	494.948	2.84067	0.00248757	Yes	No	0006260 // DNA replication // inferred from electronic annotation /// 0006261 // DNA-dependent DNA replication // inferred from direct assay /// 0006269 // DNA replication, synthesis of RNA primer // traceable author statement /// 0006269 // DNA replication, synthesis of RNA primer // inferred from electronic annotation	0005658 // alpha DNA polymerase:primase complex // inferred from electronic annotation	0000166 // nucleotide binding // inferred from electronic annotation /// 0004003 // ATP-dependent DNA helicase activity // inferred from direct assay /// 0004386 // helicase activity // inferred from electronic annotation /// 0005524 // ATP binding // inferred from electronic annotation /// 0016787 // hydrolase activity // inferred from electronic annotation /// 0017116 // single-stranded DNA-dep…	8.96005	8.90491	8.98844	10.4236	10.4938	10.4547	10.7283	10.5037	9.99089	10.4574	8.95113	10.4076
1448301_s_at	serine (or cysteine) peptidase inhibitor, clade B, member 1a	Serpinb1a	33.2172	11.8359	2.80649	0.00424039	Yes	No	0042176 // regulation of protein catabolic process // inferred from physical interaction	0005737 // cytoplasm // inferred from electronic annotation	0004866 // endopeptidase inhibitor activity // inferred from electronic annotation /// 0004867 // serine-type endopeptidase inhibitor activity // inferred from electronic annotation	3.71925	3.50384	3.47219	5.09	5.01625	5.05533	4.05625	3.98357	4.10437	5.05386	3.56509	4.04806
1431921_a_at	similar to Stromal antigen 1 /// stromal antigen 1	LOC100045442 /// Stag1	896.908	320.134	2.80166	0.00491091	Yes	No	0007049 // cell cycle // inferred from electronic annotation /// 0007059 // chromosome segregation // inferred from electronic annotation /// 0007067 // mitosis // inferred from electronic annotation /// 0051301 // cell division // inferred from electronic annotation	0005634 // nucleus // inferred from electronic annotation	0005488 // binding // inferred from electronic annotation /// 0005515 // protein binding // inferred from electronic annotation	8.5525	8.20944	8.20566	9.79655	9.86431	9.76559	9.41721	9.41721	9.22999	9.80882	8.32253	9.3548
1455351_at	RIKEN cDNA 2610101N10 gene	2610101N10Rik	252.968	90.8006	2.78598	0.00430444	Yes	No	0006396 // RNA processing // inferred from electronic annotation	---	0000166 // nucleotide binding // inferred from electronic annotation /// 0003676 // nucleic acid binding // inferred from electronic annotation /// 0003723 // RNA binding // inferred from electronic annotation	6.59851	6.49284	6.42254	7.98127	8.10463	7.86254	8.27626	8.5004	8.02962	7.98281	6.50463	8.26876
1429911_at	microcephaly, primary autosomal recessive 1	Mcph1	215.651	77.4579	2.7841	0.00492234	Yes	No	---	0005622 // intracellular // inferred from electronic annotation /// 0005813 // centrosome // inferred from electronic annotation	---	6.29026	6.20341	6.33235	7.9577	7.72774	7.57222	7.49093	7.33277	7.16842	7.75255	6.27534	7.33071
1433718_a_at	chromobox homolog 1 (Drosophila HP1 beta)	Cbx1	437.99	157.38	2.783	0.00482724	Yes	No	0006333 // chromatin assembly or disassembly // inferred from electronic annotation	0000785 // chromatin // inferred from direct assay /// 0000785 // chromatin // inferred from electronic annotation /// 0001939 // female pronucleus // inferred from direct assay /// 0001940 // male pronucleus // inferred from direct assay /// 0005634 // nucleus // inferred from electronic annotation /// 0005721 // centromeric heterochromatin // inferred from direct assay /// 0010369 // chromocent…	0003682 // chromatin binding // inferred from electronic annotation /// 0005515 // protein binding // inferred from physical interaction /// 0042802 // identical protein binding // inferred from physical interaction	7.41486	7.11813	7.36134	8.78289	8.89566	8.64571	8.93574	8.64571	8.47984	8.77475	7.29811	8.6871
1426999_at	zinc finger CCCH type containing 14	Zc3h14	1409.53	512.091	2.7525	0.00446103	Yes	No	---	0005634 // nucleus // inferred from electronic annotation	0003676 // nucleic acid binding // inferred from electronic annotation /// 0003723 // RNA binding // inferred from electronic annotation /// 0008270 // zinc ion binding // inferred from electronic annotation /// 0046872 // metal ion binding // inferred from electronic annotation	9.00842	8.83231	9.16004	10.4571	10.4132	10.5127	9.39907	9.5041	9.43284	10.461	9.00026	9.44534
1424222_s_at	RAD23b homolog (S. cerevisiae)	Rad23b	1225.74	445.338	2.75237	0.00470066	Yes	No	0006281 // DNA repair // inferred from electronic annotation /// 0006289 // nucleotide-excision repair // inferred from electronic annotation /// 0006464 // protein modification process // inferred from electronic annotation /// 0006511 // ubiquitin-dependent protein catabolic process // inferred from electronic annotation /// 0006974 // response to DNA damage stimulus // inferred from direct ass…	0005634 // nucleus // inferred from electronic annotation /// 0005737 // cytoplasm // inferred from electronic annotation /// 0005829 // cytosol // inferred from electronic annotation /// 0043234 // protein complex // inferred from electronic annotation	0003684 // damaged DNA binding // inferred from electronic annotation /// 0005515 // protein binding // inferred from electronic annotation	8.85491	8.68344	8.85792	10.2936	10.0786	10.4061	10.3603	10.3449	9.18233	10.2594	8.79876	9.96251
1417454_at	cullin 4B	Cul4b	1554.35	565.458	2.74884	0.00430444	Yes	No	0006511 // ubiquitin-dependent protein catabolic process // inferred from electronic annotation	0031461 // cullin-RING ubiquitin ligase complex // inferred from electronic annotation	0031625 // ubiquitin protein ligase binding // inferred from electronic annotation	9.21087	9.00376	9.2152	10.4975	10.6906	10.6182	10.1745	10.1745	10.0348	10.6021	9.14328	10.1279
1416925_at	karyopherin (importin) beta 1	Kpnb1	1383.81	512.028	2.70261	0.00414948	Yes	No	0000059 // protein import into nucleus, docking // inferred from electronic annotation /// 0006606 // protein import into nucleus // inferred from direct assay /// 0006606 // protein import into nucleus // not recorded /// 0006610 // ribosomal protein import into nucleus // inferred from direct assay /// 0006810 // transport // inferred from electronic annotation /// 0006886 // intracellular prot…	0005634 // nucleus // inferred from electronic annotation /// 0005635 // nuclear envelope // inferred from electronic annotation /// 0005643 // nuclear pore // inferred from electronic annotation /// 0005737 // cytoplasm // inferred from electronic annotation	0005488 // binding // inferred from electronic annotation /// 0005515 // protein binding // inferred from physical interaction /// 0005515 // protein binding // not recorded /// 0005515 // protein binding // inferred from electronic annotation /// 0008565 // protein transporter activity // inferred from direct assay /// 0008565 // protein transporter activity // inferred from electronic annotatio…	8.92935	9.11468	8.95621	10.3998	10.5168	10.3867	10.7299	10.6645	9.93589	10.4344	9.00008	10.4434
1423076_at	sorting nexin 9	Snx9	466.745	172.761	2.70168	0.00470066	Yes	No	0006810 // transport // inferred from electronic annotation /// 0006886 // intracellular protein transport // inferred from mutant phenotype /// 0007154 // cell communication // inferred from electronic annotation /// 0015031 // protein transport // inferred from electronic annotation	0005625 // soluble fraction // inferred from direct assay /// 0005737 // cytoplasm // inferred from direct assay /// 0005792 // microsome // inferred from direct assay /// 0005886 // plasma membrane // inferred from direct assay	0005515 // protein binding // inferred from physical interaction /// 0005515 // protein binding // inferred from electronic annotation /// 0035091 // phosphoinositide binding // inferred from direct assay /// 0035091 // phosphoinositide binding // inferred from electronic annotation	7.52321	7.29354	7.48115	9.01638	8.85619	8.7269	7.95567	7.85867	7.95567	8.86649	7.43263	7.92334
1428323_at	glycerol phosphate dehydrogenase 2, mitochondrial	Gpd2	179.989	66.7141	2.69791	0.00470066	Yes	No	0006072 // glycerol-3-phosphate metabolic process // inferred from mutant phenotype /// 0006072 // glycerol-3-phosphate metabolic process // inferred from electronic annotation /// 0006094 // gluconeogenesis // inferred from mutant phenotype /// 0055114 // oxidation reduction // inferred from electronic annotation	0005739 // mitochondrion // inferred from direct assay /// 0005739 // mitochondrion // inferred from electronic annotation /// 0005743 // mitochondrial inner membrane // inferred from direct assay /// 0005743 // mitochondrial inner membrane // inferred from electronic annotation /// 0009331 // glycerol-3-phosphate dehydrogenase complex // traceable author statement /// 0009331 // glycerol-3-phosp…	0004368 // glycerol-3-phosphate dehydrogenase activity // inferred from electronic annotation /// 0005509 // calcium ion binding // inferred from electronic annotation /// 0016491 // oxidoreductase activity // inferred from electronic annotation	6.15729	6.12173	5.90074	7.5034	7.35654	7.61535	7.4703	7.26199	6.97015	7.49176	6.05992	7.23415
1438767_at	oncostatin M	Osm	609.334	226.314	2.69243	0.00486386	Yes	No	0001558 // regulation of cell growth // inferred from electronic annotation /// 0006915 // apoptosis // inferred from direct assay /// 0006955 // immune response // inferred from electronic annotation /// 0007422 // peripheral nervous system development // inferred from mutant phenotype /// 0009408 // response to heat // inferred from mutant phenotype /// 0033138 // positive regulation of peptidy…	0005576 // extracellular region // inferred from electronic annotation /// 0005615 // extracellular space // inferred from electronic annotation	0005125 // cytokine activity // inferred from direct assay /// 0005125 // cytokine activity // inferred from electronic annotation	7.86675	7.65012	7.94968	9.23633	9.13894	9.378	7.10639	7.41748	7.03825	9.25109	7.82218	7.18737
1437362_at	coiled-coil domain containing 76	Ccdc76	207.134	77.079	2.6873	0.0039133	Yes	No	0008033 // tRNA processing // inferred from electronic annotation	---	0008168 // methyltransferase activity // inferred from electronic annotation /// 0016740 // transferase activity // inferred from electronic annotation	6.19889	6.36994	6.23597	7.63594	7.71682	7.73051	7.95168	8.20713	7.31202	7.69442	6.26827	7.82361
1416998_at	RRS1 ribosome biogenesis regulator homolog (S. cerevisiae)	Rrs1	566.33	211.973	2.67171	0.00459075	Yes	No	0042254 // ribosome biogenesis // inferred from electronic annotation	0005634 // nucleus // inferred from electronic annotation	---	7.84497	7.56006	7.77818	9.16189	9.0497	9.22491	9.3944	9.33696	8.81885	9.1455	7.72774	9.1834
1439802_at	serine/threonine kinase 35	Stk35	63.9316	23.9616	2.66809	0.00476976	Yes	No	0006468 // protein amino acid phosphorylation // inferred from electronic annotation	0005634 // nucleus // inferred from electronic annotation /// 0005737 // cytoplasm // inferred from electronic annotation	0000166 // nucleotide binding // inferred from electronic annotation /// 0004672 // protein kinase activity // inferred from electronic annotation /// 0004674 // protein serine/threonine kinase activity // inferred from electronic annotation /// 0005524 // ATP binding // inferred from electronic annotation /// 0016301 // kinase activity // inferred from electronic annotation /// 0016740 // transf…	4.71837	4.39561	4.63397	6.00778	6.08237	5.90522	5.70417	5.42564	5.42564	5.99846	4.58265	5.51848
1418039_at	RAB, member of RAS oncogene family-like 3	Rabl3	427.396	161.045	2.6539	0.00278337	Yes	No	0007264 // small GTPase mediated signal transduction // inferred from electronic annotation	0005622 // intracellular // inferred from electronic annotation	0000166 // nucleotide binding // inferred from electronic annotation /// 0005525 // GTP binding // inferred from electronic annotation	7.32812	7.26609	7.39974	8.77183	8.70002	8.74644	8.29527	8.23846	8.0156	8.73943	7.33132	8.18311
1459977_x_at	COX10 homolog, cytochrome c oxidase assembly protein, heme A: farnesyltransferas	Cox10	27.4177	10.3503	2.64899	0.00424039	Yes	No	0000266 // mitochondrial fission // inferred from mutant phenotype /// 0006783 // heme biosynthetic process // inferred from electronic annotation /// 0006784 // heme a biosynthetic process // inferred from direct assay /// 0006784 // heme a biosynthetic process // inferred from mutant phenotype /// 0006784 // heme a biosynthetic process // inferred from electronic annotation /// 0007005 // mitoc…	0005739 // mitochondrion // inferred from direct assay /// 0005739 // mitochondrion // not recorded /// 0005739 // mitochondrion // inferred from electronic annotation /// 0016020 // membrane // inferred from electronic annotation /// 0016021 // integral to membrane // inferred from electronic annotation /// 0031966 // mitochondrial membrane // inferred from electronic annotation	0004129 // cytochrome-c oxidase activity // inferred from electronic annotation /// 0004311 // farnesyltranstransferase activity // not recorded /// 0004659 // prenyltransferase activity // inferred from electronic annotation /// 0008495 // protoheme IX farnesyltransferase activity // inferred from electronic annotation /// 0016740 // transferase activity // inferred from electronic annotation	3.43519	3.28203	3.39757	4.77857	4.88307	4.66947	4.78542	5.00313	4.93411	4.77704	3.3716	4.90755
1436297_a_at	glutamate receptor, ionotropic, N-methyl D-aspartate-associated protein 1 (gluta	Grina	956.097	361.781	2.64275	0.00248757	Yes	No	0043066 // negative regulation of apoptosis // inferred from electronic annotation	0016020 // membrane // inferred from electronic annotation /// 0016021 // integral to membrane // inferred from electronic annotation	---	8.46058	8.47945	8.55689	9.89818	9.87332	9.93154	9.2177	9.31295	9.47938	9.90101	8.49897	9.33668
1441212_at	family with sequence similarity 92, member A	Fam92a	35.4422	13.4312	2.6388	0.00430444	Yes	No	---	---	0005515 // protein binding // inferred from physical interaction	3.64802	3.85483	3.7397	5.11206	5.26481	5.06532	4.23972	4.01854	4.23972	5.1474	3.74752	4.16599
1452831_s_at	phosphoribosyl pyrophosphate amidotransferase	Ppat	688.769	263.136	2.61754	0.00486386	Yes	No	0008152 // metabolic process // inferred from electronic annotation /// 0009113 // purine base biosynthetic process // inferred from electronic annotation /// 0009116 // nucleoside metabolic process // inferred from electronic annotation	---	0004044 // amidophosphoribosyltransferase activity // inferred from electronic annotation /// 0016740 // transferase activity // inferred from electronic annotation	8.22213	7.86572	8.03114	9.49913	9.36712	9.41738	8.72196	8.67371	8.54257	9.42788	8.03966	8.64608
1426933_at	oxidative-stress responsive 1	Oxsr1	540.688	207.575	2.60479	0.00440516	Yes	No	0006468 // protein amino acid phosphorylation // inferred from electronic annotation /// 0006468 // protein amino acid phosphorylation // inferred from sequence or structural similarity /// 0006979 // response to oxidative stress // inferred from direct assay /// 0007243 // protein kinase cascade // inferred from sequence or structural similarity /// 0007243 // protein kinase cascade // inferred …	---	0000166 // nucleotide binding // inferred from electronic annotation /// 0000287 // magnesium ion binding // inferred from electronic annotation /// 0000287 // magnesium ion binding // inferred from sequence or structural similarity /// 0004672 // protein kinase activity // inferred from electronic annotation /// 0004674 // protein serine/threonine kinase activity // inferred from electronic anno…	7.85304	7.61732	7.6221	8.99119	9.15961	9.08516	9.11073	9.00847	8.69243	9.07865	7.69749	8.93721
1460711_at	DnaJ (Hsp40) homolog, subfamily C, member 21	Dnajc21	748.724	288.921	2.59145	0.00492234	Yes	No	---	---	0031072 // heat shock protein binding // inferred from electronic annotation	8.15637	8.03778	8.32944	9.67932	9.5345	9.43105	8.1843	7.92161	8.38992	9.54829	8.17453	8.16528
1453045_at	coiled-coil domain containing 41	Ccdc41	586.417	226.873	2.58478	0.0046807	Yes	No	---	---	---	7.76543	7.71473	7.99706	9.3034	9.13957	9.14438	8.57853	8.39771	8.27108	9.19578	7.82574	8.41577
1428287_at	cullin 5	Cul5	235.32	91.1375	2.58203	0.00492234	Yes	No	0006511 // ubiquitin-dependent protein catabolic process // inferred from electronic annotation	0031461 // cullin-RING ubiquitin ligase complex // inferred from electronic annotation	0005515 // protein binding // inferred from physical interaction /// 0005515 // protein binding // inferred from electronic annotation /// 0031625 // ubiquitin protein ligase binding // inferred from electronic annotation	6.66205	6.34672	6.52115	7.88501	7.98196	7.76847	7.23589	7.23589	7.10068	7.87848	6.50997	7.19082
1420472_at	myotrophin	Mtpn	148.689	57.7091	2.57652	0.00459075	Yes	No	0006584 // catecholamine metabolic process // inferred from electronic annotation /// 0021707 // cerebellar granule cell differentiation // inferred from electronic annotation /// 0043403 // skeletal muscle regeneration // inferred from electronic annotation /// 0051146 // striated muscle cell differentiation // inferred from electronic annotation	0005622 // intracellular // inferred from electronic annotation /// 0005737 // cytoplasm // inferred from electronic annotation /// 0030424 // axon // inferred from electronic annotation	---	5.91771	5.96034	5.67413	7.1417	7.25068	7.25607	5.89174	5.61605	5.62996	7.21615	5.85073	5.71258
1428582_at	methyltransferase like 10	Mettl10	612.966	238.438	2.57075	0.00440516	Yes	No	0008152 // metabolic process // inferred from electronic annotation	---	0008168 // methyltransferase activity // inferred from electronic annotation /// 0016740 // transferase activity // inferred from electronic annotation	7.83522	7.82271	8.03449	9.35521	9.16274	9.26104	7.6626	7.64405	7.28553	9.25966	7.89747	7.53073
1432304_a_at	RIKEN cDNA 9030624J02 gene	9030624J02Rik	38.4075	14.954	2.56838	0.00430444	Yes	No	---	0016020 // membrane // inferred from electronic annotation /// 0016021 // integral to membrane // inferred from electronic annotation	---	3.85363	3.95987	3.89387	5.12161	5.39182	5.27652	4.2887	3.95915	4.28587	5.26332	3.90246	4.17791
1425498_at	PRP4 pre-mRNA processing factor 4 homolog B (yeast)	Prpf4b	812.712	316.589	2.56709	0.00424039	Yes	No	0006397 // mRNA processing // inferred from electronic annotation /// 0006468 // protein amino acid phosphorylation // inferred from electronic annotation /// 0008380 // RNA splicing // inferred from electronic annotation	0005634 // nucleus // inferred from electronic annotation /// 0005681 // spliceosome // inferred from electronic annotation /// 0005694 // chromosome // inferred from direct assay	0000166 // nucleotide binding // inferred from electronic annotation /// 0004672 // protein kinase activity // inferred from sequence or structural similarity /// 0004672 // protein kinase activity // inferred from electronic annotation /// 0004674 // protein serine/threonine kinase activity // inferred from electronic annotation /// 0005524 // ATP binding // inferred from electronic annotation /…	8.2738	8.25937	8.38623	9.54552	9.7507	9.70358	8.99129	8.90343	8.77594	9.6666	8.30647	8.89022
1452937_s_at	coiled coil domain containing 28B	Ccdc28b	136.77	53.6215	2.55066	0.00424039	Yes	No	---	---	---	5.83998	5.70543	5.68881	7.18327	7.10625	6.99731	6.39874	6.31596	5.54592	7.09561	5.74474	6.08687
1416376_at	transmembrane protein 97	Tmem97	141.234	55.3954	2.54956	0.00440516	Yes	No	---	0016020 // membrane // inferred from electronic annotation /// 0016021 // integral to membrane // inferred from electronic annotation	---	5.7937	5.7937	5.78768	7.31772	7.01768	7.09043	5.33481	5.38705	5.49525	7.14194	5.79169	5.4057
1460551_at	similar to RAN, member RAS oncogene family /// RAN, member RAS oncogene family	LOC100045999 /// Ran	1024.72	403.736	2.53809	0.00467884	Yes	No	0006606 // protein import into nucleus // inferred from direct assay /// 0006810 // transport // inferred from electronic annotation /// 0006886 // intracellular protein transport // inferred from electronic annotation /// 0006913 // nucleocytoplasmic transport // inferred from electronic annotation /// 0007165 // signal transduction // inferred from electronic annotation /// 0007264 // small GTP…	0005634 // nucleus // inferred from electronic annotation /// 0005737 // cytoplasm // inferred from electronic annotation /// 0042470 // melanosome // inferred from electronic annotation	0000166 // nucleotide binding // inferred from electronic annotation /// 0003924 // GTPase activity // inferred from electronic annotation /// 0005515 // protein binding // inferred from physical interaction /// 0005515 // protein binding // inferred from electronic annotation /// 0005525 // GTP binding // inferred from electronic annotation	8.74484	8.61944	8.60752	9.82873	10.1155	10.0588	9.57314	9.42638	8.64836	10.001	8.65727	9.21596
1434821_at	bromodomain containing 1 /// similar to bromodomain containing 1	Brd1 /// LOC100045983	580.306	228.79	2.53641	0.00430444	Yes	No	---	0005634 // nucleus // not recorded	0005515 // protein binding // inferred from electronic annotation /// 0008270 // zinc ion binding // inferred from electronic annotation /// 0046872 // metal ion binding // inferred from electronic annotation	7.9621	7.6994	7.85214	9.16389	9.1434	9.23472	9.49858	9.45429	8.91883	9.18067	7.83788	9.29057
1426275_a_at	UDP-glucuronate decarboxylase 1	Uxs1	229.546	90.8768	2.5259	0.00492234	Yes	No	0008152 // metabolic process // inferred from electronic annotation /// 0044237 // cellular metabolic process // inferred from electronic annotation	0005794 // Golgi apparatus // inferred from electronic annotation /// 0016020 // membrane // inferred from electronic annotation /// 0016021 // integral to membrane // inferred from electronic annotation	0003824 // catalytic activity // inferred from electronic annotation /// 0005488 // binding // inferred from electronic annotation /// 0016829 // lyase activity // inferred from electronic annotation /// 0016831 // carboxy-lyase activity // inferred from electronic annotation /// 0048040 // UDP-glucuronate decarboxylase activity // inferred from electronic annotation /// 0050662 // coenzyme bindi…	6.37299	6.66405	6.48048	7.88983	7.71201	7.92608	6.77399	6.53539	6.86683	7.84264	6.50584	6.7254
1416665_at	demethyl-Q 7	Coq7	512.663	203.815	2.51533	0.00496477	Yes	No	0006744 // ubiquinone biosynthetic process // inferred from electronic annotation /// 0019538 // protein metabolic process // inferred from electronic annotation	0005634 // nucleus // inferred from electronic annotation /// 0005739 // mitochondrion // inferred from direct assay	0005506 // iron ion binding // inferred from electronic annotation /// 0016491 // oxidoreductase activity // inferred from electronic annotation /// 0046872 // metal ion binding // inferred from electronic annotation /// 0046914 // transition metal ion binding // inferred from electronic annotation	7.68833	7.58324	7.74178	9.18699	8.96808	8.85053	8.1296	7.66001	7.54448	9.00187	7.67112	7.77803
1447442_at	---	---	224.286	89.57	2.50403	0.00446103	Yes	No	---	---	---	6.42145	6.38139	6.65199	7.84856	7.7494	7.82962	8.97166	9.19686	8.31782	7.80919	6.48494	8.82878
1424377_at	cDNA sequence BC003885 /// predicted gene, EG623867	BC003885 /// EG623867	639.396	259.583	2.46317	0.00479465	Yes	No	0006412 // translation // inferred from electronic annotation /// 0042254 // ribosome biogenesis // inferred from electronic annotation	0005622 // intracellular // inferred from electronic annotation /// 0005634 // nucleus // inferred from electronic annotation /// 0005840 // ribosome // inferred from electronic annotation	0003735 // structural constituent of ribosome // inferred from electronic annotation	8.13326	7.9715	7.9554	9.3386	9.45744	9.16566	8.81487	8.80937	8.62475	9.32057	8.02005	8.74966
1415881_at	growth hormone inducible transmembrane protein	Ghitm	971.722	396.41	2.4513	0.00497381	Yes	No	---	0005739 // mitochondrion // inferred from electronic annotation /// 0016020 // membrane // inferred from electronic annotation /// 0016021 // integral to membrane // inferred from electronic annotation	---	8.78462	8.49286	8.61507	9.84237	9.87963	10.0512	8.92721	8.72373	8.44758	9.9244	8.63085	8.69951
1430133_at	TBC1 domain family, member 8B	Tbc1d8b	487.374	201.363	2.42037	0.0046807	Yes	No	0032313 // regulation of Rab GTPase activity // inferred from electronic annotation	0005622 // intracellular // inferred from electronic annotation	0005096 // GTPase activator activity // inferred from electronic annotation /// 0005097 // Rab GTPase activator activity // inferred from electronic annotation /// 0005509 // calcium ion binding // inferred from electronic annotation	7.51825	7.66487	7.77785	8.92786	8.83052	9.02828	9.23672	9.00092	8.53179	8.92889	7.65366	8.92314
1426460_a_at	UDP-glucose pyrophosphorylase 2	Ugp2	187.915	78.4806	2.39442	0.00458143	Yes	No	0008152 // metabolic process // inferred from electronic annotation	0005737 // cytoplasm // inferred from electronic annotation	0003983 // UTP:glucose-1-phosphate uridylyltransferase activity // inferred from electronic annotation /// 0005515 // protein binding // inferred from electronic annotation /// 0016740 // transferase activity // inferred from electronic annotation /// 0016779 // nucleotidyltransferase activity // inferred from electronic annotation	6.40798	6.2389	6.23591	7.6177	7.62219	7.42193	6.85547	6.71163	6.77884	7.55394	6.29426	6.78198
1456846_at	predicted gene, EG382639	EG382639	802.876	337.039	2.38214	0.0046807	Yes	No	---	0005622 // intracellular // inferred from electronic annotation	0003676 // nucleic acid binding // inferred from electronic annotation /// 0008270 // zinc ion binding // inferred from electronic annotation	8.53481	8.2876	8.36791	9.71702	9.53167	9.69841	8.84069	8.52276	8.30304	9.64903	8.39677	8.5555
1445402_at	---	---	43.9441	18.4554	2.3811	0.00430444	Yes	No	---	---	---	4.1645	4.2085	4.24491	5.33023	5.47185	5.57071	5.01779	5.42681	5.09616	5.4576	4.20597	5.18025
1454680_at	DNA segment, Chr 5, ERATO Doi 579, expressed	D5Ertd579e	402.138	169.759	2.36887	0.00440516	Yes	No	---	---	0000166 // nucleotide binding // inferred from electronic annotation /// 0005524 // ATP binding // inferred from electronic annotation	7.41451	7.26819	7.53934	8.61036	8.67214	8.67214	9.66697	9.76933	9.00683	8.65155	7.40735	9.48104
1430258_at	RIKEN cDNA 2810422J05 gene	2810422J05Rik	67.5906	28.5385	2.3684	0.00487953	Yes	No	---	---	---	4.84928	4.69732	4.95792	5.97588	6.06483	6.19554	6.13651	6.18352	5.89322	6.07875	4.83484	6.07108
1419924_at	Folliculin interacting protein 1, mRNA (cDNA clone MGC:100017 IMAGE:30543296)	Fnip1	30.4982	12.8907	2.36591	0.00332279	Yes	No	---	0005737 // cytoplasm // inferred from electronic annotation	---	3.73707	3.65493	3.67277	4.94266	4.99391	4.85538	5.36775	5.56806	5.04224	4.93065	3.68826	5.32602
1448033_at	TatD DNase domain containing 1	Tatdn1	105.922	44.8072	2.36395	0.0046807	Yes	No	---	0005634 // nucleus // inferred from electronic annotation	0004518 // nuclease activity // inferred from electronic annotation /// 0016787 // hydrolase activity // inferred from electronic annotation /// 0016888 // endodeoxyribonuclease activity, producing 5'-phosphomonoesters // inferred from electronic annotation	5.37111	5.45496	5.63091	6.67086	6.82658	6.68314	5.24278	5.45889	5.04083	6.72686	5.48566	5.2475
1428693_at	RIKEN cDNA 2610044O15 gene	2610044O15Rik	36.5732	15.5008	2.35944	0.0046807	Yes	No	0006355 // regulation of transcription, DNA-dependent // inferred from electronic annotation	0005622 // intracellular // inferred from electronic annotation	0003676 // nucleic acid binding // inferred from electronic annotation	4.07863	3.96538	3.81881	5.1366	5.29361	5.14794	4.78397	4.78397	4.71581	5.19272	3.95427	4.76125
1424390_at	nucleoporin like 1	Nupl1	707.899	300.325	2.35711	0.00446103	Yes	No	0006810 // transport // inferred from electronic annotation /// 0015031 // protein transport // inferred from electronic annotation /// 0051028 // mRNA transport // inferred from electronic annotation /// 0065002 // intracellular protein transmembrane transport // inferred from electronic annotation	0005634 // nucleus // inferred from electronic annotation /// 0005643 // nuclear pore // inferred from electronic annotation /// 0016020 // membrane // inferred from electronic annotation /// 0031965 // nuclear membrane // inferred from electronic annotation	0005515 // protein binding // inferred from physical interaction	8.23	8.26171	8.19943	9.48484	9.31741	9.59995	8.53203	8.55129	8.31347	9.4674	8.23038	8.4656
1439074_a_at	Son DNA binding protein	Son	131.049	57.0982	2.29515	0.00430444	Yes	No	0006916 // anti-apoptosis // inferred from electronic annotation	0005622 // intracellular // inferred from electronic annotation /// 0005634 // nucleus // inferred from electronic annotation	0003676 // nucleic acid binding // inferred from electronic annotation /// 0003677 // DNA binding // inferred from electronic annotation /// 0003723 // RNA binding // inferred from electronic annotation /// 0003725 // double-stranded RNA binding // inferred from electronic annotation /// 0005515 // protein binding // inferred from physical interaction /// 0005515 // protein binding // inferred fr…	5.85094	5.71232	5.94286	7.07723	7.01901	7.00564	5.68545	5.27253	5.91637	7.03396	5.83537	5.62478
1451343_at	vacuolar protein sorting 36 (yeast)	Vps36	647.523	287.914	2.24902	0.00440516	Yes	No	0006350 // transcription // inferred from electronic annotation /// 0006355 // regulation of transcription, DNA-dependent // inferred from electronic annotation /// 0006810 // transport // inferred from electronic annotation /// 0015031 // protein transport // inferred from electronic annotation /// 0016197 // endosome transport // inferred by curator	0005634 // nucleus // inferred from electronic annotation /// 0005737 // cytoplasm // inferred from electronic annotation /// 0005764 // lysosome // inferred from direct assay /// 0005768 // endosome // inferred from electronic annotation /// 0005770 // late endosome // inferred from direct assay /// 0005770 // late endosome // inferred from electronic annotation	0008289 // lipid binding // inferred from electronic annotation /// 0043130 // ubiquitin binding // inferred from direct assay	8.09316	8.20766	8.20766	9.28843	9.47062	9.25731	7.86488	7.96853	7.83465	9.33879	8.16949	7.88935
1436828_a_at	tumor protein D52-like 2	Tpd52l2	433.584	193.235	2.24381	0.00482724	Yes	No	---	0005737 // cytoplasm // inferred from sequence or structural similarity /// 0048471 // perinuclear region of cytoplasm // inferred from sequence or structural similarity	0005515 // protein binding // inferred from sequence or structural similarity /// 0042803 // protein homodimerization activity // inferred from sequence or structural similarity /// 0046982 // protein heterodimerization activity // inferred from sequence or structural similarity	7.62417	7.45137	7.7071	8.85426	8.67216	8.75408	7.26103	7.03192	7.09867	8.76017	7.59421	7.13054
1416031_s_at	minichromosome maintenance deficient 7 (S. cerevisiae)	Mcm7	1368.71	615.023	2.22546	0.00476976	Yes	No	0006260 // DNA replication // inferred from electronic annotation /// 0006268 // DNA unwinding during replication // inferred from physical interaction /// 0006270 // DNA replication initiation // inferred from electronic annotation /// 0006350 // transcription // inferred from electronic annotation /// 0006355 // regulation of transcription, DNA-dependent // inferred from electronic annotation /…	0005634 // nucleus // inferred from direct assay /// 0005634 // nucleus // inferred from electronic annotation	0000166 // nucleotide binding // inferred from electronic annotation /// 0003677 // DNA binding // inferred from electronic annotation /// 0003678 // DNA helicase activity // inferred from physical interaction /// 0003697 // single-stranded DNA binding // inferred from physical interaction /// 0005515 // protein binding // inferred from physical interaction /// 0005524 // ATP binding // inferred …	9.3496	9.27813	9.16576	10.5483	10.2987	10.4088	9.95156	9.41157	9.34647	10.4186	9.2645	9.56987
1419253_at	methylenetetrahydrofolate dehydrogenase (NAD+ dependent), methenyltetrahydrofola	Mthfd2	1090.32	490.932	2.22091	0.00430444	Yes	No	0006730 // one-carbon compound metabolic process // inferred from electronic annotation /// 0008152 // metabolic process // inferred from electronic annotation /// 0009396 // folic acid and derivative biosynthetic process // inferred from electronic annotation /// 0046653 // tetrahydrofolate metabolic process // inferred from electronic annotation /// 0055114 // oxidation reduction // inferred fr…	0005739 // mitochondrion // inferred from direct assay /// 0005739 // mitochondrion // inferred from electronic annotation	0000287 // magnesium ion binding // inferred from electronic annotation /// 0003824 // catalytic activity // inferred from electronic annotation /// 0004477 // methenyltetrahydrofolate cyclohydrolase activity // inferred from electronic annotation /// 0004487 // methylenetetrahydrofolate dehydrogenase (NAD+) activity // inferred from electronic annotation /// 0004488 // methylenetetrahydrofolate …	8.9025	8.89415	9.02149	10.2005	10.0575	10.0136	9.92915	9.84464	9.70275	10.0905	8.93938	9.82551
1438510_a_at	histidyl-tRNA synthetase	Hars	2663.61	1215.78	2.19086	0.00459075	Yes	No	0006412 // translation // inferred from electronic annotation /// 0006418 // tRNA aminoacylation for protein translation // inferred from electronic annotation /// 0006427 // histidyl-tRNA aminoacylation // inferred from electronic annotation	0005737 // cytoplasm // inferred from electronic annotation	0000166 // nucleotide binding // inferred from electronic annotation /// 0004812 // aminoacyl-tRNA ligase activity // inferred from electronic annotation /// 0004821 // histidine-tRNA ligase activity // inferred from electronic annotation /// 0005524 // ATP binding // inferred from electronic annotation /// 0016874 // ligase activity // inferred from electronic annotation	10.3059	10.1745	10.2626	11.4274	11.4695	11.2406	10.6291	10.4923	10.8818	11.3792	10.2477	10.6677
1438032_at	leucine-rich repeats and calponin homology (CH) domain containing 1	Lrch1	367.026	169.089	2.17061	0.00492234	Yes	No	---	---	0005515 // protein binding // inferred from electronic annotation /// 0009055 // electron carrier activity // inferred from electronic annotation /// 0051536 // iron-sulfur cluster binding // inferred from electronic annotation	7.33277	7.36987	7.50228	8.40711	8.65873	8.49338	8.2528	8.24735	8.3084	8.51974	7.40164	8.26952
1455611_at	protein inhibitor of activated STAT 1	Pias1	271.731	125.394	2.16701	0.00476976	Yes	No	0006350 // transcription // inferred from electronic annotation /// 0006355 // regulation of transcription, DNA-dependent // inferred from electronic annotation /// 0006511 // ubiquitin-dependent protein catabolic process // inferred from electronic annotation /// 0007259 // JAK-STAT cascade // not recorded	0005634 // nucleus // inferred from electronic annotation /// 0016607 // nuclear speck // inferred from electronic annotation	0003676 // nucleic acid binding // inferred from electronic annotation /// 0003677 // DNA binding // inferred from electronic annotation /// 0003714 // transcription corepressor activity // not recorded /// 0005515 // protein binding // inferred from electronic annotation /// 0008270 // zinc ion binding // inferred from electronic annotation /// 0046872 // metal ion binding // inferred from elect…	7.10475	6.98613	6.8201	8.10774	8.11852	8.03184	7.72529	7.57193	7.29766	8.08603	6.97033	7.53163
1417200_at	transmembrane protein 183A	Tmem183a	737.32	353.629	2.08501	0.00459075	Yes	No	---	0016020 // membrane // inferred from electronic annotation /// 0016021 // integral to membrane // inferred from electronic annotation	---	8.53838	8.32129	8.53861	9.50518	9.50762	9.56564	8.91829	8.70976	8.62842	9.52615	8.46609	8.75216
1449661_at	Suppressor of zeste 12 homolog (Drosophila), mRNA (cDNA clone IMAGE:3485208)	Suz12	26.2907	12.6431	2.07946	0.00430444	Yes	No	0000122 // negative regulation of transcription from RNA polymerase II promoter // inferred from mutant phenotype /// 0006350 // transcription // inferred from electronic annotation /// 0006355 // regulation of transcription, DNA-dependent // inferred from electronic annotation /// 0008284 // positive regulation of cell proliferation // inferred from mutant phenotype /// 0016568 // chromatin modi…	0001739 // sex chromatin // inferred from direct assay /// 0005622 // intracellular // inferred from electronic annotation /// 0005634 // nucleus // inferred from electronic annotation /// 0035098 // ESC/E(Z) complex // not recorded /// 0035098 // ESC/E(Z) complex // inferred from electronic annotation	0003682 // chromatin binding // inferred from direct assay /// 0008270 // zinc ion binding // inferred from electronic annotation /// 0042054 // histone methyltransferase activity // not recorded /// 0042054 // histone methyltransferase activity // inferred from electronic annotation /// 0046872 // metal ion binding // inferred from electronic annotation	3.53377	3.72576	3.7213	4.67535	4.73705	4.73705	5.79984	5.12573	5.48937	4.71648	3.66028	5.47165
1419193_a_at	glia maturation factor, gamma	Gmfg	1017.53	492.172	2.06742	0.00430444	Yes	No	---	0005622 // intracellular // inferred from electronic annotation	0003779 // actin binding // inferred from electronic annotation /// 0008083 // growth factor activity // inferred from electronic annotation	8.94596	8.94041	8.94269	10.1051	9.97806	9.8894	8.94738	8.74269	8.08717	9.99085	8.94302	8.59241
1419996_s_at	aryl hydrocarbon receptor nuclear translocator	Arnt	273.426	133.756	2.04421	0.00417426	Yes	No	0000160 // two-component signal transduction system (phosphorelay) // inferred from electronic annotation /// 0001892 // embryonic placenta development // inferred from mutant phenotype /// 0006350 // transcription // inferred from electronic annotation /// 0006355 // regulation of transcription, DNA-dependent // inferred from electronic annotation /// 0007165 // signal transduction // inferred f…	0005634 // nucleus // inferred from direct assay /// 0005634 // nucleus // inferred from electronic annotation /// 0005667 // transcription factor complex // inferred from direct assay /// 0005667 // transcription factor complex // traceable author statement /// 0005737 // cytoplasm // inferred from direct assay	0000155 // two-component sensor activity // inferred from electronic annotation /// 0003677 // DNA binding // inferred from genetic interaction /// 0003677 // DNA binding // inferred from electronic annotation /// 0003700 // transcription factor activity // traceable author statement /// 0003700 // transcription factor activity // inferred from electronic annotation /// 0003713 // transcription c…	7.13447	6.99035	7.06556	8.11751	8.03059	8.13692	7.75	7.77724	7.44028	8.09501	7.06346	7.65584
1419819_s_at	SEC63-like (S. cerevisiae)	Sec63	438.175	214.35	2.0442	0.00397645	Yes	No	0006457 // protein folding // inferred from electronic annotation /// 0006810 // transport // inferred from electronic annotation /// 0015031 // protein transport // inferred from electronic annotation	0005783 // endoplasmic reticulum // inferred from electronic annotation /// 0005789 // endoplasmic reticulum membrane // inferred from electronic annotation /// 0016020 // membrane // inferred from electronic annotation /// 0016021 // integral to membrane // inferred from electronic annotation	0031072 // heat shock protein binding // inferred from electronic annotation /// 0051082 // unfolded protein binding // inferred from electronic annotation	7.81159	7.67843	7.74146	8.82063	8.77514	8.73032	8.39851	8.59848	7.43887	8.77536	7.74383	8.14529
1448816_at	prostaglandin I2 (prostacyclin) synthase	Ptgis	101.388	49.8375	2.03438	0.00496477	Yes	No	0001516 // prostaglandin biosynthetic process // inferred from electronic annotation /// 0006633 // fatty acid biosynthetic process // inferred from electronic annotation /// 0008610 // lipid biosynthetic process // inferred from electronic annotation	0005783 // endoplasmic reticulum // inferred from electronic annotation /// 0005789 // endoplasmic reticulum membrane // inferred from electronic annotation /// 0016020 // membrane // inferred from electronic annotation /// 0016021 // integral to membrane // inferred from electronic annotation	0004497 // monooxygenase activity // inferred from electronic annotation /// 0005506 // iron ion binding // inferred from electronic annotation /// 0008116 // prostaglandin-I synthase activity // inferred from electronic annotation /// 0009055 // electron carrier activity // inferred from electronic annotation /// 0016853 // isomerase activity // inferred from electronic annotation /// 0020037 //…	5.60059	5.55364	5.76325	6.76298	6.6541	6.57417	5.136	5.00385	5.08875	6.66375	5.63916	5.0762
1445220_at	---	---	35.2025	17.377	2.02581	0.00424039	Yes	No	---	---	---	4.11022	4.21548	4.03163	5.15268	5.15268	5.10746	6.52567	6.82194	5.20236	5.13761	4.11911	6.18332
1429759_at	ribosomal protein S6 kinase polypeptide 6	Rps6ka6	44.7835	22.1685	2.02014	0.00476233	Yes	No	0006468 // protein amino acid phosphorylation // inferred from electronic annotation /// 0007243 // protein kinase cascade // inferred from electronic annotation	0005840 // ribosome // inferred from electronic annotation	0000166 // nucleotide binding // inferred from electronic annotation /// 0000287 // magnesium ion binding // inferred from electronic annotation /// 0004672 // protein kinase activity // inferred from electronic annotation /// 0004674 // protein serine/threonine kinase activity // inferred from electronic annotation /// 0004867 // serine-type endopeptidase inhibitor activity // inferred from elec…	4.51905	4.43074	4.46153	5.54137	5.57481	5.33851	4.85894	4.39285	4.24194	5.4849	4.47044	4.49791
1449770_x_at	transmembrane protein 191C	Tmem191c	214.728	106.632	2.01373	0.0046807	Yes	No	---	0016020 // membrane // inferred from electronic annotation /// 0016021 // integral to membrane // inferred from electronic annotation	---	6.86622	6.66949	6.67378	7.8241	7.71247	7.70253	8.06514	8.50659	7.79157	7.74637	6.7365	8.1211
1438204_at	Histone cluster 1, H1c (Hist1h1c), mRNA	Hist1h1c	44.4689	89.8278	0.495046	0.00430444	No	Yes	0006334 // nucleosome assembly // inferred from electronic annotation /// 0016584 // nucleosome positioning // inferred from mutant phenotype	0000786 // nucleosome // inferred from electronic annotation /// 0005634 // nucleus // inferred from electronic annotation /// 0005694 // chromosome // inferred from electronic annotation	0003677 // DNA binding // inferred from direct assay /// 0003677 // DNA binding // inferred from electronic annotation /// 0005515 // protein binding // inferred from physical interaction	6.59904	6.40717	6.46106	5.49393	5.44423	5.48601	5.75555	6.064	6.10173	5.47472	6.48909	5.97376
1434640_at	neurensin 2	Nrsn2	21.7755	44.0579	0.494248	0.00496477	No	Yes	---	0005886 // plasma membrane // inferred from electronic annotation /// 0016020 // membrane // inferred from electronic annotation /// 0016021 // integral to membrane // inferred from electronic annotation /// 0016023 // cytoplasmic membrane-bounded vesicle // inferred from direct assay /// 0030133 // transport vesicle // inferred from direct assay /// 0043025 // cell soma // inferred from direct a…	---	5.4346	5.61046	5.33893	4.40248	4.48792	4.44351	4.88996	4.90618	4.93499	4.44464	5.46133	4.91038
1418783_at	transient receptor potential cation channel, subfamily M, member 5	Trpm5	10.7015	21.6724	0.493787	0.00496477	No	Yes	0006810 // transport // inferred from electronic annotation /// 0006811 // ion transport // inferred from electronic annotation	0005886 // plasma membrane // inferred from electronic annotation /// 0016020 // membrane // inferred from electronic annotation /// 0016021 // integral to membrane // inferred from sequence or structural similarity /// 0016021 // integral to membrane // inferred from electronic annotation	0004872 // receptor activity // inferred from electronic annotation /// 0005216 // ion channel activity // inferred from electronic annotation /// 0005244 // voltage-gated ion channel activity // inferred from electronic annotation /// 0005509 // calcium ion binding // inferred from electronic annotation	4.58422	4.36668	4.36246	3.41648	3.49008	3.35268	3.80455	3.67305	3.68717	3.41975	4.43779	3.72159
1430728_at	keratin associated protein 5-5	Krtap5-5	16.1306	32.7258	0.492901	0.00470066	No	Yes	---	0005882 // intermediate filament // inferred from electronic annotation /// 0045095 // keratin filament // inferred from electronic annotation	---	5.04761	5.13622	4.91324	3.92906	4.07547	4.03065	4.44624	4.47019	4.62244	4.01173	5.03236	4.51296
1450196_s_at	glycogen synthase 1, muscle	Gys1	17.0966	34.7909	0.49141	0.00440516	No	Yes	0005978 // glycogen biosynthetic process // inferred from mutant phenotype /// 0005978 // glycogen biosynthetic process // inferred from electronic annotation /// 0007507 // heart development // inferred from mutant phenotype	0005737 // cytoplasm // inferred from direct assay /// 0016234 // inclusion body // inferred from direct assay	0003824 // catalytic activity // inferred from electronic annotation /// 0004373 // glycogen (starch) synthase activity // inferred from mutant phenotype /// 0004373 // glycogen (starch) synthase activity // inferred from electronic annotation /// 0005515 // protein binding // inferred from physical interaction /// 0016740 // transferase activity // inferred from electronic annotation /// 0016757…	5.15659	5.20804	4.99728	4.07375	4.07564	4.13752	4.24588	4.1546	4.19505	4.09564	5.12064	4.19851
1447346_s_at	RIKEN cDNA 5530400B01 gene	5530400B01Rik	61.4006	125.79	0.48812	0.00446103	No	Yes	---	---	---	7.00205	6.90085	7.02172	5.98578	5.82203	6.01273	6.03973	6.1774	6.34737	5.94018	6.97487	6.18817
1441017_at	zinc finger, CCHC domain containing 14	Zcchc14	46.9938	96.3485	0.487749	0.00260836	No	Yes	0007154 // cell communication // inferred from electronic annotation	---	0003676 // nucleic acid binding // inferred from electronic annotation /// 0005515 // protein binding // inferred from electronic annotation /// 0008270 // zinc ion binding // inferred from electronic annotation /// 0035091 // phosphoinositide binding // inferred from electronic annotation /// 0046872 // metal ion binding // inferred from electronic annotation	6.55058	6.63408	6.58591	5.52421	5.56141	5.57758	5.73422	5.72563	5.72563	5.5544	6.59019	5.72849
1448662_at	frizzled homolog 6 (Drosophila)	Fzd6	10.8086	22.1941	0.487002	0.00497381	No	Yes	0001736 // establishment of planar polarity // inferred from genetic interaction /// 0001843 // neural tube closure // inferred from genetic interaction /// 0007165 // signal transduction // inferred from electronic annotation /// 0007166 // cell surface receptor linked signal transduction // inferred from electronic annotation /// 0007186 // G-protein coupled receptor protein signaling pathway /…	0016020 // membrane // inferred from electronic annotation /// 0016021 // integral to membrane // inferred from electronic annotation /// 0016327 // apicolateral plasma membrane // inferred from direct assay /// 0045177 // apical part of cell // inferred from direct assay	0004871 // signal transducer activity // inferred from electronic annotation /// 0004872 // receptor activity // inferred from electronic annotation /// 0004888 // transmembrane receptor activity // inferred from electronic annotation /// 0004926 // non-G-protein coupled 7TM receptor activity // inferred from electronic annotation /// 0004930 // G-protein coupled receptor activity // inferred fro…	4.55921	4.531	4.3261	3.39074	3.39074	3.52083	3.74672	3.63561	3.90215	3.4341	4.4721	3.76149
1436768_x_at	RIKEN cDNA E130112L23 gene	E130112L23Rik	56.4627	116.383	0.485145	0.00417426	No	Yes	0007242 // intracellular signaling cascade // inferred from electronic annotation /// 0035023 // regulation of Rho protein signal transduction // inferred from electronic annotation	0005622 // intracellular // inferred from electronic annotation /// 0005737 // cytoplasm // inferred from electronic annotation	0005085 // guanyl-nucleotide exchange factor activity // inferred from electronic annotation /// 0005089 // Rho guanyl-nucleotide exchange factor activity // inferred from electronic annotation	6.77529	6.87788	6.93505	5.76907	5.84087	5.84774	6.13273	6.03101	6.22858	5.81923	6.86274	6.13077
1453363_at	calcium channel, voltage-dependent, gamma subunit 2	Cacng2	60.9532	126.801	0.4807	0.00465543	No	Yes	0006810 // transport // inferred from electronic annotation /// 0006811 // ion transport // inferred from electronic annotation /// 0006816 // calcium ion transport // inferred from electronic annotation /// 0007528 // neuromuscular junction development // inferred from mutant phenotype /// 0019226 // transmission of nerve impulse // inferred from genetic interaction /// 0042391 // regulation of …	0005923 // tight junction // inferred from electronic annotation /// 0016020 // membrane // inferred from electronic annotation /// 0016021 // integral to membrane // inferred from electronic annotation	0005198 // structural molecule activity // inferred from electronic annotation /// 0005216 // ion channel activity // inferred from electronic annotation /// 0005244 // voltage-gated ion channel activity // inferred from electronic annotation /// 0005245 // voltage-gated calcium channel activity // inferred from mutant phenotype /// 0005245 // voltage-gated calcium channel activity // inferred fr…	7.10699	6.90455	6.94772	6.00631	5.84769	5.93489	6.16528	6.45649	6.40325	5.92963	6.98642	6.34167
1439529_at	RIKEN cDNA A430110N23 gene	A430110N23Rik	53.3108	111.061	0.480015	0.00470066	No	Yes	---	0005576 // extracellular region // inferred from electronic annotation /// 0016020 // membrane // inferred from electronic annotation	0005044 // scavenger receptor activity // inferred from electronic annotation	6.87725	6.74331	6.76506	5.59986	5.83003	5.77918	5.95708	6.37209	5.96519	5.73636	6.79521	6.09812
1432107_at	RIKEN cDNA 2310010M20 gene	2310010M20Rik	11.8786	24.7479	0.479985	0.00430444	No	Yes	---	0016020 // membrane // inferred from electronic annotation /// 0016021 // integral to membrane // inferred from electronic annotation	---	4.71043	4.53284	4.64444	3.53377	3.53077	3.64635	3.54308	3.75177	3.7314	3.5703	4.62924	3.67542
1420001_at	DNA segment, Chr 7, ERATO Doi 1, expressed	D7Ertd1e	28.673	60.0227	0.477703	0.00430444	No	Yes	---	---	---	5.80223	5.96538	5.9547	4.91934	4.81385	4.79168	5.12439	5.12439	5.13655	4.84162	5.90744	5.12844
1450556_at	spectrin beta 1	Spnb1	40.6014	85.0809	0.477209	0.00459609	No	Yes	0051016 // barbed-end actin filament capping // inferred from electronic annotation	0005737 // cytoplasm // inferred from electronic annotation /// 0005856 // cytoskeleton // inferred from electronic annotation /// 0005886 // plasma membrane // inferred from direct assay /// 0008091 // spectrin // inferred from electronic annotation /// 0009986 // cell surface // inferred from electronic annotation /// 0016020 // membrane // inferred from direct assay /// 0030863 // cortical cyt…	0003779 // actin binding // inferred from electronic annotation /// 0005200 // structural constituent of cytoskeleton // inferred from electronic annotation	6.29812	6.44118	6.49299	5.25902	5.3375	5.43385	5.91132	5.70618	5.77918	5.34346	6.41076	5.79889
1432410_a_at	bone morphogenetic protein 7	Bmp7	13.7653	28.8656	0.476875	0.00464537	No	Yes	0001503 // ossification // inferred from electronic annotation /// 0001707 // mesoderm formation // inferred from genetic interaction /// 0001822 // kidney development // inferred from mutant phenotype /// 0007275 // multicellular organismal development // inferred from electronic annotation /// 0007389 // pattern specification process // inferred from mutant phenotype /// 0007411 // axon guidanc…	0005576 // extracellular region // inferred from electronic annotation /// 0005615 // extracellular space // inferred from direct assay /// 0005615 // extracellular space // inferred from electronic annotation	0005125 // cytokine activity // traceable author statement /// 0005125 // cytokine activity // inferred from electronic annotation /// 0005515 // protein binding // inferred from physical interaction /// 0005515 // protein binding // inferred from electronic annotation /// 0008083 // growth factor activity // inferred from electronic annotation /// 0008201 // heparin binding // inferred from elec…	4.80437	4.91519	4.83428	3.64528	3.87468	3.82893	3.87726	3.90156	3.8686	3.78296	4.85128	3.88247
1430078_a_at	8-oxoguanine DNA-glycosylase 1	Ogg1	122.883	257.725	0.4768	0.00430444	No	Yes	0006281 // DNA repair // inferred from genetic interaction /// 0006281 // DNA repair // inferred from mutant phenotype /// 0006281 // DNA repair // inferred from electronic annotation /// 0006284 // base-excision repair // inferred from direct assay /// 0006284 // base-excision repair // inferred from mutant phenotype /// 0006284 // base-excision repair // inferred from electronic annotation /// …	0005622 // intracellular // inferred from electronic annotation /// 0005634 // nucleus // inferred from mutant phenotype /// 0005634 // nucleus // inferred from electronic annotation /// 0005739 // mitochondrion // inferred from direct assay /// 0005739 // mitochondrion // inferred from mutant phenotype	0000702 // oxidized base lesion DNA N-glycosylase activity // traceable author statement /// 0003677 // DNA binding // inferred from electronic annotation /// 0003684 // damaged DNA binding // inferred from electronic annotation /// 0003824 // catalytic activity // inferred from electronic annotation /// 0003906 // DNA-(apurinic or apyrimidinic site) lyase activity // inferred from electronic ann…	8.01208	8.06748	7.9495	6.93129	7.03834	6.8538	6.84235	6.9558	7.05208	6.94114	8.00969	6.95008
1425439_a_at	solute carrier family 41, member 3	Slc41a3	127.467	267.861	0.475869	0.00430444	No	Yes	0006812 // cation transport // inferred from electronic annotation	0005886 // plasma membrane // inferred from electronic annotation /// 0016020 // membrane // inferred from electronic annotation /// 0016021 // integral to membrane // inferred from electronic annotation	0005515 // protein binding // inferred from physical interaction /// 0008324 // cation transmembrane transporter activity // inferred from electronic annotation	8.12357	8.11705	7.9554	7.0357	6.94059	7.00564	7.46229	7.33277	7.33277	6.99398	8.06534	7.37594
1427987_at	scaffold attachment factor B2	Safb2	302.16	635.441	0.475512	0.0046807	No	Yes	0006350 // transcription // inferred from electronic annotation /// 0006355 // regulation of transcription, DNA-dependent // inferred from electronic annotation	0005634 // nucleus // inferred from electronic annotation /// 0005737 // cytoplasm // inferred from electronic annotation	0000166 // nucleotide binding // inferred from electronic annotation /// 0003676 // nucleic acid binding // inferred from electronic annotation /// 0003677 // DNA binding // inferred from electronic annotation /// 0003723 // RNA binding // inferred from electronic annotation	9.43446	9.27547	9.22491	8.27642	8.14276	8.29832	8.51953	8.45453	8.15725	8.23917	9.31161	8.3771
1421081_a_at	barrier to autointegration factor 1	Banf1	241.411	507.969	0.475248	0.0046807	No	Yes	0015074 // DNA integration // inferred from direct assay /// 0019047 // provirus integration // traceable author statement	0005634 // nucleus // inferred from electronic annotation /// 0005694 // chromosome // inferred from electronic annotation /// 0005737 // cytoplasm // inferred from electronic annotation	0003677 // DNA binding // inferred from direct assay /// 0003677 // DNA binding // traceable author statement /// 0003677 // DNA binding // inferred from electronic annotation	8.97163	9.05711	8.93705	8.04974	7.80711	7.8892	6.26569	5.88618	6.13261	7.91535	8.9886	6.09483
1422940_x_at	serine (or cysteine) peptidase inhibitor, clade B (ovalbumin), member 3B /// ser	Serpinb3b /// Serpinb3c	9.77604	20.8166	0.469627	0.00480678	No	Yes	---	---	0004867 // serine-type endopeptidase inhibitor activity // inferred from direct assay /// 0004867 // serine-type endopeptidase inhibitor activity // inferred from electronic annotation /// 0004869 // cysteine protease inhibitor activity // inferred from direct assay /// 0005515 // protein binding // inferred from physical interaction	4.54968	4.29853	4.29078	3.29626	3.26766	3.30383	3.49136	3.53377	3.53377	3.28925	4.37966	3.51963
1437094_x_at	dynein, axonemal, intermediate chain 1	Dnaic1	19.0884	40.9736	0.46587	0.0046807	No	Yes	---	0005874 // microtubule // inferred from electronic annotation /// 0030286 // dynein complex // inferred from electronic annotation	0003774 // motor activity // inferred from electronic annotation	5.36652	5.42685	5.2765	4.13019	4.267	4.36668	4.36668	4.24477	4.2051	4.25462	5.35662	4.27218
1447743_x_at	exostoses (multiple) 2	Ext2	36.5498	78.4802	0.465721	0.00459075	No	Yes	0001503 // ossification // inferred from electronic annotation /// 0001707 // mesoderm formation // inferred from mutant phenotype /// 0006024 // glycosaminoglycan biosynthetic process // inferred from electronic annotation /// 0015012 // heparan sulfate proteoglycan biosynthetic process // inferred from mutant phenotype /// 0015014 // heparan sulfate proteoglycan biosynthetic process, polysaccha…	0000139 // Golgi membrane // inferred by curator /// 0000139 // Golgi membrane // inferred from electronic annotation /// 0005783 // endoplasmic reticulum // inferred from electronic annotation /// 0005783 // endoplasmic reticulum // inferred from direct assay /// 0005789 // endoplasmic reticulum membrane // inferred by curator /// 0005789 // endoplasmic reticulum membrane // inferred from electr…	0005515 // protein binding // inferred from electronic annotation /// 0008375 // acetylglucosaminyltransferase activity // inferred from direct assay /// 0015020 // glucuronosyltransferase activity // inferred from direct assay /// 0016740 // transferase activity // inferred from electronic annotation /// 0016757 // transferase activity, transferring glycosyl groups // inferred from electronic an…	6.26539	6.41237	6.20501	5.09371	5.25026	5.23141	5.63254	5.68482	5.43423	5.19179	6.29426	5.58386
1450795_at	luteinizing hormone beta	Lhb	21.1	45.4207	0.464547	0.00320227	No	Yes	---	0005576 // extracellular region // inferred from electronic annotation	0005179 // hormone activity // inferred from electronic annotation	5.55899	5.46115	5.49569	4.40964	4.4447	4.34318	4.62995	4.33527	4.69392	4.39917	5.50528	4.55305
1437604_x_at	adenomatosis polyposis coli down-regulated 1	Apcdd1	38.4428	82.8577	0.463961	0.00459075	No	Yes	---	0016020 // membrane // inferred from electronic annotation /// 0016021 // integral to membrane // inferred from electronic annotation	---	6.45813	6.25563	6.40393	5.20953	5.21519	5.3692	5.48834	5.59306	5.79611	5.26464	6.37256	5.62584
1457463_at	Down syndrome cell adhesion molecule-like 1	Dscaml1	38.5956	83.7057	0.461087	0.00446103	No	Yes	0006183 // GTP biosynthetic process // inferred from electronic annotation /// 0006228 // UTP biosynthetic process // inferred from electronic annotation /// 0006241 // CTP biosynthetic process // inferred from electronic annotation /// 0007156 // homophilic cell adhesion // not recorded /// 0016338 // calcium-independent cell-cell adhesion // not recorded	0005886 // plasma membrane // not recorded	0004550 // nucleoside diphosphate kinase activity // inferred from electronic annotation /// 0005524 // ATP binding // inferred from electronic annotation	6.34522	6.40463	6.41191	5.1367	5.28604	5.38835	5.14121	5.52786	5.47104	5.27036	6.38725	5.38004
1440227_at	solute carrier family 5 (inositol transporters), member 3	Slc5a3	92.4303	201.571	0.458549	0.00440516	No	Yes	0006020 // inositol metabolic process // inferred from mutant phenotype /// 0006412 // translation // inferred from electronic annotation /// 0006810 // transport // inferred from electronic annotation /// 0006811 // ion transport // inferred from electronic annotation /// 0006814 // sodium ion transport // inferred from electronic annotation /// 0007422 // peripheral nervous system development /…	0005622 // intracellular // inferred from electronic annotation /// 0005739 // mitochondrion // inferred from direct assay /// 0005739 // mitochondrion // inferred from electronic annotation /// 0005840 // ribosome // inferred from electronic annotation /// 0016020 // membrane // inferred from electronic annotation /// 0016021 // integral to membrane // inferred from electronic annotation /// 003…	0003735 // structural constituent of ribosome // inferred from electronic annotation /// 0005215 // transporter activity // inferred from electronic annotation /// 0015293 // symporter activity // inferred from electronic annotation /// 0031402 // sodium ion binding // inferred from electronic annotation	7.69077	7.5839	7.69077	6.65703	6.43716	6.49669	8.96072	9.37086	8.82904	6.53029	7.65515	9.05354
1437929_at	dapper homolog 2, antagonist of beta-catenin (xenopus)	Dact2	28.2348	61.6218	0.458195	0.00248757	No	Yes	---	---	---	5.94181	5.90732	5.98698	4.82201	4.79116	4.84504	4.95569	5.24267	5.12576	4.8194	5.94537	5.10804
1431561_a_at	DEAH (Asp-Glu-Ala-His) box polypeptide 34	Dhx34	256.054	560.913	0.456496	0.00445807	No	Yes	---	0005622 // intracellular // inferred from electronic annotation	0000166 // nucleotide binding // inferred from electronic annotation /// 0003676 // nucleic acid binding // inferred from electronic annotation /// 0003723 // RNA binding // inferred from electronic annotation /// 0004386 // helicase activity // inferred from electronic annotation /// 0005524 // ATP binding // inferred from electronic annotation /// 0008270 // zinc ion binding // inferred from el…	9.19623	9.18522	9.01345	8.04941	7.90453	8.04698	8.24092	8.35653	8.80793	8.00031	9.13163	8.46846
1430937_at	RIKEN cDNA A930016O22 gene	A930016O22Rik	41.7027	91.5351	0.455593	0.0046807	No	Yes	---	---	---	6.47071	6.56754	6.51051	5.49889	5.22932	5.418	5.58974	5.51882	5.64008	5.38207	6.51625	5.58288
1457823_at	cysteine rich protein 61	Cyr61	9.53256	20.9953	0.454033	0.00414948	No	Yes	0001558 // regulation of cell growth // inferred from electronic annotation /// 0001569 // patterning of blood vessels // inferred from mutant phenotype /// 0006935 // chemotaxis // inferred from electronic annotation /// 0007155 // cell adhesion // inferred from electronic annotation /// 0010811 // positive regulation of cell-substrate adhesion // inferred from direct assay /// 0030198 // extrac…	0005576 // extracellular region // inferred from electronic annotation	0005515 // protein binding // inferred from electronic annotation /// 0005520 // insulin-like growth factor binding // inferred from electronic annotation /// 0008201 // heparin binding // inferred from electronic annotation /// 0019838 // growth factor binding // inferred from electronic annotation /// 0050840 // extracellular matrix binding // inferred from direct assay	4.47768	4.39589	4.30241	3.21313	3.27629	3.26917	3.29594	3.27313	3.04342	3.25286	4.39199	3.20416
1426338_a_at	netrin G1	Ntng1	16.0604	35.3961	0.453733	0.00248757	No	Yes	0007275 // multicellular organismal development // inferred from electronic annotation /// 0007399 // nervous system development // inferred from electronic annotation /// 0007409 // axonogenesis // inferred from direct assay /// 0030154 // cell differentiation // inferred from electronic annotation	0005578 // proteinaceous extracellular matrix // inferred from electronic annotation /// 0005886 // plasma membrane // inferred from direct assay /// 0005886 // plasma membrane // inferred from electronic annotation /// 0016020 // membrane // inferred from electronic annotation /// 0031225 // anchored to membrane // inferred from electronic annotation /// 0046658 // anchored to plasma membrane //…	---	5.11251	5.15868	5.16537	4.02671	3.98416	4.00544	4.34082	4.23467	4.36273	4.00544	5.14552	4.31274
1457004_at	DNA segment, Chr 15, Wayne State University 169, expressed	D15Wsu169e	59.6936	131.781	0.452974	0.00476976	No	Yes	0007165 // signal transduction // inferred from electronic annotation	0005622 // intracellular // inferred from electronic annotation /// 0005634 // nucleus // inferred from electronic annotation /// 0005856 // cytoskeleton // inferred from electronic annotation	0005515 // protein binding // inferred from electronic annotation	7.20551	7.01041	6.91009	5.93329	5.86114	5.90408	5.93891	5.91112	6.0222	5.8995	7.042	5.95741
1428717_at	secernin 1	Scrn1	40.4417	89.3352	0.452696	0.00459075	No	Yes	0006508 // proteolysis // inferred from electronic annotation /// 0006887 // exocytosis // inferred from electronic annotation /// 0006887 // exocytosis // inferred from sequence or structural similarity	0005634 // nucleus // inferred from electronic annotation /// 0005737 // cytoplasm // inferred from electronic annotation /// 0031965 // nuclear membrane // inferred from electronic annotation	0016805 // dipeptidase activity // inferred from electronic annotation	6.45174	6.61577	6.37596	5.33797	5.40769	5.26765	5.67455	5.68482	5.57305	5.33777	6.48116	5.64414
1456571_at	decapping enzyme, scavenger	Dcps	21.3649	47.332	0.451385	0.00414948	No	Yes	0000184 // nuclear-transcribed mRNA catabolic process, nonsense-mediated decay // inferred from electronic annotation /// 0000290 // deadenylation-dependent decapping of nuclear-transcribed mRNA // inferred from electronic annotation	0005634 // nucleus // inferred from electronic annotation /// 0005737 // cytoplasm // inferred from electronic annotation	0003824 // catalytic activity // inferred from electronic annotation /// 0005515 // protein binding // inferred from electronic annotation /// 0016787 // hydrolase activity // inferred from electronic annotation	5.5263	5.49411	5.67382	4.4299	4.40939	4.41223	4.4708	4.3068	4.55699	4.41717	5.56474	4.44486
1421226_at	triggering receptor expressed on myeloid cells 2	Trem2	59.3056	132.107	0.448921	0.00430444	No	Yes	---	0005576 // extracellular region // inferred from electronic annotation /// 0005886 // plasma membrane // inferred from electronic annotation /// 0016020 // membrane // inferred from electronic annotation /// 0016021 // integral to membrane // inferred from electronic annotation	0004872 // receptor activity // inferred from electronic annotation /// 0004888 // transmembrane receptor activity // inferred from sequence or structural similarity	7.06599	7.07366	6.99704	5.9105	5.76926	5.99053	6.05302	6.14184	6.14184	5.8901	7.04556	6.11223
1445054_at	---	---	27.8916	62.3536	0.447313	0.00430444	No	Yes	---	---	---	5.93823	6.09013	5.85884	4.80939	4.77533	4.82055	5.1106	5.11669	5.11669	4.80176	5.9624	5.11466
1428434_at	zinc finger, CCHC domain containing 12	Zcchc12	40.8174	91.3509	0.44682	0.00414948	No	Yes	0006350 // transcription // inferred from electronic annotation /// 0006355 // regulation of transcription, DNA-dependent // inferred from electronic annotation	---	0003676 // nucleic acid binding // inferred from electronic annotation /// 0008270 // zinc ion binding // inferred from electronic annotation /// 0046872 // metal ion binding // inferred from electronic annotation	6.53745	6.49728	6.50531	5.29712	5.4591	5.29712	6.10999	5.86064	5.91304	5.35111	6.51335	5.96122
1424392_at	alcohol dehydrogenase, iron containing, 1	Adhfe1	12.3241	27.7365	0.444327	0.0046807	No	Yes	0015993 // molecular hydrogen transport // inferred from electronic annotation /// 0015993 // molecular hydrogen transport // inferred from sequence or structural similarity /// 0055114 // oxidation reduction // inferred from electronic annotation	0005739 // mitochondrion // inferred from direct assay /// 0005739 // mitochondrion // inferred from electronic annotation	0016491 // oxidoreductase activity // inferred from electronic annotation /// 0046872 // metal ion binding // inferred from electronic annotation /// 0047988 // hydroxyacid-oxoacid transhydrogenase activity // inferred from electronic annotation /// 0047988 // hydroxyacid-oxoacid transhydrogenase activity // inferred from sequence or structural similarity	4.75437	4.76908	4.85769	3.78385	3.57124	3.51513	3.61302	3.44998	3.75036	3.62341	4.79371	3.60445
1428707_at	parathymosin	Ptms	290.878	658.356	0.441825	0.00430444	No	Yes	0006413 // translational initiation // inferred from electronic annotation /// 0006955 // immune response // inferred from electronic annotation	---	0003743 // translation initiation factor activity // inferred from electronic annotation	9.39827	9.29871	9.39119	8.08107	8.16506	8.30668	8.62752	8.42234	8.58691	8.18427	9.36272	8.54559
1420606_at	neuropeptide FF-amide peptide precursor	Npff	83.4648	189.362	0.44077	0.00440516	No	Yes	0006355 // regulation of transcription, DNA-dependent // inferred from electronic annotation /// 0007218 // neuropeptide signaling pathway // inferred from electronic annotation	0005576 // extracellular region // inferred from electronic annotation /// 0005622 // intracellular // inferred from electronic annotation /// 0005634 // nucleus // inferred from electronic annotation	0003677 // DNA binding // inferred from electronic annotation /// 0003700 // transcription factor activity // inferred from electronic annotation /// 0005184 // neuropeptide hormone activity // inferred from electronic annotation /// 0008270 // zinc ion binding // inferred from electronic annotation /// 0043565 // sequence-specific DNA binding // inferred from electronic annotation /// 0046983 //…	7.48654	7.71528	7.49318	6.37214	6.35508	6.42207	6.9655	6.99086	6.8057	6.3831	7.565	6.92069
1422574_at	Max dimerization protein 4	Mxd4	74.2315	168.585	0.440321	0.00492234	No	Yes	0006350 // transcription // inferred from electronic annotation /// 0006355 // regulation of transcription, DNA-dependent // inferred from electronic annotation /// 0016481 // negative regulation of transcription // inferred from genetic interaction /// 0045449 // regulation of transcription // inferred from electronic annotation	0005634 // nucleus // inferred from electronic annotation	0003677 // DNA binding // inferred from direct assay /// 0003677 // DNA binding // inferred from electronic annotation /// 0005515 // protein binding // inferred from physical interaction /// 0030528 // transcription regulator activity // inferred from electronic annotation	7.40403	7.30687	7.4811	6.27173	6.05325	6.3169	6.12692	6.1689	6.35649	6.21396	7.39733	6.21744
1451815_at	UDP-GlcNAc:betaGal beta-1,3-N-acetylglucosaminyltransferase 4	B3gnt4	16.0222	36.9056	0.434139	0.00440516	No	Yes	0006486 // protein amino acid glycosylation // inferred from electronic annotation	0000139 // Golgi membrane // inferred from electronic annotation /// 0005794 // Golgi apparatus // inferred from electronic annotation /// 0016020 // membrane // inferred from electronic annotation /// 0016021 // integral to membrane // inferred from electronic annotation	0008378 // galactosyltransferase activity // inferred from electronic annotation /// 0016740 // transferase activity // inferred from electronic annotation /// 0016757 // transferase activity, transferring glycosyl groups // inferred from electronic annotation	5.22861	5.30076	5.08793	3.90325	4.03089	4.07185	4.40883	4.3581	4.11814	4.002	5.20577	4.29502
1428708_x_at	parathymosin	Ptms	292.016	680.363	0.429206	0.00397645	No	Yes	0006413 // translational initiation // inferred from electronic annotation /// 0006955 // immune response // inferred from electronic annotation	---	0003743 // translation initiation factor activity // inferred from electronic annotation	9.38143	9.3722	9.47685	8.21601	8.10594	8.24776	8.47315	8.39617	8.51414	8.1899	9.41016	8.46115
1439838_a_at	transmembrane inner ear	Tmie	29.1361	67.9974	0.428489	0.00430444	No	Yes	0007605 // sensory perception of sound // inferred from mutant phenotype /// 0007605 // sensory perception of sound // inferred from electronic annotation /// 0042472 // inner ear morphogenesis // inferred from mutant phenotype	0016020 // membrane // inferred from electronic annotation /// 0016021 // integral to membrane // inferred from electronic annotation	---	6.22415	6.01099	6.02708	4.87801	4.86073	4.85547	5.00331	5.00162	5.28843	4.86474	6.08741	5.09779
1438393_at	---	---	18.2693	42.6567	0.428286	0.00414948	No	Yes	---	---	---	5.38239	5.37256	5.48915	4.1814	4.2745	4.11814	4.55099	4.17982	4.3919	4.19135	5.4147	4.37424
1421659_at	adrenergic receptor, alpha 1a	Adra1a	17.9121	42.1261	0.425201	0.00417426	No	Yes	0001985 // negative regulation of heart rate in baroreceptor response to increased systemic arterial blood pressure // inferred from mutant phenotype /// 0001994 // norepinephrine-epinephrine vasoconstriction involved in regulation of systemic arterial blood pressure // inferred from mutant phenotype /// 0001996 // positive regulation of heart rate by epinephrine-norepinephrine // inferred from g…	0005624 // membrane fraction // inferred from direct assay /// 0005886 // plasma membrane // inferred from electronic annotation /// 0016020 // membrane // inferred from electronic annotation /// 0016021 // integral to membrane // inferred from electronic annotation	0004871 // signal transducer activity // inferred from electronic annotation /// 0004872 // receptor activity // inferred from electronic annotation /// 0004930 // G-protein coupled receptor activity // inferred from electronic annotation /// 0004935 // adrenoceptor activity // inferred from electronic annotation /// 0004937 // alpha1-adrenergic receptor activity // inferred from direct assay ///…	5.35717	5.37832	5.45444	4.07547	4.26532	4.14779	4.73215	4.36465	4.52344	4.16286	5.39664	4.54008
1421388_at	myocyte enhancer factor 2D	Mef2d	114.041	269.804	0.422682	0.00446103	No	Yes	0001649 // osteoblast differentiation // inferred from genetic interaction /// 0001958 // endochondral ossification // inferred from genetic interaction /// 0002062 // chondrocyte differentiation // inferred from genetic interaction /// 0006350 // transcription // inferred from electronic annotation /// 0006355 // regulation of transcription, DNA-dependent // inferred from direct assay /// 000635…	0005634 // nucleus // inferred by curator /// 0005634 // nucleus // inferred from direct assay /// 0005634 // nucleus // inferred from electronic annotation	0003677 // DNA binding // inferred from direct assay /// 0003677 // DNA binding // inferred from electronic annotation /// 0003700 // transcription factor activity // inferred from direct assay /// 0003700 // transcription factor activity // inferred from electronic annotation /// 0016563 // transcription activator activity // inferred from direct assay /// 0043565 // sequence-specific DNA bindin…	8.02789	8.17118	8.02824	6.9625	6.81515	6.72259	7.02036	6.87379	7.1448	6.83341	8.07577	7.01298
1455125_at	centaurin, beta 1	Centb1	140.389	332.754	0.421899	0.00440516	No	Yes	0006629 // lipid metabolic process // inferred from electronic annotation /// 0007165 // signal transduction // inferred from electronic annotation /// 0007242 // intracellular signaling cascade // inferred from electronic annotation /// 0016042 // lipid catabolic process // inferred from electronic annotation /// 0032312 // regulation of ARF GTPase activity // inferred from electronic annotation	0005737 // cytoplasm // inferred from electronic annotation	0000166 // nucleotide binding // inferred from electronic annotation /// 0004629 // phospholipase C activity // inferred from electronic annotation /// 0004871 // signal transducer activity // inferred from electronic annotation /// 0004872 // receptor activity // inferred from electronic annotation /// 0005515 // protein binding // inferred from electronic annotation /// 0005524 // ATP binding /…	8.35039	8.26171	8.52284	7.07401	7.15723	7.16861	7.84796	7.91705	8.0724	7.13328	8.37831	7.9458
1424566_s_at	polymerase (RNA) III (DNA directed) polypeptide D	Polr3d	99.3334	236.064	0.420789	0.0047182	No	Yes	0006350 // transcription // inferred from electronic annotation /// 0006383 // transcription from RNA polymerase III promoter // inferred from electronic annotation	0005634 // nucleus // inferred from electronic annotation /// 0005666 // DNA-directed RNA polymerase III complex // inferred from electronic annotation	0003677 // DNA binding // inferred from electronic annotation /// 0003899 // DNA-directed RNA polymerase activity // inferred from electronic annotation	7.94985	7.7476	7.95166	6.49838	6.70903	6.69521	6.68605	6.64725	6.7185	6.63421	7.88304	6.68393
1459858_x_at	cartilage acidic protein 1	Crtac1	9.76859	23.4246	0.417023	0.00440516	No	Yes	---	0005576 // extracellular region // inferred from electronic annotation	0005509 // calcium ion binding // inferred from electronic annotation	4.45612	4.50302	4.69071	3.24614	3.24884	3.36947	3.1807	3.59462	3.59462	3.28815	4.54995	3.45665
1453724_a_at	serine (or cysteine) peptidase inhibitor, clade F, member 1	Serpinf1	65.0121	156.568	0.415231	0.00456556	No	Yes	0016525 // negative regulation of angiogenesis // inferred from direct assay /// 0016525 // negative regulation of angiogenesis // inferred from electronic annotation /// 0050769 // positive regulation of neurogenesis // inferred from sequence or structural similarity /// 0050769 // positive regulation of neurogenesis // inferred from electronic annotation	0005576 // extracellular region // inferred from direct assay /// 0005576 // extracellular region // inferred from electronic annotation /// 0005615 // extracellular space // inferred from direct assay /// 0042470 // melanosome // inferred from electronic annotation	0004867 // serine-type endopeptidase inhibitor activity // inferred from electronic annotation	7.30488	7.4081	7.15897	6.1205	5.96199	5.98542	6.26395	6.36781	6.50258	6.02264	7.29065	6.37811
1456291_x_at	scleraxis	Scx	12.4177	30.0592	0.413108	0.00459075	No	Yes	0006350 // transcription // inferred from electronic annotation /// 0006355 // regulation of transcription, DNA-dependent // inferred from electronic annotation /// 0007275 // multicellular organismal development // inferred from electronic annotation /// 0045449 // regulation of transcription // inferred from electronic annotation	0005634 // nucleus // inferred from electronic annotation	0003677 // DNA binding // inferred from electronic annotation /// 0030528 // transcription regulator activity // inferred from electronic annotation	4.88334	4.98524	4.86062	3.50373	3.78195	3.61729	3.72393	3.63836	3.78641	3.63432	4.90973	3.71623
1459911_at	cerebellar degeneration-related protein 2-like	Cdr2l	45.6331	110.628	0.412491	0.00476976	No	Yes	---	---	---	6.92941	6.68117	6.75815	5.5147	5.39338	5.62795	5.688	5.85094	5.80329	5.51201	6.78958	5.78074
1421150_at	human immunodeficiency virus type I enhancer binding protein 3	Hivep3	32.1113	77.854	0.412455	0.00397645	No	Yes	0006350 // transcription // inferred from electronic annotation /// 0006355 // regulation of transcription, DNA-dependent // inferred from electronic annotation /// 0045941 // positive regulation of transcription // not recorded /// 0045941 // positive regulation of transcription // inferred from electronic annotation	0005622 // intracellular // inferred from electronic annotation /// 0005634 // nucleus // inferred from direct assay /// 0005634 // nucleus // inferred from electronic annotation /// 0005737 // cytoplasm // inferred from electronic annotation	0003676 // nucleic acid binding // inferred from electronic annotation /// 0003677 // DNA binding // inferred from direct assay /// 0008270 // zinc ion binding // inferred from electronic annotation /// 0016563 // transcription activator activity // not recorded /// 0016563 // transcription activator activity // inferred from electronic annotation /// 0046872 // metal ion binding // inferred from…	6.22159	6.27875	6.34776	4.94388	4.9833	5.08785	5.41755	5.51751	5.50951	5.00501	6.2827	5.48152
1450810_at	follicle stimulating hormone receptor	Fshr	16.5735	40.2091	0.412184	0.00430444	No	Yes	0007165 // signal transduction // inferred from electronic annotation /// 0007186 // G-protein coupled receptor protein signaling pathway // inferred from electronic annotation	0005886 // plasma membrane // inferred from electronic annotation /// 0016020 // membrane // inferred from electronic annotation /// 0016021 // integral to membrane // inferred from electronic annotation	0004871 // signal transducer activity // inferred from electronic annotation /// 0004872 // receptor activity // inferred from electronic annotation /// 0004930 // G-protein coupled receptor activity // inferred from electronic annotation /// 0004963 // follicle-stimulating hormone receptor activity // inferred from electronic annotation /// 0005515 // protein binding // inferred from electronic …	5.31827	5.30123	5.36885	3.91787	4.06682	4.16774	4.47588	4.1071	4.36668	4.05081	5.32945	4.31655
1420598_x_at	defensin related cryptdin, related sequence 2	Defcr-rs2	116.168	281.967	0.411991	0.00430444	No	Yes	0006952 // defense response // inferred from electronic annotation /// 0032496 // response to lipopolysaccharide // inferred from direct assay /// 0050829 // defense response to Gram-negative bacterium // inferred from direct assay /// 0050830 // defense response to Gram-positive bacterium // inferred from direct assay	0005576 // extracellular region // inferred from electronic annotation /// 0005615 // extracellular space // inferred from electronic annotation	0001530 // lipopolysaccharide binding // inferred from direct assay /// 0042803 // protein homodimerization activity // inferred from physical interaction /// 0046982 // protein heterodimerization activity // inferred from physical interaction	7.9857	8.19337	8.23907	6.89028	6.81578	6.87413	6.94955	6.97462	6.98723	6.86006	8.13938	6.97047
1426305_at	uroplakin 1A	Upk1a	31.4612	77.3279	0.406854	0.00446103	No	Yes	0006897 // endocytosis // traceable author statement /// 0007165 // signal transduction // traceable author statement /// 0030855 // epithelial cell differentiation // inferred from electronic annotation /// 0030855 // epithelial cell differentiation // inferred from sequence or structural similarity /// 0051259 // protein oligomerization // inferred from sequence or structural similarity	0005783 // endoplasmic reticulum // inferred from sequence or structural similarity /// 0005886 // plasma membrane // inferred from sequence or structural similarity /// 0016020 // membrane // inferred from electronic annotation /// 0016021 // integral to membrane // traceable author statement /// 0016021 // integral to membrane // inferred from electronic annotation /// 0016021 // integral to me…	0005515 // protein binding // inferred from physical interaction /// 0005515 // protein binding // inferred from sequence or structural similarity /// 0042803 // protein homodimerization activity // inferred from sequence or structural similarity /// 0048029 // monosaccharide binding // inferred from direct assay	6.17386	6.43716	6.20773	4.94576	4.94176	5.03898	5.14129	5.43827	5.27718	4.9755	6.27292	5.28558
1433147_at	caldesmon 1	Cald1	16.1344	40.0067	0.403293	0.00459075	No	Yes	0006936 // muscle contraction // inferred from electronic annotation /// 0006940 // regulation of smooth muscle contraction // traceable author statement	0005624 // membrane fraction // inferred from direct assay /// 0030478 // actin cap // inferred from direct assay	0003779 // actin binding // traceable author statement /// 0003779 // actin binding // inferred from electronic annotation /// 0005516 // calmodulin binding // inferred from electronic annotation /// 0017022 // myosin binding // inferred from electronic annotation	5.32268	5.27498	5.36885	3.92046	4.1868	3.92895	4.18403	4.15573	4.19131	4.01207	5.32217	4.17702
1421380_at	insulin receptor	Insr	19.9386	50.0748	0.398176	0.00414948	No	Yes	0000187 // activation of MAPK activity // inferred from electronic annotation /// 0003007 // heart morphogenesis // inferred from electronic annotation /// 0006468 // protein amino acid phosphorylation // inferred from electronic annotation /// 0007169 // transmembrane receptor protein tyrosine kinase signaling pathway // inferred from electronic annotation /// 0007186 // G-protein coupled recept…	0005768 // endosome // inferred from electronic annotation /// 0005792 // microsome // inferred from electronic annotation /// 0005829 // cytosol // inferred from electronic annotation /// 0005886 // plasma membrane // inferred from direct assay /// 0005886 // plasma membrane // inferred from electronic annotation /// 0005887 // integral to plasma membrane // inferred from electronic annotation /…	0000166 // nucleotide binding // inferred from electronic annotation /// 0004672 // protein kinase activity // inferred from electronic annotation /// 0004713 // protein tyrosine kinase activity // inferred from electronic annotation /// 0004714 // transmembrane receptor protein tyrosine kinase activity // inferred from electronic annotation /// 0004716 // receptor signaling protein tyrosine kina…	5.72516	5.60206	5.61082	4.28274	4.42023	4.2495	4.44916	4.87297	4.53849	4.31749	5.64601	4.62021
1442042_at	---	---	111.626	280.368	0.398142	0.00470066	No	Yes	---	---	---	8.05757	8.18005	8.15591	6.76012	6.98326	6.66421	7.11329	7.38148	7.43165	6.80253	8.13118	7.30881
1433084_at	RIKEN cDNA 4930402C16 gene	4930402C16Rik	19.7743	50.5756	0.390985	0.00470066	No	Yes	---	---	---	5.5174	5.63289	5.83082	4.35237	4.2077	4.3566	4.0628	4.57065	4.38275	4.30556	5.66037	4.33873
1442264_at	RAS, guanyl releasing protein 2	Rasgrp2	92.2988	236.126	0.390888	0.00496477	No	Yes	0007242 // intracellular signaling cascade // inferred from electronic annotation /// 0007264 // small GTPase mediated signal transduction // inferred from electronic annotation /// 0051056 // regulation of small GTPase mediated signal transduction // inferred from electronic annotation	0005622 // intracellular // inferred from electronic annotation /// 0005737 // cytoplasm // inferred from electronic annotation /// 0005829 // cytosol // inferred from sequence or structural similarity /// 0005886 // plasma membrane // inferred from electronic annotation /// 0005886 // plasma membrane // inferred from sequence or structural similarity /// 0016020 // membrane // inferred from elec…	0005085 // guanyl-nucleotide exchange factor activity // inferred from electronic annotation /// 0005509 // calcium ion binding // inferred from electronic annotation /// 0008270 // zinc ion binding // inferred from electronic annotation /// 0019992 // diacylglycerol binding // inferred from electronic annotation /// 0046872 // metal ion binding // inferred from electronic annotation	8.06857	7.7334	7.84827	6.43901	6.61551	6.5302	8.75729	9.03528	8.42336	6.52824	7.88341	8.73864
1427350_a_at	GTP binding protein 6 (putative)	Gtpbp6	273.135	702.587	0.388756	0.00430444	No	Yes	---	0005622 // intracellular // inferred from electronic annotation	0000166 // nucleotide binding // inferred from electronic annotation /// 0005525 // GTP binding // inferred from electronic annotation	9.57427	9.41808	9.37725	7.99648	8.11852	8.16541	8.26073	8.25423	8.18139	8.09347	9.45653	8.23212
1424268_at	spermine oxidase	Smox	78.5553	202.374	0.38817	0.00480231	No	Yes	0046208 // spermine catabolic process // inferred from direct assay /// 0055114 // oxidation reduction // inferred from electronic annotation	0005634 // nucleus // inferred from electronic annotation /// 0005737 // cytoplasm // inferred from electronic annotation	0009055 // electron carrier activity // inferred from electronic annotation /// 0016491 // oxidoreductase activity // inferred from electronic annotation /// 0046592 // polyamine oxidase activity // inferred from direct assay	7.52628	7.65417	7.80218	6.43901	6.22478	6.22312	7.02616	6.99769	6.9524	6.29564	7.66088	6.99208
1420266_at	predicted gene, ENSMUSG00000074106	ENSMUSG00000074106	90.3102	232.789	0.387949	0.00459075	No	Yes	---	---	---	7.7082	7.99016	7.89027	6.45591	6.43716	6.59738	6.95758	6.91231	7.16045	6.49682	7.86288	7.01011
1447524_at	adaptor-related protein complex 3, mu 2 subunit	Ap3m2	39.6025	102.843	0.385076	0.0046807	No	Yes	0006810 // transport // inferred from electronic annotation /// 0006886 // intracellular protein transport // inferred from electronic annotation /// 0015031 // protein transport // inferred from electronic annotation /// 0016192 // vesicle-mediated transport // inferred from electronic annotation	0005794 // Golgi apparatus // inferred from electronic annotation /// 0016020 // membrane // inferred from electronic annotation /// 0030117 // membrane coat // inferred from electronic annotation /// 0030131 // clathrin adaptor complex // inferred from electronic annotation /// 0030659 // cytoplasmic vesicle membrane // inferred from electronic annotation /// 0031410 // cytoplasmic vesicle // in…	0005515 // protein binding // inferred from electronic annotation	6.75621	6.73409	6.56261	5.15677	5.42942	5.33637	5.35423	5.18078	5.5295	5.30752	6.6843	5.35484
1439778_at	CDK5 and Abl enzyme substrate 1 (Cables1), mRNA	Cables1	10.7483	28.0059	0.383787	0.00470066	No	Yes	0000082 // G1/S transition of mitotic cell cycle // traceable author statement /// 0007049 // cell cycle // inferred from electronic annotation /// 0007399 // nervous system development // inferred from mutant phenotype /// 0051301 // cell division // inferred from electronic annotation /// 0051302 // regulation of cell division // inferred from electronic annotation /// 0051726 // regulation of …	0005634 // nucleus // inferred from electronic annotation /// 0005737 // cytoplasm // inferred from electronic annotation /// 0005829 // cytosol // inferred from electronic annotation /// 0042995 // cell projection // inferred from electronic annotation	0005515 // protein binding // inferred from physical interaction /// 0005515 // protein binding // inferred from electronic annotation /// 0016538 // cyclin-dependent protein kinase regulator activity // inferred from electronic annotation	4.74374	4.89147	4.78777	3.27575	3.39896	3.6034	3.4783	3.66962	3.83109	3.42604	4.80766	3.65967
1431227_at	---	---	44.01	114.942	0.382889	0.00475567	No	Yes	---	---	---	6.89054	6.79794	6.8458	5.26696	5.49178	5.62054	5.34414	5.61109	5.80112	5.45976	6.84476	5.58545
1456167_at	expressed sequence AA619741	AA619741	72.8757	191.108	0.381333	0.00446103	No	Yes	---	---	---	7.67303	7.61428	7.44742	6.05677	6.2336	6.27173	6.72964	6.67845	6.66699	6.18737	7.57824	6.69169
1452975_at	alanine-glyoxylate aminotransferase 2-like 1	Agxt2l1	15.4124	42.1352	0.365784	0.00492234	No	Yes	---	0005739 // mitochondrion // inferred from electronic annotation	0003824 // catalytic activity // inferred from electronic annotation /// 0008483 // transaminase activity // inferred from electronic annotation /// 0016740 // transferase activity // inferred from electronic annotation /// 0030170 // pyridoxal phosphate binding // inferred from electronic annotation	5.53121	5.47731	5.18234	4.01726	3.86417	3.95662	3.9133	4.02425	4.07569	3.94602	5.39695	4.00441
1441762_at	---	---	88.5483	242.297	0.365454	0.0049604	No	Yes	---	---	---	7.89977	7.89977	7.96235	6.25171	6.64944	6.50403	9.11803	9.36015	9.16558	6.46839	7.92063	9.21459
1447833_x_at	microfibrillar-associated protein 2	Mfap2	54.2853	148.639	0.365216	0.00440516	No	Yes	---	0001527 // microfibril // inferred from electronic annotation /// 0005576 // extracellular region // inferred from electronic annotation /// 0005578 // proteinaceous extracellular matrix // inferred from electronic annotation	---	7.15985	7.11139	7.37576	5.68482	5.75256	5.85009	6.19298	6.52008	6.39618	5.76249	7.21567	6.36975
1440328_at	nuclear autoantigenic sperm protein (histone-binding)	Nasp	85.9036	236.546	0.363157	0.00430444	No	Yes	0001824 // blastocyst development // inferred from mutant phenotype /// 0006260 // DNA replication // inferred from direct assay /// 0006260 // DNA replication // inferred from electronic annotation /// 0006810 // transport // inferred from electronic annotation /// 0007049 // cell cycle // inferred from direct assay /// 0007049 // cell cycle // inferred from electronic annotation /// 0008283 // …	0005634 // nucleus // inferred from direct assay /// 0005634 // nucleus // inferred from electronic annotation /// 0005737 // cytoplasm // inferred from electronic annotation	0005488 // binding // inferred from electronic annotation /// 0005515 // protein binding // inferred from physical interaction /// 0042393 // histone binding // inferred from direct assay /// 0051879 // Hsp90 protein binding // inferred from direct assay	7.80904	7.95567	7.89323	6.27827	6.44992	6.54575	6.41948	6.32715	6.4346	6.42465	7.88598	6.39374
1427385_s_at	actinin, alpha 1	Actn1	20.8436	57.6263	0.361702	0.00459075	No	Yes	0016481 // negative regulation of transcription // inferred from direct assay /// 0030865 // cortical cytoskeleton organization // traceable author statement /// 0048041 // focal adhesion formation // inferred from electronic annotation /// 0051017 // actin filament bundle formation // inferred from direct assay /// 0051271 // negative regulation of cell motion // inferred from electronic annotat…	0001725 // stress fiber // traceable author statement /// 0005634 // nucleus // inferred from direct assay /// 0005737 // cytoplasm // inferred from electronic annotation /// 0005856 // cytoskeleton // inferred from electronic annotation /// 0005925 // focal adhesion // traceable author statement /// 0005925 // focal adhesion // inferred from electronic annotation /// 0015629 // actin cytoskeleto…	0003714 // transcription corepressor activity // inferred from direct assay /// 0003779 // actin binding // not recorded /// 0003779 // actin binding // inferred from electronic annotation /// 0005178 // integrin binding // inferred from electronic annotation /// 0005509 // calcium ion binding // inferred from electronic annotation /// 0005515 // protein binding // inferred from physical interact…	5.88254	5.88371	5.77972	4.27165	4.58029	4.29265	4.42839	4.58029	4.42335	4.38153	5.84866	4.47734
1429261_at	RIKEN cDNA 2210411K11 gene	2210411K11Rik	97.0861	273.327	0.355201	0.00476976	No	Yes	---	---	---	8.07783	8.09207	8.11356	6.82625	6.53723	6.4401	6.31806	6.27439	6.50789	6.60119	8.09449	6.36678
1421541_a_at	myocyte enhancer factor 2B	Mef2b	38.7411	109.774	0.352917	0.00424039	No	Yes	0006350 // transcription // inferred from electronic annotation /// 0006355 // regulation of transcription, DNA-dependent // inferred from direct assay /// 0006355 // regulation of transcription, DNA-dependent // inferred from electronic annotation	0005634 // nucleus // inferred by curator /// 0005634 // nucleus // inferred from electronic annotation	0003677 // DNA binding // inferred from electronic annotation /// 0003700 // transcription factor activity // inferred from direct assay /// 0003700 // transcription factor activity // inferred from electronic annotation /// 0043565 // sequence-specific DNA binding // inferred from electronic annotation	6.7516	6.71377	6.86981	5.32064	5.14684	5.3599	5.69	5.73279	5.80193	5.27579	6.77839	5.74157
1450512_at	netrin 4	Ntn4	23.9175	68.287	0.35025	0.00430444	No	Yes	0016322 // neuron remodeling // inferred from direct assay	0005576 // extracellular region // inferred from electronic annotation /// 0005578 // proteinaceous extracellular matrix // inferred from electronic annotation /// 0005604 // basement membrane // inferred from direct assay /// 0005604 // basement membrane // inferred from sequence or structural similarity /// 0005604 // basement membrane // inferred from electronic annotation	0005515 // protein binding // inferred from electronic annotation	5.97193	6.08169	6.227	4.50432	4.6494	4.58627	5.40531	5.42092	5.28931	4.58	6.09354	5.37185
1441698_at	---	---	123.346	359.651	0.342961	0.0046807	No	Yes	---	---	---	8.59566	8.3927	8.483	7.00543	6.75637	7.07791	7.93355	8.60456	8.6927	6.94657	8.49045	8.41027
1420183_at	Loricrin, mRNA (cDNA clone IMAGE:4190845)	Lor	35.3566	103.531	0.341508	0.00459075	No	Yes	0018149 // peptide cross-linking // inferred from electronic annotation /// 0030216 // keratinocyte differentiation // inferred from electronic annotation /// 0031424 // keratinization // inferred from electronic annotation	0001533 // cornified envelope // inferred from direct assay /// 0001533 // cornified envelope // inferred from electronic annotation /// 0009898 // internal side of plasma membrane // inferred from direct assay	0005200 // structural constituent of cytoskeleton // inferred from direct assay /// 0030280 // structural constituent of epidermis // inferred from direct assay /// 0030674 // protein binding, bridging // inferred from electronic annotation	6.65285	6.81565	6.61324	4.97129	5.17502	5.28541	5.36117	5.41792	5.29726	5.14391	6.69391	5.35878
1431734_a_at	DnaJ (Hsp40) homolog, subfamily B, member 4	Dnajb4	45.5709	133.568	0.341181	0.00459075	No	Yes	0006457 // protein folding // inferred from electronic annotation	---	0031072 // heat shock protein binding // inferred from electronic annotation /// 0051082 // unfolded protein binding // inferred from electronic annotation	6.93176	7.01585	7.23668	5.4097	5.50815	5.61227	6.34705	6.43901	6.34705	5.51004	7.06143	6.3777
1458991_at	---	---	57.456	169.466	0.339041	0.00459075	No	Yes	---	---	---	7.39292	7.33319	7.48845	5.66111	6.01701	5.85504	6.60649	6.90279	6.85795	5.84439	7.40485	6.78908
1416006_at	midkine	Mdk	60.1988	183.778	0.327564	0.00459075	No	Yes	0007275 // multicellular organismal development // inferred from electronic annotation /// 0008283 // cell proliferation // inferred from electronic annotation /// 0009611 // response to wounding // inferred from direct assay /// 0030154 // cell differentiation // inferred from electronic annotation /// 0030325 // adrenal gland development // inferred from sequence or structural similarity	0005576 // extracellular region // inferred from electronic annotation	0008083 // growth factor activity // inferred from electronic annotation /// 0008201 // heparin binding // inferred from electronic annotation /// 0008201 // heparin binding // inferred from sequence or structural similarity	7.45786	7.54417	7.56342	6.03308	5.69297	6.00894	6.31594	6.01214	6.04086	5.91166	7.52182	6.12298
1455071_at	zinc finger and BTB domain containing 7B	Zbtb7b	193.897	593.184	0.326876	0.00430444	No	Yes	0006350 // transcription // inferred from electronic annotation /// 0006355 // regulation of transcription, DNA-dependent // inferred from electronic annotation /// 0007275 // multicellular organismal development // inferred from electronic annotation /// 0030154 // cell differentiation // inferred from electronic annotation /// 0045944 // positive regulation of transcription from RNA polymerase …	0005622 // intracellular // inferred from electronic annotation /// 0005634 // nucleus // inferred from electronic annotation	0003676 // nucleic acid binding // inferred from electronic annotation /// 0003677 // DNA binding // inferred from direct assay /// 0003677 // DNA binding // inferred from electronic annotation /// 0003700 // transcription factor activity // inferred from direct assay /// 0005515 // protein binding // inferred from electronic annotation /// 0008270 // zinc ion binding // inferred from electronic …	9.35066	9.11739	9.16896	7.53032	7.54038	7.72675	7.88671	7.85095	8.43215	7.59915	9.21234	8.0566
1422377_at	vomeronasal 1 receptor, B4	V1rb4	72.7171	223.191	0.325806	0.00440516	No	Yes	0007165 // signal transduction // inferred from electronic annotation /// 0007186 // G-protein coupled receptor protein signaling pathway // inferred from electronic annotation /// 0007606 // sensory perception of chemical stimulus // traceable author statement /// 0019236 // response to pheromone // inferred from electronic annotation	0005886 // plasma membrane // inferred from electronic annotation /// 0016020 // membrane // inferred from electronic annotation /// 0016021 // integral to membrane // inferred from electronic annotation	0004871 // signal transducer activity // inferred from electronic annotation /// 0004872 // receptor activity // inferred from sequence or structural similarity /// 0004872 // receptor activity // inferred from electronic annotation /// 0004930 // G-protein coupled receptor activity // inferred from electronic annotation /// 0016503 // pheromone receptor activity // inferred from electronic annot…	7.93079	7.73698	7.73864	6.01228	6.29079	6.2496	6.49378	6.49378	6.54531	6.18422	7.80214	6.51096
1447748_x_at	solute carrier family 29 (nucleoside transporters), member 2	Slc29a2	22.2212	69.4216	0.32009	0.00248757	No	Yes	0006810 // transport // inferred from electronic annotation /// 0015858 // nucleoside transport // inferred from direct assay	0005634 // nucleus // inferred from electronic annotation /// 0005887 // integral to plasma membrane // inferred from sequence or structural similarity /// 0016020 // membrane // inferred from electronic annotation /// 0016021 // integral to membrane // inferred from electronic annotation /// 0031965 // nuclear membrane // inferred from electronic annotation	0005337 // nucleoside transmembrane transporter activity // inferred from direct assay /// 0005337 // nucleoside transmembrane transporter activity // inferred from electronic annotation	6.15617	6.10584	6.08993	4.53457	4.44351	4.44351	4.40544	4.77212	4.77212	4.47386	6.11731	4.64989
1455903_at	TBC1 domain family, member 4	Tbc1d4	106.286	332.104	0.320039	0.00459075	No	Yes	0032313 // regulation of Rab GTPase activity // inferred from electronic annotation	0005622 // intracellular // inferred from electronic annotation	0005096 // GTPase activator activity // inferred from electronic annotation /// 0005097 // Rab GTPase activator activity // inferred from electronic annotation	8.28431	8.3886	8.45356	6.58202	6.93809	6.67532	7.26073	7.26073	7.69068	6.73181	8.37549	7.40405
1420047_at	MAF1 homolog (S. cerevisiae) (Maf1), mRNA	Maf1	26.8564	85.0235	0.315871	0.00248757	No	Yes	0006350 // transcription // inferred from electronic annotation /// 0006355 // regulation of transcription, DNA-dependent // inferred from electronic annotation /// 0016480 // negative regulation of transcription from RNA polymerase III promoter // inferred from electronic annotation	0005622 // intracellular // inferred from electronic annotation /// 0005634 // nucleus // inferred from electronic annotation	0030528 // transcription regulator activity // inferred from electronic annotation	6.41898	6.4329	6.37749	4.69252	4.81796	4.73111	5.01591	5.167	5.07838	4.7472	6.40979	5.0871
1440565_at	---	---	49.4334	158.123	0.312627	0.00446103	No	Yes	---	---	---	7.4198	7.14382	7.35108	5.52143	5.77918	5.58163	6.2917	6.79322	6.90203	5.62741	7.3049	6.66232
1429719_at	forkhead box P4	Foxp4	76.4598	250.597	0.30511	0.00468814	No	Yes	0000122 // negative regulation of transcription from RNA polymerase II promoter // inferred from direct assay /// 0006350 // transcription // inferred from electronic annotation /// 0006355 // regulation of transcription, DNA-dependent // inferred from electronic annotation /// 0007507 // heart development // inferred from mutant phenotype /// 0048617 // embryonic foregut morphogenesis // inferre…	0005622 // intracellular // inferred from electronic annotation /// 0005634 // nucleus // inferred by curator /// 0005634 // nucleus // inferred from electronic annotation	0003677 // DNA binding // inferred from direct assay /// 0003677 // DNA binding // inferred from electronic annotation /// 0003700 // transcription factor activity // inferred from electronic annotation /// 0008270 // zinc ion binding // inferred from electronic annotation /// 0016564 // transcription repressor activity // inferred from direct assay /// 0042803 // protein homodimerization activit…	7.91726	7.90586	8.08456	6.32087	6.0317	6.41732	6.58024	6.45166	7.11377	6.25663	7.96923	6.71522
1425167_a_at	guanine nucleotide binding protein (G protein), gamma transducing activity polyp	Gngt1	12.7616	44.8074	0.28481	0.00459075	No	Yes	0007165 // signal transduction // inferred from electronic annotation /// 0007186 // G-protein coupled receptor protein signaling pathway // not recorded /// 0007186 // G-protein coupled receptor protein signaling pathway // inferred from electronic annotation /// 0007602 // phototransduction // inferred from mutant phenotype /// 0008104 // protein localization // inferred from mutant phenotype /…	0005834 // heterotrimeric G-protein complex // not recorded /// 0005834 // heterotrimeric G-protein complex // inferred from electronic annotation /// 0005886 // plasma membrane // inferred from electronic annotation /// 0016020 // membrane // inferred from electronic annotation	0003924 // GTPase activity // not recorded /// 0004871 // signal transducer activity // inferred from electronic annotation	5.53972	5.45335	5.46393	3.89175	3.45184	3.67762	3.66145	3.88054	3.89175	3.67374	5.48567	3.81125
1420037_at	CDNA fis, clone TRACH2013369,highly similar to ATP SYNTHASE ALPHA CHAIN, MITOCHO	Atp5a1	63.7485	226.087	0.281965	0.0046807	No	Yes	0006629 // lipid metabolic process // inferred from mutant phenotype /// 0006754 // ATP biosynthetic process // inferred from electronic annotation /// 0006810 // transport // inferred from electronic annotation /// 0006811 // ion transport // inferred from electronic annotation /// 0009790 // embryonic development // inferred from mutant phenotype /// 0015986 // ATP synthesis coupled proton tran…	0005739 // mitochondrion // inferred from direct assay /// 0005739 // mitochondrion // inferred from electronic annotation /// 0005743 // mitochondrial inner membrane // inferred from direct assay /// 0005743 // mitochondrial inner membrane // inferred from electronic annotation /// 0016020 // membrane // inferred from electronic annotation /// 0016469 // proton-transporting two-sector ATPase com…	0000166 // nucleotide binding // inferred from electronic annotation /// 0005524 // ATP binding // inferred from mutant phenotype /// 0005524 // ATP binding // inferred from electronic annotation /// 0015078 // hydrogen ion transmembrane transporter activity // inferred from electronic annotation /// 0016820 // hydrolase activity, acting on acid anhydrides, catalyzing transmembrane movement of su…	7.67427	8.04465	7.74328	6.11099	5.8589	6.01307	6.9297	6.97593	7.1701	5.99432	7.82073	7.02524
1428669_at	brain expressed myelocytomatosis oncogene	Bmyc	148.631	530.373	0.280239	0.00414948	No	Yes	0006355 // regulation of transcription, DNA-dependent // inferred from electronic annotation	0005634 // nucleus // inferred from electronic annotation /// 0005819 // spindle // inferred from direct assay	0003700 // transcription factor activity // inferred from electronic annotation /// 0005515 // protein binding // inferred from physical interaction	9.15603	9.1022	8.89436	7.1735	7.30184	7.17144	7.06924	6.90455	7.49507	7.21559	9.05086	7.15629
1440930_a_at	scratch homolog 2, zinc finger protein (Drosophila)	Scrt2	29.5117	107.236	0.275202	0.00492234	No	Yes	0006350 // transcription // inferred from electronic annotation /// 0006355 // regulation of transcription, DNA-dependent // inferred from electronic annotation	0005622 // intracellular // inferred from electronic annotation /// 0005634 // nucleus // inferred from electronic annotation	0003676 // nucleic acid binding // inferred from electronic annotation /// 0003677 // DNA binding // inferred from electronic annotation /// 0008270 // zinc ion binding // inferred from electronic annotation /// 0046872 // metal ion binding // inferred from electronic annotation	6.77095	6.98834	6.47466	4.86265	4.88408	4.90291	5.27892	5.36986	5.37093	4.88321	6.74465	5.3399
1419757_at	phosphatidylinositol transfer protein, membrane-associated 2	Pitpnm2	66.0102	241.806	0.272988	0.00430444	No	Yes	0006810 // transport // inferred from electronic annotation	0005622 // intracellular // inferred from direct assay /// 0005622 // intracellular // inferred from electronic annotation /// 0005625 // soluble fraction // inferred from direct assay /// 0005737 // cytoplasm // inferred from electronic annotation /// 0005856 // cytoskeleton // inferred from electronic annotation /// 0012505 // endomembrane system // inferred from electronic annotation /// 00160…	0005509 // calcium ion binding // inferred from electronic annotation /// 0005543 // phospholipid binding // not recorded /// 0008289 // lipid binding // inferred from electronic annotation /// 0046872 // metal ion binding // inferred from electronic annotation	7.83153	8.05053	7.87106	6.077	6.19621	5.86064	7.37229	7.37229	7.84077	6.04462	7.91771	7.52845
1420570_x_at	T-cell leukemia/lymphoma 1B, 3	Tcl1b3	573.804	2192.61	0.261699	0.00417426	No	Yes	---	---	---	11.078	11.0248	11.1925	9.03228	9.12874	9.33222	9.43844	9.34286	9.81737	9.16441	11.0984	9.53289
1448346_at	cofilin 1, non-muscle	Cfl1	652.045	2619	0.248967	0.0046807	No	Yes	0000910 // cytokinesis // inferred from mutant phenotype /// 0001755 // neural crest cell migration // inferred from mutant phenotype /// 0001842 // neural fold formation // inferred from mutant phenotype /// 0006928 // cell motion // inferred from mutant phenotype /// 0007015 // actin filament organization // inferred from mutant phenotype /// 0030010 // establishment of cell polarity // inferre…	0005622 // intracellular // inferred from electronic annotation /// 0005634 // nucleus // inferred from electronic annotation /// 0005737 // cytoplasm // inferred from direct assay /// 0005737 // cytoplasm // inferred from electronic annotation /// 0005856 // cytoskeleton // inferred from electronic annotation /// 0016363 // nuclear matrix // inferred from electronic annotation /// 0030864 // cor…	0003779 // actin binding // inferred from electronic annotation /// 0005515 // protein binding // inferred from electronic annotation	11.3451	11.3055	11.4138	9.57811	9.38967	9.0787	8.99685	8.50583	9.00266	9.34883	11.3548	8.83511
1457933_at	Gene model 1964, (NCBI) (Gm1964), mRNA	Gm1964	30.9828	126.736	0.244467	0.00414948	No	Yes	0006810 // transport // inferred from electronic annotation	0016020 // membrane // inferred from electronic annotation /// 0016021 // integral to membrane // inferred from electronic annotation	---	6.97541	6.87098	7.11066	4.81903	5.05279	4.98837	6.03124	6.01516	6.47902	4.9534	6.98568	6.17514
1426816_at	coiled-coil domain containing 64	Ccdc64	88.7794	366.603	0.242168	0.00430444	No	Yes	---	---	---	8.58567	8.28411	8.68444	6.41969	6.53513	6.46164	7.19088	7.13036	7.79776	6.47215	8.51807	7.373
1420735_at	gamma-aminobutyric acid (GABA-C) receptor, subunit rho 2	Gabrr2	30.6689	130.472	0.235061	0.00248757	No	Yes	0006810 // transport // inferred from electronic annotation /// 0006811 // ion transport // inferred from electronic annotation /// 0006821 // chloride transport // traceable author statement /// 0007214 // gamma-aminobutyric acid signaling pathway // inferred from mutant phenotype /// 0007601 // visual perception // inferred from mutant phenotype /// 0042462 // eye photoreceptor cell development…	0005886 // plasma membrane // inferred from electronic annotation /// 0016020 // membrane // inferred from electronic annotation /// 0016021 // integral to membrane // inferred from electronic annotation /// 0030054 // cell junction // inferred from electronic annotation /// 0030424 // axon // traceable author statement /// 0045202 // synapse // inferred from electronic annotation /// 0045211 // …	0004872 // receptor activity // inferred from electronic annotation /// 0004890 // GABA-A receptor activity // inferred from mutant phenotype /// 0004890 // GABA-A receptor activity // inferred from electronic annotation /// 0005216 // ion channel activity // inferred from electronic annotation /// 0005230 // extracellular ligand-gated ion channel activity // inferred from electronic annotation /…	7.03491	6.97127	7.07661	4.92127	5.01849	4.87636	5.87347	6.03973	5.91463	4.93871	7.0276	5.94261
1447772_at	pleckstrin homology domain-containing, family A (phosphoinositide binding specif	Plekha3	26.5307	113.978	0.232771	0.00459075	No	Yes	---	0005737 // cytoplasm // inferred from electronic annotation /// 0016020 // membrane // inferred from electronic annotation	0005543 // phospholipid binding // inferred from electronic annotation /// 0005545 // phosphatidylinositol binding // inferred from direct assay /// 0008289 // lipid binding // inferred from electronic annotation	6.61487	7.05211	6.83084	4.64344	4.89713	4.6482	5.35717	5.26713	5.59094	4.72959	6.83261	5.40508
1451046_at	similar to FOG /// zinc finger protein, multitype 1	LOC100047651 /// Zfpm1	111.398	510.796	0.218086	0.00430444	No	Yes	0000122 // negative regulation of transcription from RNA polymerase II promoter // traceable author statement /// 0006350 // transcription // inferred from electronic annotation /// 0006355 // regulation of transcription, DNA-dependent // inferred from electronic annotation /// 0007507 // heart development // inferred from mutant phenotype	0005622 // intracellular // inferred from electronic annotation /// 0005634 // nucleus // inferred from direct assay /// 0005634 // nucleus // inferred from electronic annotation	0003676 // nucleic acid binding // inferred from electronic annotation /// 0003677 // DNA binding // inferred from electronic annotation /// 0003714 // transcription corepressor activity // traceable author statement /// 0005515 // protein binding // inferred from physical interaction /// 0008270 // zinc ion binding // inferred from electronic annotation /// 0046872 // metal ion binding // inferr…	8.90044	8.91529	9.17408	7.01317	6.67905	6.7065	7.28679	7.37224	8.15497	6.79957	8.9966	7.60467
1427725_a_at	POU domain, class 2, transcription factor 2	Pou2f2	62.8006	300.264	0.209151	0.00424039	No	Yes	0002335 // mature B cell differentiation // inferred from mutant phenotype /// 0002380 // immunoglobulin secretion during immune response // inferred from mutant phenotype /// 0006350 // transcription // inferred from electronic annotation /// 0006355 // regulation of transcription, DNA-dependent // inferred from direct assay /// 0006355 // regulation of transcription, DNA-dependent // inferred f…	0005634 // nucleus // inferred from direct assay /// 0005634 // nucleus // not recorded /// 0005634 // nucleus // inferred from electronic annotation /// 0005737 // cytoplasm // inferred from electronic annotation	0003677 // DNA binding // inferred from direct assay /// 0003677 // DNA binding // inferred from electronic annotation /// 0003700 // transcription factor activity // inferred from direct assay /// 0003700 // transcription factor activity // inferred from electronic annotation /// 0030528 // transcription regulator activity // inferred from electronic annotation /// 0043565 // sequence-specific D…	8.25497	8.05399	8.3813	5.84723	6.11321	5.95768	6.68719	6.71263	7.27203	5.97271	8.23009	6.89062
1424518_at	apolipoprotein L 9a /// apolipoprotein L 9b	Apol9a /// Apol9b	32.5915	158.313	0.205868	0.00430444	No	Yes	0006869 // lipid transport // inferred from electronic annotation /// 0042157 // lipoprotein metabolic process // inferred from electronic annotation	0005576 // extracellular region // inferred from electronic annotation	0008289 // lipid binding // inferred from electronic annotation	7.08043	7.57129	7.26818	5.05534	5.01669	5.00724	5.72823	6.04123	5.65592	5.02642	7.30663	5.80846
1438291_x_at	predicted gene, 100043481 /// predicted gene, OTTMUSG00000009529 /// ribosomal p	100043481 /// OTTMUSG00000009529 /// Rpl37	290.241	1423.87	0.20384	0.00430444	No	Yes	0006412 // translation // inferred from electronic annotation	0005622 // intracellular // inferred from electronic annotation /// 0005840 // ribosome // inferred from electronic annotation /// 0030529 // ribonucleoprotein complex // inferred from electronic annotation	0003723 // RNA binding // inferred from electronic annotation /// 0003735 // structural constituent of ribosome // inferred from electronic annotation /// 0008270 // zinc ion binding // inferred from electronic annotation /// 0019843 // rRNA binding // inferred from electronic annotation /// 0046872 // metal ion binding // inferred from electronic annotation	10.6085	10.3782	10.4401	8.1949	8.36207	7.98636	8.20404	8.41433	8.89318	8.18111	10.4756	8.50385
1416521_at	selenoprotein W, muscle 1	Sepw1	163.466	837.992	0.195069	0.00430444	No	Yes	0045454 // cell redox homeostasis // inferred from electronic annotation	0005737 // cytoplasm // traceable author statement /// 0005737 // cytoplasm // inferred from electronic annotation /// 0005886 // plasma membrane // traceable author statement	0008430 // selenium binding // inferred from electronic annotation /// 0016491 // oxidoreductase activity // traceable author statement	9.80633	9.87704	9.44901	7.28428	7.35122	7.42304	6.34894	6.08102	6.28553	7.35285	9.71079	6.2385
1417163_at	dual specificity phosphatase 10	Dusp10	28.5088	149.205	0.191071	0.00459075	No	Yes	0006470 // protein amino acid dephosphorylation // inferred from electronic annotation /// 0016311 // dephosphorylation // inferred from electronic annotation	0005634 // nucleus // inferred from electronic annotation /// 0005737 // cytoplasm // inferred from electronic annotation	0004721 // phosphoprotein phosphatase activity // inferred from electronic annotation /// 0004725 // protein tyrosine phosphatase activity // inferred from electronic annotation /// 0008138 // protein tyrosine/serine/threonine phosphatase activity // inferred from electronic annotation /// 0016787 // hydrolase activity // inferred from electronic annotation /// 0016791 // phosphatase activity // …	7.19149	7.45137	7.0206	4.77917	4.66801	5.05282	4.89158	5.24689	5.10886	4.83333	7.22115	5.08244
1420089_at	Nuclear factor of kappa light polypeptide gene enhancer in B-cells inhibitor, al	Nfkbia	127.071	761.039	0.166971	0.00293081	No	Yes	0000060 // protein import into nucleus, translocation // inferred from direct assay /// 0031663 // lipopolysaccharide-mediated signaling pathway // inferred from direct assay /// 0032495 // response to muramyl dipeptide // inferred from direct assay /// 0032496 // response to lipopolysaccharide // inferred from direct assay /// 0042127 // regulation of cell proliferation // inferred from direct a…	0005634 // nucleus // inferred from direct assay /// 0005634 // nucleus // inferred from electronic annotation /// 0005737 // cytoplasm // inferred from direct assay /// 0005737 // cytoplasm // inferred from electronic annotation /// 0005829 // cytosol // inferred from direct assay	0005515 // protein binding // inferred from physical interaction /// 0008139 // nuclear localization sequence binding // inferred from electronic annotation /// 0031625 // ubiquitin protein ligase binding // inferred from electronic annotation /// 0042802 // identical protein binding // inferred from electronic annotation /// 0051059 // NF-kappaB binding // inferred from electronic annotation	9.58423	9.49294	9.63831	7.10956	6.85649	7.00244	9.08595	9.09	9.02687	6.9895	9.57183	9.06761
1422632_at	cathepsin W	Ctsw	119.729	924.357	0.129526	0.00430444	No	Yes	0006508 // proteolysis // inferred from electronic annotation	---	0004197 // cysteine-type endopeptidase activity // inferred from electronic annotation /// 0008233 // peptidase activity // inferred from electronic annotation /// 0008234 // cysteine-type peptidase activity // inferred from electronic annotation /// 0016787 // hydrolase activity // inferred from electronic annotation	9.82851	9.64751	10.0809	7.15716	6.81442	6.73929	7.62579	7.59544	7.69773	6.90362	9.85231	7.63965
1449381_a_at	protein kinase C and casein kinase substrate in neurons 1	Pacsin1	47.621	414.113	0.114995	0.00439748	No	Yes	0006897 // endocytosis // inferred from electronic annotation /// 0007165 // signal transduction // traceable author statement /// 0045806 // negative regulation of endocytosis // inferred from direct assay	0005737 // cytoplasm // inferred from direct assay /// 0005737 // cytoplasm // inferred from electronic annotation /// 0005802 // trans-Golgi network // inferred from direct assay /// 0030137 // COPI-coated vesicle // inferred from direct assay	0005515 // protein binding // inferred from physical interaction /// 0008092 // cytoskeletal protein binding // inferred from direct assay /// 0016301 // kinase activity // inferred from electronic annotation	8.90183	8.58005	8.59976	5.25206	5.844	5.62452	6.67278	6.71188	6.75787	5.57353	8.69388	6.71418
1419117_at	solute carrier family 22 (organic cation transporter), member 2	Slc22a2	23.1625	209.438	0.110593	0.0046807	No	Yes	0006810 // transport // inferred from electronic annotation /// 0006811 // ion transport // inferred from electronic annotation /// 0006812 // cation transport // inferred from direct assay /// 0015695 // organic cation transport // not recorded	0005887 // integral to plasma membrane // not recorded /// 0005887 // integral to plasma membrane // inferred from electronic annotation /// 0016020 // membrane // inferred from electronic annotation /// 0016021 // integral to membrane // inferred from electronic annotation	0005215 // transporter activity // inferred from electronic annotation /// 0015075 // ion transmembrane transporter activity // inferred from electronic annotation /// 0015101 // organic cation transmembrane transporter activity // inferred from direct assay /// 0015101 // organic cation transmembrane transporter activity // not recorded /// 0015220 // choline transmembrane transporter activity /…	7.74876	7.44204	7.94034	4.1647	4.7006	4.73585	6.38361	6.38361	6.38361	4.53372	7.71038	6.38361
1416368_at	glutathione S-transferase, alpha 4	Gsta4	51.0543	492.637	0.103635	0.00256939	No	Yes	0008152 // metabolic process // inferred from electronic annotation	0005737 // cytoplasm // inferred from electronic annotation	0004364 // glutathione transferase activity // not recorded /// 0004364 // glutathione transferase activity // traceable author statement /// 0004364 // glutathione transferase activity // inferred from electronic annotation /// 0016740 // transferase activity // inferred from electronic annotation	8.89354	8.83198	9.10762	5.70543	5.68482	5.63163	7.46659	7.69328	7.33358	5.67396	8.94438	7.49782
1426043_a_at	calpain 3	Capn3	40.4614	411.045	0.0984353	0.00470066	No	Yes	0006508 // proteolysis // inferred from direct assay /// 0006508 // proteolysis // inferred from electronic annotation /// 0030239 // myofibril assembly // inferred from mutant phenotype /// 0042493 // response to drug // inferred from electronic annotation /// 0045214 // sarcomere organization // inferred from mutant phenotype /// 0051592 // response to calcium ion // inferred from electronic an…	0005622 // intracellular // inferred from electronic annotation /// 0005634 // nucleus // inferred from electronic annotation /// 0005737 // cytoplasm // inferred from electronic annotation	0004197 // cysteine-type endopeptidase activity // inferred from electronic annotation /// 0004198 // calcium-dependent cysteine-type endopeptidase activity // inferred from direct assay /// 0004198 // calcium-dependent cysteine-type endopeptidase activity // inferred from electronic annotation /// 0005509 // calcium ion binding // inferred from electronic annotation /// 0005515 // protein bindin…	8.66781	8.4494	8.93225	4.92094	5.45665	5.63783	7.30641	7.30434	7.04708	5.33847	8.68315	7.21928
1435872_at	---	---	107.515	1273.07	0.084453	0.00459075	No	Yes	---	---	---	10.3803	9.9169	10.6451	6.94021	6.50849	6.79648	8.12076	8.0397	8.10984	6.74839	10.3141	8.0901
1442434_at	DNA segment, Chr 8, ERATO Doi 82, expressed	D8Ertd82e	66.7109	947.606	0.0703994	0.00440516	No	Yes	0006468 // protein amino acid phosphorylation // inferred from electronic annotation	---	0000166 // nucleotide binding // inferred from electronic annotation /// 0004672 // protein kinase activity // inferred from electronic annotation /// 0004713 // protein tyrosine kinase activity // inferred from electronic annotation /// 0004715 // non-membrane spanning protein tyrosine kinase activity // inferred from electronic annotation /// 0005524 // ATP binding // inferred from electronic a…	10.1244	9.53903	10.001	5.74542	6.37362	6.06051	8.8153	8.94853	9.08401	6.05985	9.88814	8.94928
